# Supplementary material for: Interaction between Trinuclear Regium Complexes of Pyrazolate and Anions, a Computational Study
Source: MDPI journal article supplement (doi:10.3390/ijms21218036), 2020-10-28
Supplement: s1 [file s1]

# A Computational Study of the Interaction of Trinuclear Regium Complexes of Pyrazolate with Anions

Ibon Alkorta, José Elguero, Cristina Trujillo and Goar Sánchez-Sanz

|            |                                                                                                                                                                                                                      |
|------------|----------------------------------------------------------------------------------------------------------------------------------------------------------------------------------------------------------------------|
| Pg. S2-19  | Table S1. Molecular graph, electronic energy and geometry of the $(\text{Pz-Au})_3\text{:X}^{-\text{n}}$ complexes                                                                                                   |
| Pg. S20-43 | Table S2. Molecular graph, electronic energy and geometry of the $(\text{Pz-Ag})_3\text{:X}^{-\text{n}}$ complexes                                                                                                   |
| Pg. S44-65 | Table S3. Molecular graph, electronic energy and geometry of the $(\text{Pz-Cu})_3\text{:X}^{-\text{n}}$ complexes                                                                                                   |
| Pg. S66-67 | Table S4. Electron density properties at the intermolecular BCPs in the 1:1 complexes.                                                                                                                               |
| Pg. S68    | Table S5. Barriers ( $\text{kJ mol}^{-1}$ ) and interhalogen distance ( $\text{\AA}$ ) in the maximum of the dissociation curve (Fig. S1) of the 1:2 apical complexes.                                               |
| Pg. S69    | Table S6. Interatomic distances ( $\text{\AA}$ ) of the anions in the 1:2 complexes.                                                                                                                                 |
| Pg. S70    | Table S7. Anion-Anion repulsion corrected binding energies ( $\text{kJ mol}^{-1}$ ) in the 1:2 complexes.                                                                                                            |
| Pg. S71-72 | Table S8. Electron density properties at the intermolecular BCPs in the 1:2 complexes.                                                                                                                               |
| Pg. S73    | Table S9. Interatomic distances ( $\text{\AA}$ ) of the anions in the 1:3 complexes.                                                                                                                                 |
| Pg. S74    | Table S10. Anion-Anion repulsion corrected binding energies ( $\text{kJ/mol}$ ) in the 1:3 complexes.                                                                                                                |
| Pg. S75    | Table S11. Electron density properties at the intermolecular BCPs in the 1:3 complexes.                                                                                                                              |
| Pg. S76    | Table S12. Anion-Metal distances in the CSD search.                                                                                                                                                                  |
| Pg. S77.   | Figure S1. Energy profiles ( $\text{kJ mol}^{-1}$ ) as a function of the X-X distance ( $\text{\AA}$ ) in the 1:2 apical complexes. Only one of the X anions in move further away from the $(\text{Pz-M})_3$ system. |
| Pg. S78-79 | Figure S2. Electron density at the BCP (au) vs. the interatomic distance ( $\text{\AA}$ ).                                                                                                                           |

**Table S1.** Molecular graph, electronic energy and geometry of the (Pz-Au)<sub>3</sub>:X<sup>-</sup><sub>n</sub> complexes.

|                                                                                    |                               |
|------------------------------------------------------------------------------------|-------------------------------|
| 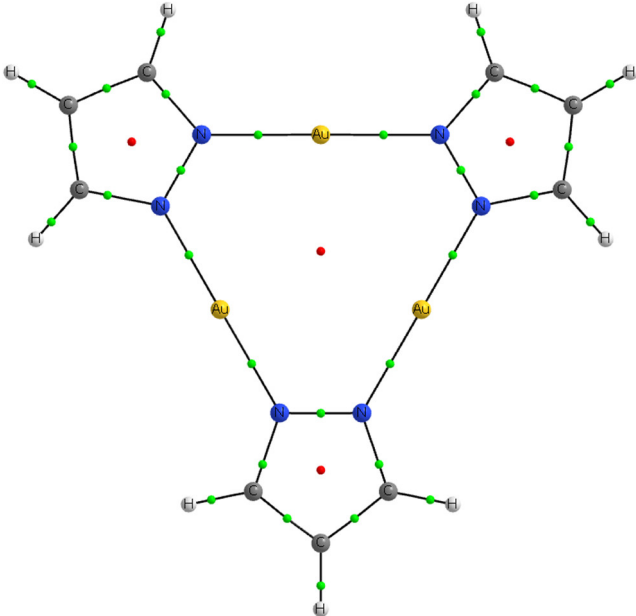 | MP2= -1081.14994583 NIMAG= 0  |
|                                                                                    | X                             |
|                                                                                    | X,1,r21                       |
|                                                                                    | X,1,r21,2,120.                |
|                                                                                    | X,1,r21,2,120.,3,180.,0       |
|                                                                                    | N,2,r52,1,90.,3,0.,0          |
|                                                                                    | N,2,r52,1,90.,4,0.,0          |
|                                                                                    | N,3,r52,1,90.,2,0.,0          |
|                                                                                    | N,3,r52,1,90.,4,0.,0          |
|                                                                                    | N,4,r52,1,90.,3,0.,0          |
|                                                                                    | N,4,r52,1,90.,2,0.,0          |
|                                                                                    | C,5,r115,2,a1152,1,180.,0     |
|                                                                                    | C,6,r115,2,a1152,1,180.,0     |
|                                                                                    | C,7,r115,3,a1152,1,180.,0     |
|                                                                                    | C,8,r115,3,a1152,1,180.,0     |
|                                                                                    | C,9,r115,4,a1152,1,180.,0     |
|                                                                                    | C,10,r115,4,a1152,1,180.,0    |
|                                                                                    | C,1,r171,3,120.,2,0.,0        |
|                                                                                    | C,1,r171,4,120.,3,0.,0        |
|                                                                                    | C,1,r171,2,120.,4,0.,0        |
|                                                                                    | H,11,r2011,5,a20115,2,180.,0  |
|                                                                                    | H,12,r2011,6,a20115,2,180.,0  |
|                                                                                    | H,13,r2011,7,a20115,3,180.,0  |
|                                                                                    | H,14,r2011,8,a20115,3,180.,0  |
|                                                                                    | H,15,r2011,9,a20115,4,180.,0  |
|                                                                                    | H,16,r2011,10,a20115,4,180.,0 |
|                                                                                    | H,1,r261,3,120.,2,0.,0        |
|                                                                                    | H,1,r261,4,120.,3,0.,0        |
|                                                                                    | H,1,r261,2,120.,4,0.,0        |
|                                                                                    | Au,1,r291,3,60.,2,0.,0        |
|                                                                                    | Au,1,r291,4,60.,3,0.,0        |
|                                                                                    | Au,1,r291,2,60.,4,0.,0        |
|                                                                                    | r21=2.66728329                |
|                                                                                    | r52=0.68024126                |
|                                                                                    | r115=1.36591004               |
|                                                                                    | r171=4.81517842               |
|                                                                                    | r2011=1.08842895              |
|                                                                                    | r261=5.9035919                |
|                                                                                    | r291=1.92172936               |
|                                                                                    | a1152=108.5958088             |
|                                                                                    | a20115=119.93401813           |

|                                                                                   |                                                                                                                                                                                                                                                                                                                                                                                                                                                                                                                                                                                                                                                                                                                                                                                                                                                                                                                                                                                                                                                                                                                                                                                                                                                                                                                                                  |
|-----------------------------------------------------------------------------------|--------------------------------------------------------------------------------------------------------------------------------------------------------------------------------------------------------------------------------------------------------------------------------------------------------------------------------------------------------------------------------------------------------------------------------------------------------------------------------------------------------------------------------------------------------------------------------------------------------------------------------------------------------------------------------------------------------------------------------------------------------------------------------------------------------------------------------------------------------------------------------------------------------------------------------------------------------------------------------------------------------------------------------------------------------------------------------------------------------------------------------------------------------------------------------------------------------------------------------------------------------------------------------------------------------------------------------------------------|
| 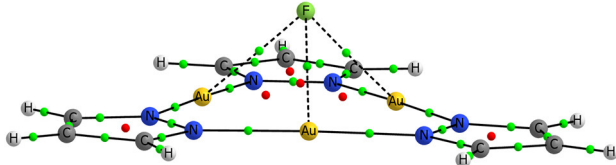 | MP2= -1180.85680735 NIMAG= 0<br>N,0.6800672465,0.020703612,2.6772411945<br>N,-0.680095464,0.0207131258,2.6772512226<br>N,2.6586210257,0.0206972805,-0.7496551245<br>N,1.9785326059,0.0207548899,-1.9275787427<br>N,-1.9785217127,0.0207556484,-1.9275652164<br>N,-2.6586171652,0.0207078801,-0.7496434328<br>C,1.1147408995,0.0304221767,3.9714240123<br>C,-1.1147582901,0.0304488726,3.9714373215<br>C,3.9967489033,0.030356647,-1.0203278597<br>C,2.8819754952,0.0304540065,-2.9511228376<br>C,-2.8819643717,0.0304368725,-2.9511088262<br>C,-3.9967450028,0.0303532959,-1.0203171563<br>C,-0.0000040458,0.0334121437,4.8297495989<br>C,4.1826833671,0.0333523787,-2.4148937257<br>C,-4.1826745365,0.0333362176,-2.4148830743<br>H,2.182800768,0.0350775944,4.1802642143<br>H,-2.1828163869,0.0351310632,4.1802883734<br>H,4.7116521253,0.0349696889,-0.1997915025<br>H,2.5287952349,0.0351721305,-3.9805058387<br>H,-2.5287819455,0.0351462594,-3.9804911429<br>H,-4.7116493384,0.0349724337,-0.1997821784<br>H,0.0000025247,0.0364999114,5.9189289853<br>H,5.1259343636,0.036405956,-2.9594938798<br>H,-5.1259237452,0.0363813632,-2.9594865883<br>Au,1.662557897,-0.0089498858,0.9598766623<br>Au,0.0000025529,-0.0087043843,-1.919637215<br>Au,-1.6625461381,-<br>0.0088957083,0.9598745037<br>F,-0.0000168667,-1.7001114701,-0.0000517468 |
|-----------------------------------------------------------------------------------|--------------------------------------------------------------------------------------------------------------------------------------------------------------------------------------------------------------------------------------------------------------------------------------------------------------------------------------------------------------------------------------------------------------------------------------------------------------------------------------------------------------------------------------------------------------------------------------------------------------------------------------------------------------------------------------------------------------------------------------------------------------------------------------------------------------------------------------------------------------------------------------------------------------------------------------------------------------------------------------------------------------------------------------------------------------------------------------------------------------------------------------------------------------------------------------------------------------------------------------------------------------------------------------------------------------------------------------------------|

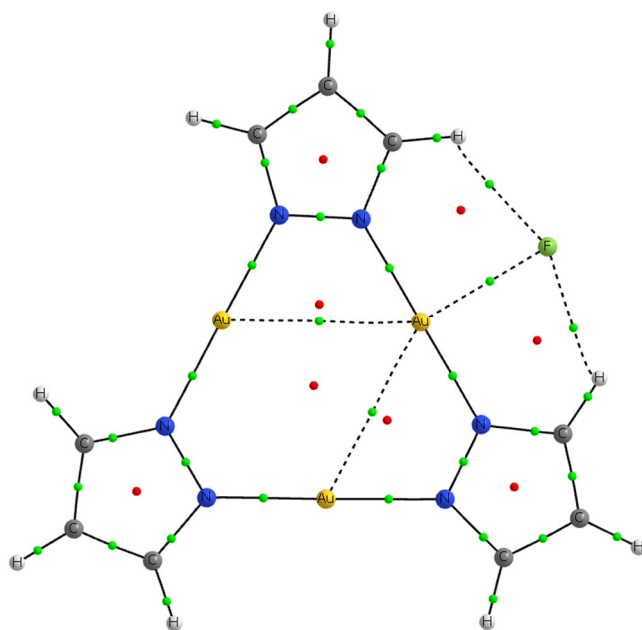

MP2= -1180.86175663 NIMAG= 0  
 N,-0.6805381842,0.,-2.901753165  
 N,0.6805381842,0.,-2.901753165  
 N,-2.7122653698,0.,0.4838306746  
 N,-1.9647988648,0.,1.6182925702  
 N,1.9647988648,0.,1.6182925702  
 N,2.7122653698,0.,0.4838306746  
 C,-1.1146071046,0.,-4.1970082244  
 C,1.1146071046,0.,-4.1970082244  
 C,-4.0343153338,0.,0.8370160136  
 C,-2.7866567754,0.,2.7035545746  
 C,2.7866567754,0.,2.7035545746  
 C,4.0343153338,0.,0.8370160136  
 C,0,0.,-5.0538388065  
 C,-4.1188090253,0.,2.2428321966  
 C,4.1188090253,0.,2.2428321966  
 H,-2.1825935155,0.,-4.4065198157  
 H,2.1825935155,0.,-4.4065198157  
 H,-4.8038071091,0.,0.0663918324  
 H,-2.3088235269,0.,3.6870411416  
 H,2.3088235269,0.,3.6870411416  
 H,4.8038071091,0.,0.0663918324  
 H,0,0.,-6.1426948987  
 H,-5.0269783083,0.,2.8442301969  
 H,5.0269783083,0.,2.8442301969  
 Au,-1.7063229334,0.,-1.2124144914  
 Au,0,0.,1.6110242171  
 Au,1.7063229334,0.,-1.2124144914  
 F,0,0.,4.0452749591

|                                                                                     |                                                                                                                                                                                                                                                                                                                                                                                                                                                                                                                                                                                                                                                                                                                                                                                                                                                                                                                                                                                                                                                                                                                    |
|-------------------------------------------------------------------------------------|--------------------------------------------------------------------------------------------------------------------------------------------------------------------------------------------------------------------------------------------------------------------------------------------------------------------------------------------------------------------------------------------------------------------------------------------------------------------------------------------------------------------------------------------------------------------------------------------------------------------------------------------------------------------------------------------------------------------------------------------------------------------------------------------------------------------------------------------------------------------------------------------------------------------------------------------------------------------------------------------------------------------------------------------------------------------------------------------------------------------|
| 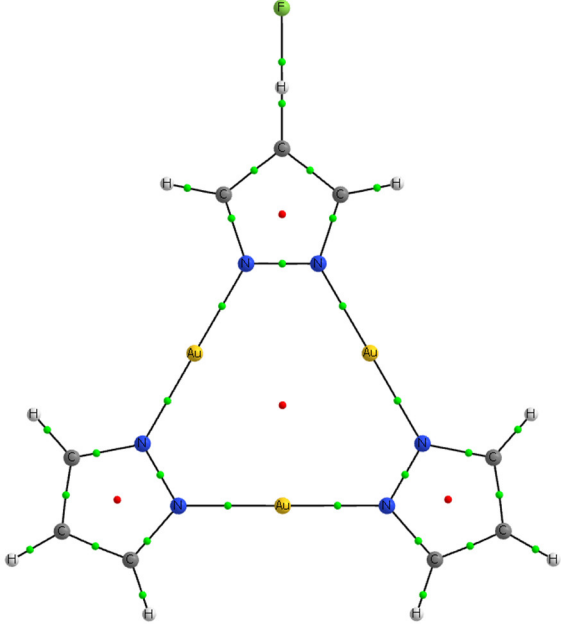  | <p>MP2= -1180.84901612 NIMAG= 0</p> <p>N,-0.6817423849,0,-10.9846909446</p> <p>N,0.6817423849,0,-10.9846909446</p> <p>N,-2.6450200914,0,-7.570781069</p> <p>N,-1.9701430592,0,-6.3902411174</p> <p>N,1.9701430592,0,-6.3902411174</p> <p>N,2.6450200914,0,-7.570781069</p> <p>C,-1.1036318386,0,-12.2929643051</p> <p>C,1.1036318386,0,-12.2929643051</p> <p>C,-3.9830397822,0,-7.3026797254</p> <p>C,-2.8749881659,0,-5.3656722725</p> <p>C,2.8749881659,0,-5.3656722725</p> <p>C,3.9830397822,0,-7.3026797254</p> <p>C,0,0,-13.167228275</p> <p>C,-4.1705610247,0,-5.9087607527</p> <p>C,4.1705610247,0,-5.9087607527</p> <p>H,-2.1732183065,0,-12.502199928</p> <p>H,2.1732183065,0,-12.502199928</p> <p>H,-4.6978362287,0,-8.1235961284</p> <p>H,-2.5268992704,0,-4.3343555262</p> <p>H,2.5268992704,0,-4.3343555262</p> <p>H,4.6978362287,0,-8.1235961284</p> <p>H,0,0,-14.3281221762</p> <p>H,-5.1152255124,0,-5.3677774477</p> <p>H,5.1152255124,0,-5.3677774477</p> <p>Au,-1.6564911013,0,-9.2853007195</p> <p>Au,0,0,-6.3923842803</p> <p>Au,1.6564911013,0,-9.2853007195</p> <p>F,0,0,-15.8361418537</p> |
|  | <p>MP2= -1540.90104623 NIMAG= 0</p> <p>N,0.6791334591,0.0409145135,2.6761106288</p> <p>N,-0.6791501776,0.0408991688,2.6761255902</p> <p>N,2.6571328069,0.0409235545,-0.7499190583</p> <p>N,1.9780206023,0.0408520272,-1.9262518374</p> <p>N,-1.9780230269,0.0408557384,-1.9262450601</p> <p>N,-2.6571486988,0.0409127746,-0.7499170696</p> <p>C,1.1151320133,0.0559309231,3.9696159772</p> <p>C,-1.1151166048,0.0559084439,3.9696415395</p> <p>C,3.9953457447,0.0559952982,-1.0190608908</p> <p>C,2.8802851891,0.0559033678,-2.9505411115</p> <p>C,-2.8802765797,0.055923383,-2.9505443855</p> <p>C,-3.9953570613,0.0559928059,-1.0190786326</p>                                                                                                                                                                                                                                                                                                                                                                                                                                                                   |

|                                                                                     |                                                                                                                                                                                                                                                                                                                                                                                                                                                                                                                                                                                                                                                                                                                                                                                                                                                                                                           |
|-------------------------------------------------------------------------------------|-----------------------------------------------------------------------------------------------------------------------------------------------------------------------------------------------------------------------------------------------------------------------------------------------------------------------------------------------------------------------------------------------------------------------------------------------------------------------------------------------------------------------------------------------------------------------------------------------------------------------------------------------------------------------------------------------------------------------------------------------------------------------------------------------------------------------------------------------------------------------------------------------------------|
|                                                                                     | C,0.0000179467,0.0630167916,4.8272089768<br>C,4.1805156178,0.0630737982,-2.4135672066<br>C,-4.1805122525,0.0630873388,-2.4135866222<br>H,2.1831228715,0.0569284301,4.1790195581<br>H,-2.1831024408,0.0568815921,4.1790708547<br>H,4.7106758671,0.0570321441,-0.1988427799<br>H,2.5276890563,0.0568408038,-3.9801673074<br>H,-2.5276700727,0.0568740461,-3.9801672169<br>H,-4.7106962147,0.0570189297,-0.1988687233<br>H,0.0000308826,0.0672048695,5.9162705407<br>H,5.1236880471,0.0672933134,-2.9580678348<br>H,-5.1236785517,0.067313222,-2.9580979009<br>Au,1.6566973497,0.0049542163,0.9564907548<br>Au,-0.0000023911,0.0047202939,-1.9132023361<br>Au,-1.6567541426,0.0049052654,0.9565217335<br>Cl,0.000000761,-2.3281570539,0.0000498196                                                                                                                                                           |
| 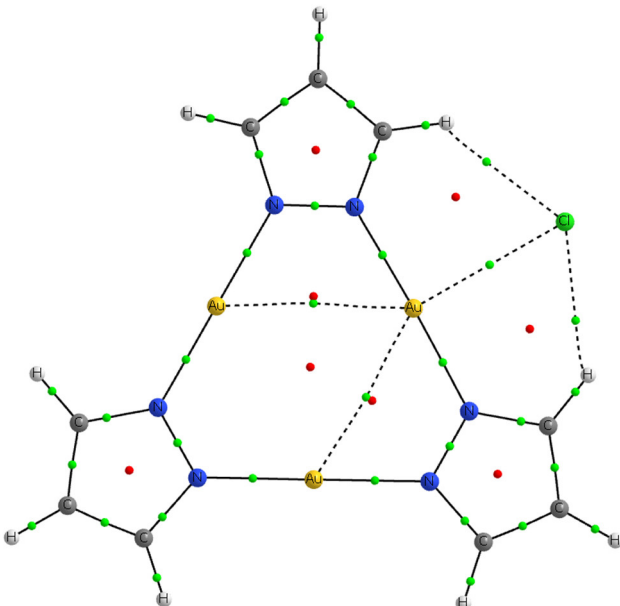 | MP2= -1540.90658571 NIMAG= 0<br>N,-0.6800295939,0,-2.900904195<br>N,0.6800295939,0,-2.900904195<br>N,-2.6755074668,0,0.4990747209<br>N,-1.974810961,0,1.6656834373<br>N,1.974810961,0,1.6656834373<br>N,2.6755074668,0,0.4990747209<br>C,-1.1152629553,0,-4.1954744323<br>C,1.1152629553,0,-4.1954744323<br>C,-4.0117139144,0,0.7916056519<br>C,-2.8519101834,0,2.7094948231<br>C,2.8519101834,0,2.7094948231<br>C,4.0117139144,0,0.7916056519<br>C,0,0,-5.0515590849<br>C,-4.1605125647,0,2.1900271864<br>C,4.1605125647,0,2.1900271864<br>H,-2.1831261166,0,-4.4057981779<br>H,2.1831261166,0,-4.4057981779<br>H,-4.7440168782,0,-0.0144258131<br>H,-2.4435372761,0,3.7224037654<br>H,2.4435372761,0,3.7224037654<br>H,4.7440168782,0,-0.0144258131<br>H,0,0,-6.1403279546<br>H,-5.0929455418,0,2.7525490093<br>H,5.0929455418,0,2.7525490093<br>Au,-1.6786380996,0,-1.197140686<br>Au,0,0,1.6962735372 |

|                                                                                     |                                                                                                                                                                                                                                                                                                                                                                                                                                                                                                                                                                                                                                                                                                                                                                                                                                                                                                                                                                                                                                    |
|-------------------------------------------------------------------------------------|------------------------------------------------------------------------------------------------------------------------------------------------------------------------------------------------------------------------------------------------------------------------------------------------------------------------------------------------------------------------------------------------------------------------------------------------------------------------------------------------------------------------------------------------------------------------------------------------------------------------------------------------------------------------------------------------------------------------------------------------------------------------------------------------------------------------------------------------------------------------------------------------------------------------------------------------------------------------------------------------------------------------------------|
|                                                                                     | <p>Au,1.6786380996,0,-1.197140686<br/>Cl,0,0,4.6521754008</p>                                                                                                                                                                                                                                                                                                                                                                                                                                                                                                                                                                                                                                                                                                                                                                                                                                                                                                                                                                      |
| 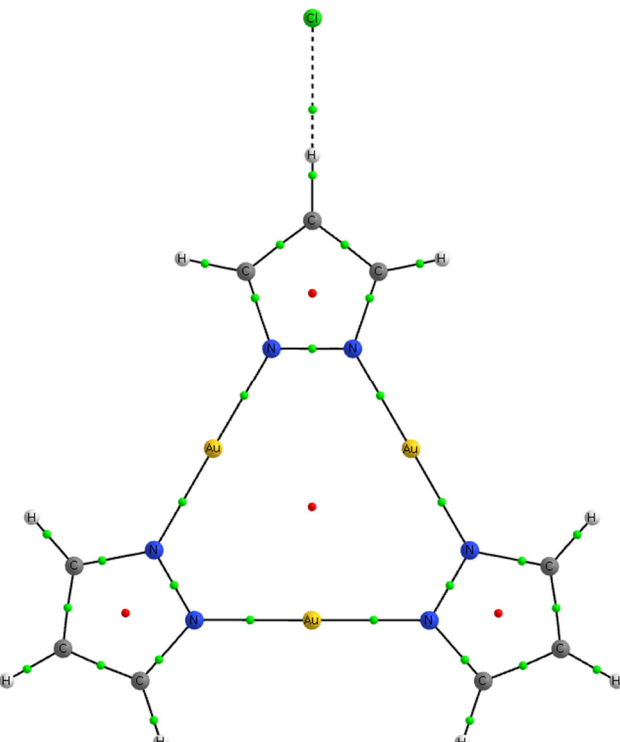  | <p>MP2= -1540.89064026 NIMAG= 0<br/>N,-0.6813723354,0,-10.9619819163<br/>N,0.6813723354,0,-10.9619819163<br/>N,-2.6454968029,0,-7.5483528014<br/>N,-1.9700539529,0,-6.3680210556<br/>N,1.9700539529,0,-6.3680210556<br/>N,2.6454968029,0,-7.5483528014<br/>C,-1.1099880385,0,-12.2642207561<br/>C,1.1099880385,0,-12.2642207561<br/>C,-3.9839844357,0,-7.2809302459<br/>C,-2.8754330233,0,-5.3441366658<br/>C,2.8754330233,0,-5.3441366658<br/>C,3.9839844357,0,-7.2809302459<br/>C,0,0,-13.1247662051<br/>C,-4.1708466642,0,-5.8874204229<br/>C,4.1708466642,0,-5.8874204229<br/>H,-2.1768670309,0,-12.4816004725<br/>H,2.1768670309,0,-12.4816004725<br/>H,-4.6988958259,0,-8.1017221205<br/>H,-2.5277622086,0,-4.3127190274<br/>H,2.5277622086,0,-4.3127190274<br/>H,4.6988958259,0,-8.1017221205<br/>H,0,0,-14.2276318657<br/>H,-5.1154776823,0,-5.346509899<br/>H,5.1154776823,0,-5.346509899<br/>Au,-1.6583011531,0,-9.2604460865<br/>Au,0,0,-6.3687095013<br/>Au,1.6583011531,0,-9.2604460865<br/>Cl,0,0,-16.5446860632</p> |
|  | <p>MP2= -1496.89392137 NIMAG= 0<br/>N,0.6790790892,0.0441667356,2.6764815116<br/>N,-0.6790438176,0.0441885625,2.6764636728<br/>N,2.6574329683,0.0441593065,-0.7501488635<br/>N,1.9783705054,0.0441484121,-1.9263198118<br/>N,-1.9783761278,0.0441511438,-1.9263296663<br/>N,-2.6574264654,0.0441712254,-0.7501539364<br/>C,1.1151915874,0.0622167338,3.9698900571<br/>C,-1.1151929162,0.062275825,3.9698573218<br/>C,3.9956145716,0.062178103,-1.0191561349<br/>C,2.8804177812,0.0622851773,-2.950725146</p>                                                                                                                                                                                                                                                                                                                                                                                                                                                                                                                       |

|                                                                                     |                                                                                                                                                                                                                                                                                                                                                                                                                                                                                                                                                                                                                                                                                                                                                                                                                                              |
|-------------------------------------------------------------------------------------|----------------------------------------------------------------------------------------------------------------------------------------------------------------------------------------------------------------------------------------------------------------------------------------------------------------------------------------------------------------------------------------------------------------------------------------------------------------------------------------------------------------------------------------------------------------------------------------------------------------------------------------------------------------------------------------------------------------------------------------------------------------------------------------------------------------------------------------------|
|                                                                                     | C,-2.8804305287,0.0622400209,-2.9507289929<br>C,-3.9956118529,0.0621969962,-1.0191451916<br>C,-0.0000132154,0.0712658848,4.8272752646<br>C,4.1805457366,0.071260564,-2.4136430009<br>C,-4.1805538903,0.0712298817,-2.4136330946<br>H,2.1831693482,0.0627609479,4.179370444<br>H,-2.1831772571,0.0628752128,4.1793053581<br>H,4.7110056696,0.0627079819,-0.1989895608<br>H,2.5278236272,0.0629140782,-3.9803536402<br>H,-2.5278435449,0.0628317387,-3.9803603786<br>H,-4.7109977733,0.0627502617,-0.1989740611<br>H,-0.0000285735,0.0774969336,5.9163278347<br>H,5.1236910163,0.0775078276,-2.9581719932<br>H,-5.1237037935,0.077453385,-2.9581546161<br>Au,1.6546940839,0.0033546417,0.9553364625<br>Au,0.0000004386,0.0033692737,-1.9106406359<br>Au,-1.6546275076,0.0034061066,0.9553014204<br>Br,-0.0000091593,-2.4715629615,0.0000193774 |
| 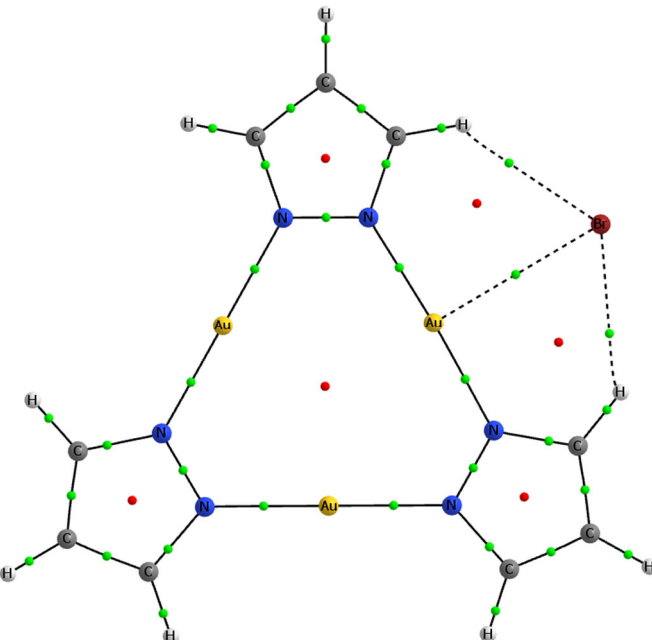 | MP2= -1496.89712782 NIMAG= 0<br>N,-0.6799415778,0,-2.9041356498<br>N,0.6799415778,0,-2.9041356498<br>N,-2.6647602565,0,0.500187961<br>N,-1.977698692,0,1.6752873451<br>N,1.977698692,0,1.6752873451<br>N,2.6647602565,0,0.500187961<br>C,-1.1154601618,0,-4.1984920349<br>C,1.1154601618,0,-4.1984920349<br>C,-4.0046532122,0,0.7753721996<br>C,-2.87011039,0,2.7067754625<br>C,2.87011039,0,2.7067754625<br>C,4.0046532122,0,0.7753721996<br>C,0,0,-5.0543777982<br>C,-4.1716473105,0,2.1711684112<br>C,4.1716473105,0,2.1711684112<br>H,-2.1832913314,0,-4.4090257566<br>H,2.1832913314,0,-4.4090257566<br>H,-4.7259684313,0,-0.0405062555<br>H,-2.4809834614,0,3.7265672563<br>H,2.4809834614,0,3.7265672563<br>H,4.7259684313,0,-0.0405062555<br>H,0,0,-6.1431297378<br>H,-5.1106122131,0,2.7225981654<br>H,5.1106122131,0,2.7225981654  |



|                                                                                     |                                                                                                                                                                                                                                                                                                                                                                                                                                                                                                                                                                                                                                                                                                                                                                                                                                                                                                                                                                                                                                                                                                                        |
|-------------------------------------------------------------------------------------|------------------------------------------------------------------------------------------------------------------------------------------------------------------------------------------------------------------------------------------------------------------------------------------------------------------------------------------------------------------------------------------------------------------------------------------------------------------------------------------------------------------------------------------------------------------------------------------------------------------------------------------------------------------------------------------------------------------------------------------------------------------------------------------------------------------------------------------------------------------------------------------------------------------------------------------------------------------------------------------------------------------------------------------------------------------------------------------------------------------------|
|                                                                                     | <p>Au,-1.6696137474,0,-1.195647327</p> <p>Au,0,0,1.720120019</p> <p>Au,1.6696137474,0,-1.195647327</p> <p>Br,0,0,4.8078404413</p>                                                                                                                                                                                                                                                                                                                                                                                                                                                                                                                                                                                                                                                                                                                                                                                                                                                                                                                                                                                      |
| 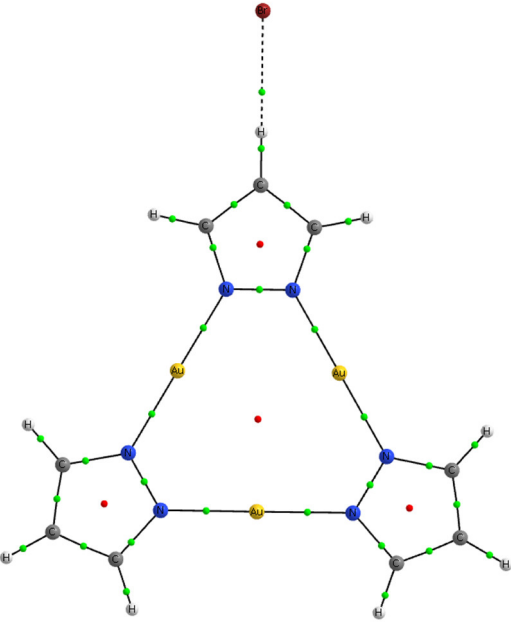  | <p>MP2= -1496.88058761 NIMAG= 0</p> <p>N,-0.6813253646,0,-10.9556529581</p> <p>N,0.6813253646,0,-10.9556529581</p> <p>N,-2.6456935127,0,-7.5422218716</p> <p>N,-1.9700219437,0,-6.3619681489</p> <p>N,1.9700219437,0,-6.3619681489</p> <p>N,2.6456935127,0,-7.5422218716</p> <p>C,-1.110692007,0,-12.2570548574</p> <p>C,1.110692007,0,-12.2570548574</p> <p>C,-3.9841658867,0,-7.2747882984</p> <p>C,-2.8753366232,0,-5.3381525634</p> <p>C,2.8753366232,0,-5.3381525634</p> <p>C,3.9841658867,0,-7.2747882984</p> <p>C,0,0,-13.1161399088</p> <p>C,-4.1708017307,0,-5.8813133964</p> <p>C,4.1708017307,0,-5.8813133964</p> <p>H,-2.1773302748,0,-12.4752413468</p> <p>H,2.1773302748,0,-12.4752413468</p> <p>H,-4.6992931158,0,-8.0953920697</p> <p>H,-2.5277677101,0,-4.3067023202</p> <p>H,2.5277677101,0,-4.3067023202</p> <p>H,4.6992931158,0,-8.0953920697</p> <p>H,0,0,-14.2153091476</p> <p>H,-5.1153582886,0,-5.3403102295</p> <p>H,5.1153582886,0,-5.3403102295</p> <p>Au,-1.6587344432,0,-9.2539238953</p> <p>Au,0,0,-6.3626603619</p> <p>Au,1.6587344432,0,-9.2539238953</p> <p>Br,0,0,-16.7223632501</p> |
|  | <p>MP2= -1280.43876196 NIMAG= 0</p> <p>N,0.680801075,0.0000406471,2.6877643192</p> <p>N,-0.6807698315,0.0000411467,2.687742417</p> <p>N,2.6680693575,0.0000407693,-0.7542951074</p> <p>N,1.9872696181,0.0000415996,-1.9334423943</p> <p>N,-1.987273836,0.0000420215,-1.9334505207</p> <p>N,-2.668059839,0.0000417293,-0.7543011606</p> <p>C,1.1139576191,-0.0000251536,3.9823463441</p> <p>C,-1.1139678772,-0.0000286708,3.9823111553</p>                                                                                                                                                                                                                                                                                                                                                                                                                                                                                                                                                                                                                                                                              |



|                                                                                    |                                                                                                                                                                                                                                                                                                                                                                                                                                                                                                                                                                                                                                                                                                                                                                                                                                                                                                                                                                                                                                                           |
|------------------------------------------------------------------------------------|-----------------------------------------------------------------------------------------------------------------------------------------------------------------------------------------------------------------------------------------------------------------------------------------------------------------------------------------------------------------------------------------------------------------------------------------------------------------------------------------------------------------------------------------------------------------------------------------------------------------------------------------------------------------------------------------------------------------------------------------------------------------------------------------------------------------------------------------------------------------------------------------------------------------------------------------------------------------------------------------------------------------------------------------------------------|
|                                                                                    | H,0.1059506772,0.0003593825,5.838531812<br>H,5.2126563048,-0.0000184226,-3.0095839055<br>H,-5.0033506744,-0.0004508993,-3.0110130793<br>Au,1.7807547389,0.0007475611,0.9225631244<br>Au,0.0913937432,-0.0007244466,-2.0034927909<br>Au,-1.5334333899,-0.0000342421,0.8853289813<br>F,3.8282555425,0.001239914,4.8442881858<br>F,-2.2808435487,-0.0010759437,-5.7374404209                                                                                                                                                                                                                                                                                                                                                                                                                                                                                                                                                                                                                                                                                 |
| 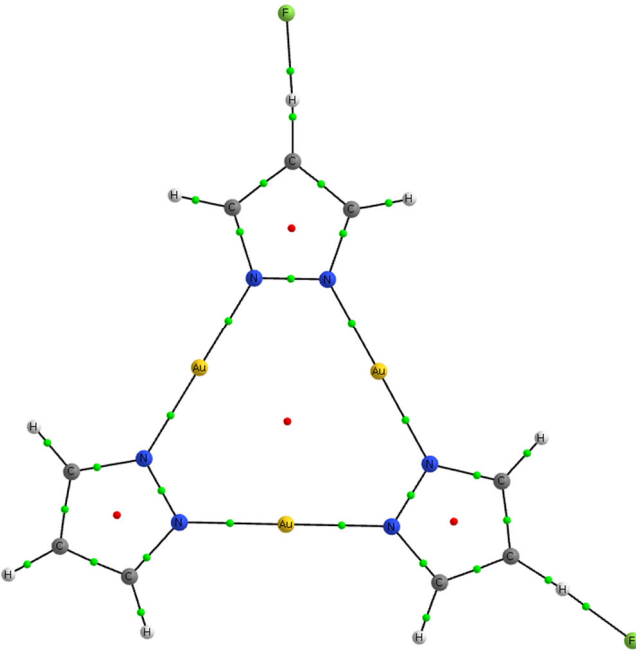 | MP2= -1280.49691184 NIMAG= 0<br>N,0.6797695543,0.,2.6247512181<br>N,-0.6797695543,0.,2.6247512181<br>N,2.6530586093,0.,-0.7840201386<br>N,1.9735077384,0.,-1.9654095233<br>N,-1.9735077384,0.,-1.9654095233<br>N,-2.6530586093,0.,-0.7840201386<br>C,1.1157371754,0.,3.9189321511<br>C,-1.1157371754,0.,3.9189321511<br>C,3.9987441967,0.,-1.0627757567<br>C,2.8999013703,0.,-2.9790886579<br>C,-2.8999013703,0.,-2.9790886579<br>C,-3.9987441967,0.,-1.0627757567<br>C,0.,0.,4.775532096<br>C,4.2083214005,0.,-2.4540273994<br>C,-4.2083214005,0.,-2.4540273994<br>H,2.1839552952,0.,4.1284608808<br>H,-2.1839552952,0.,4.1284608808<br>H,4.7120422376,0.,-0.2390412002<br>H,2.5496945308,0.,-4.0109710322<br>H,-2.5496945308,0.,-4.0109710322<br>H,-4.7120422376,0.,-0.2390412002<br>H,0.,0.,5.8645075721<br>H,5.2099943509,0.,-2.9981302799<br>H,-5.2099943509,0.,-2.9981302799<br>Au,1.6681122205,0.,0.9104484719<br>Au,0.,0.,-1.967448798<br>Au,-1.6681122205,0.,0.9104484719<br>F,6.6800955163,0.,-3.6754241619<br>F,-6.6800955163,0.,-3.6754241619 |

|                                                                                    |                                             |
|------------------------------------------------------------------------------------|---------------------------------------------|
| 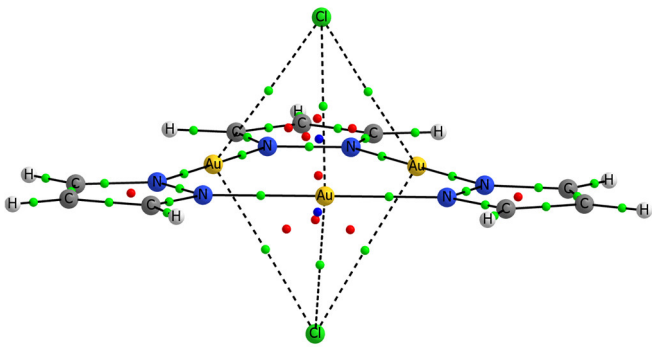 | MP2= -2000.54233916 NIMAG= 0                |
|                                                                                    | N,0.6785309248,0.0003302024,2.6789712236    |
|                                                                                    | N,-0.6785344739,0.0003290561,2.6789732484   |
|                                                                                    | N,2.659350029,0.0003290934,-0.7518481976    |
|                                                                                    | N,1.9808034823,0.0003290921,-1.927103221    |
|                                                                                    | N,-1.9808037444,0.0003291708,-1.9271095307  |
|                                                                                    | N,-2.6593390742,0.0003286271,-0.7518538834  |
|                                                                                    | C,1.1146007668,-0.0000477272,3.9718196556   |
|                                                                                    | C,-1.1146125066,-0.0000481927,3.9718193347  |
|                                                                                    | C,3.9970235422,-0.0000502917,-1.0206350747  |
|                                                                                    | C,2.8823999683,-0.0000484631,-2.9511844214  |
|                                                                                    | C,-2.8824058055,-0.0000449124,-2.9511863222 |
|                                                                                    | C,-3.99701388,-0.0000531031,-1.0206309493   |
|                                                                                    | C,-0.000006813,-0.0002911325,4.8331485481   |
|                                                                                    | C,4.1856395537,-0.0002932144,-2.4165793417  |
|                                                                                    | C,-4.1856420839,-0.0002920691,-2.4165735405 |
|                                                                                    | H,2.1833068222,-0.0000762689,4.1781341891   |
|                                                                                    | H,-2.1833185108,-0.0000770926,4.1781300793  |
|                                                                                    | H,4.7100585622,-0.0000800736,-0.1982735793  |
|                                                                                    | H,2.5267143972,-0.0000768117,-3.9798660211  |
|                                                                                    | H,-2.5267266871,-0.0000699783,-3.9798701746 |
|                                                                                    | H,-4.7100409899,-0.0000856077,-0.1982629463 |
|                                                                                    | H,-0.0000071352,-0.0006106709,5.9232601136  |
|                                                                                    | H,5.1296989183,-0.0006137176,-2.9616430653  |
|                                                                                    | H,-5.1297062396,-0.0006116459,-2.9616293345 |
|                                                                                    | Au,1.6535157977,0.0004485543,0.9546538862   |
|                                                                                    | Au,0.0000008864,0.0004476528,-1.9092965694  |
|                                                                                    | Au,-1.653495878,0.0004473604,0.9546445105   |
|                                                                                    | Cl,0.000005191,-2.5993979209,-0.0000037783  |
|                                                                                    | Cl,0.00000498,2.5995500848,-0.0000048376    |

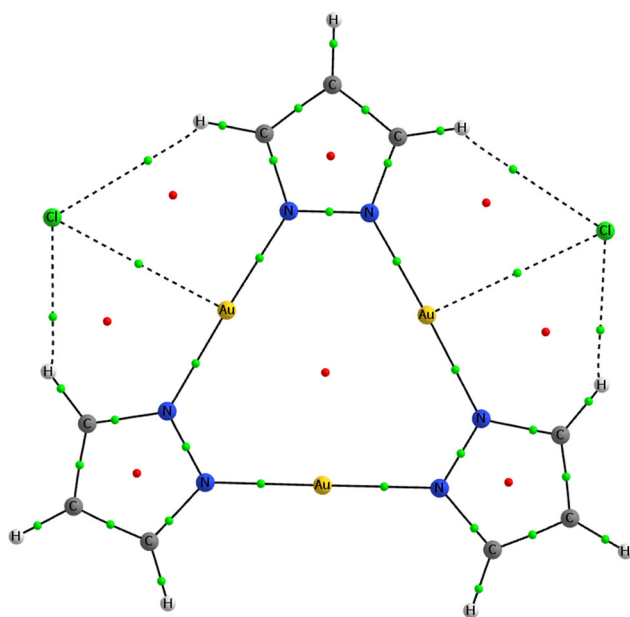

MP2= -2000.58638473 NIMAG= 0  
 N,0.679844882,0.,2.6645211497  
 N,-0.681662146,0.,2.6750318589  
 N,2.6537616825,0.,-0.7459004026  
 N,1.9728495386,0.,-1.9252748313  
 N,-1.9676205636,0.,-1.9210235133  
 N,-2.6574766187,0.,-0.7471791942  
 C,1.1402074536,0.,3.9474736577  
 C,-1.1022962184,0.,3.9770683242  
 C,3.9931574115,0.,-1.007086633  
 C,2.8687413137,0.,-2.9546324432  
 C,-2.8485087415,0.,-2.9611854493  
 C,-3.9953903105,0.,-1.0339176345  
 C,0.0291514412,0.,4.8144956461  
 C,4.1670570042,0.,-2.4058514831  
 C,-4.1548998154,0.,-2.4324937117  
 H,2.2236709548,0.,4.1019994462  
 H,-2.1682756859,0.,4.2006186325  
 H,4.6871343892,0.,-0.1640810516  
 H,2.4856655535,0.,-3.9771369262  
 H,-2.4406002494,0.,-3.9767552596  
 H,-4.7219802903,0.,-0.2225274899  
 H,0.0426637282,0.,5.9039298866  
 H,5.1106732541,0.,-2.950648579  
 H,-5.0916213998,0.,-2.9889128158  
 Au,1.6909049046,0.,0.9721813211  
 Au,0.0035187311,0.,-1.9504572633  
 Au,-1.6698370054,0.,0.9640808446  
 Cl,4.4658659502,0.,2.8043829841  
 Cl,-0.1957339311,0.,-5.2697448549

|                                                                                    |                                                                                                                                                                                                                                                                                                                                                                                                                                                                                                                                                                                                                                                                                                                                                                                                                                                                                                                                                                                                                                                       |
|------------------------------------------------------------------------------------|-------------------------------------------------------------------------------------------------------------------------------------------------------------------------------------------------------------------------------------------------------------------------------------------------------------------------------------------------------------------------------------------------------------------------------------------------------------------------------------------------------------------------------------------------------------------------------------------------------------------------------------------------------------------------------------------------------------------------------------------------------------------------------------------------------------------------------------------------------------------------------------------------------------------------------------------------------------------------------------------------------------------------------------------------------|
| 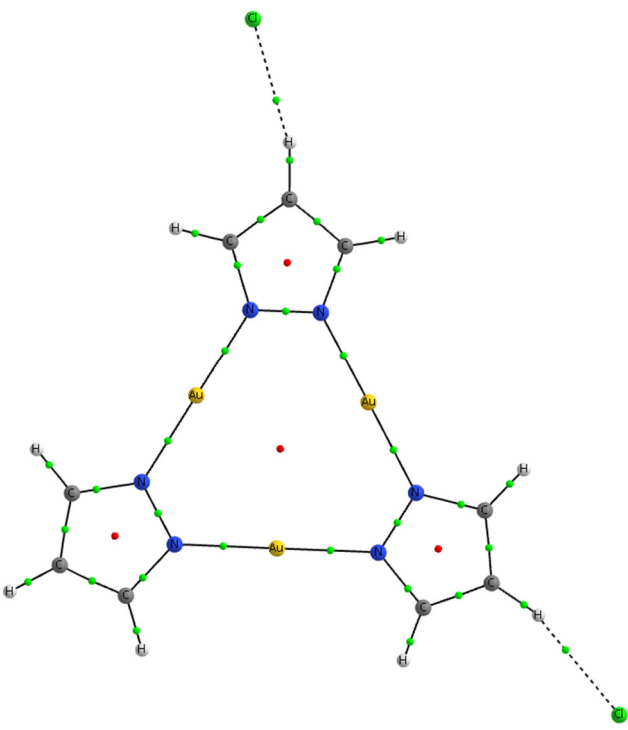 | MP2= -2000.58945267 NIMAG= 0<br>N,0.6798275862,0.,2.6059666934<br>N,-0.6798275862,0.,2.6059666934<br>N,2.6524598057,0.,-0.8032712627<br>N,1.9725453828,0.,-1.9838947602<br>N,-1.9725453828,0.,-1.9838947602<br>N,-2.6524598057,0.,-0.8032712627<br>C,1.1158976055,0.,3.9000387726<br>C,-1.1158976055,0.,3.9000387726<br>C,3.9955995458,0.,-1.0751908367<br>C,2.8903879858,0.,-3.0015818101<br>C,-2.8903879858,0.,-3.0015818101<br>C,-3.9955995458,0.,-1.0751908367<br>C,0.,0.,4.7556351544<br>C,4.1906058329,0.,-2.4654578701<br>C,-4.1906058329,0.,-2.4654578701<br>H,2.1839443694,0.,4.1102560926<br>H,-2.1839443694,0.,4.1102560926<br>H,4.7182899512,0.,-0.261135622<br>H,2.5434327854,0.,-4.0336615929<br>H,-2.5434327854,0.,-4.0336615929<br>H,-4.7182899512,0.,-0.261135622<br>H,0.,0.,5.8444029805<br>H,5.1608168895,0.,-2.9803102775<br>H,-5.1608168895,0.,-2.9803102775<br>Au,1.66689024,0.,0.8941438039<br>Au,0.,0.,-1.9861368901<br>Au,-1.66689024,0.,0.8941438039<br>Cl,7.591113127,0.,-3.4628519509<br>Cl,-7.591113127,0.,-3.4628519509 |
|------------------------------------------------------------------------------------|-------------------------------------------------------------------------------------------------------------------------------------------------------------------------------------------------------------------------------------------------------------------------------------------------------------------------------------------------------------------------------------------------------------------------------------------------------------------------------------------------------------------------------------------------------------------------------------------------------------------------------------------------------------------------------------------------------------------------------------------------------------------------------------------------------------------------------------------------------------------------------------------------------------------------------------------------------------------------------------------------------------------------------------------------------|

|                                                                                     |                                                                                                                                                                                                                                                                                                                                                                                                                                                                                                                                                |
|-------------------------------------------------------------------------------------|------------------------------------------------------------------------------------------------------------------------------------------------------------------------------------------------------------------------------------------------------------------------------------------------------------------------------------------------------------------------------------------------------------------------------------------------------------------------------------------------------------------------------------------------|
| 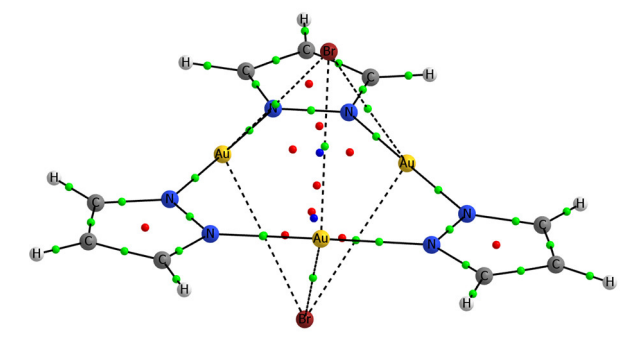 | MP2= -1912.53243794 NIMAG= 0<br>N,0.6783435936,-0.0001340144,2.6788140394<br>N,-0.6783394473,-0.0001322153,2.6788112177<br>N,2.6590856906,-0.0001235768,-0.751954584<br>N,1.9807566943,-0.000117549,-1.9268792413<br>N,-1.980761903,-0.0001167982,-1.9268734286<br>N,-2.6590977213,-0.0001286461,-0.7519508221<br>C,1.114776051,0.000027442,3.9714324148<br>C,-1.1147699011,0.0000071632,3.9714289798<br>C,3.9967463756,0.0000469967,-1.0202858381<br>C,2.8819972877,0.0000229508,-2.9511350362<br>C,-2.8819930104,-0.0000251285,-2.9511359636 |
|-------------------------------------------------------------------------------------|------------------------------------------------------------------------------------------------------------------------------------------------------------------------------------------------------------------------------------------------------------------------------------------------------------------------------------------------------------------------------------------------------------------------------------------------------------------------------------------------------------------------------------------------|

|                                                                                     |                                                                                                                                                                                                                                                                                                                                                                                                                                                                                                                                                                                                                                                                                                                                                                                                                                                                                                     |
|-------------------------------------------------------------------------------------|-----------------------------------------------------------------------------------------------------------------------------------------------------------------------------------------------------------------------------------------------------------------------------------------------------------------------------------------------------------------------------------------------------------------------------------------------------------------------------------------------------------------------------------------------------------------------------------------------------------------------------------------------------------------------------------------------------------------------------------------------------------------------------------------------------------------------------------------------------------------------------------------------------|
|                                                                                     | C,-3.9967560911,0.0000871162,-1.0202855144<br>C,0.0000029875,0.0000943106,4.8322873768<br>C,4.1849032482,0.0001152348,-2.4161315852<br>C,-4.1849013853,0.0001102815,-2.4161341614<br>H,2.1834471119,0.0000512079,4.1778131506<br>H,-2.1834406132,0.0000121366,4.1778071788<br>H,4.7098012946,0.0000735097,-0.1979710099<br>H,2.5264013141,0.0000275493,-3.9798234914<br>H,-2.5263922479,-0.0000614881,-3.979822922<br>H,-4.7098159221,0.0001539003,-0.197973756<br>H,0.0000029009,0.000204246,5.9223122338<br>H,5.1288986643,0.0002296685,-2.9611346486<br>H,-5.1288936438,0.0002233463,-2.9611413547<br>Au,1.6504818999,-0.0001578454,0.9528997361<br>Au,-0.0000033128,-0.0001470967,-1.9058459253<br>Au,-1.6504790816,-0.0001587563,0.952894484<br>Br,0.0000001176,-2.7416251275,-0.000019256<br>Br,-0.000000951,2.7414411814,-0.0000022727                                                       |
| 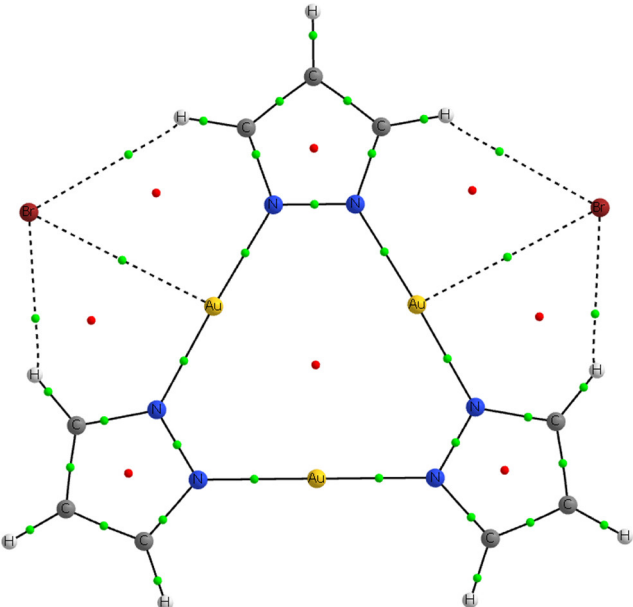 | MP2= -1912.57058889 NIMAG= 0<br>N,0.6788265939,0.,2.6714444986<br>N,-0.6826812415,0.,2.6741653113<br>N,2.6498344328,0.,-0.7433273148<br>N,1.9686575543,0.,-1.9231602773<br>N,-1.9741255036,0.,-1.9236033245<br>N,-2.6572357143,0.,-0.7458633578<br>C,1.128938146,0.,3.9583618181<br>C,-1.1124373799,0.,3.9729870007<br>C,3.989456589,0.,-1.0053628925<br>C,2.8653980994,0.,-2.9522893071<br>C,-2.8635728188,0.,-2.9568700228<br>C,-3.9969263614,0.,-1.0230944693<br>C,0.0127954484,0.,4.8180176191<br>C,4.1629379957,0.,-2.4034733724<br>C,-4.1661279299,0.,-2.420089993<br>H,2.2089632766,0.,4.1282435834<br>H,-2.1799410458,0.,4.1888723187<br>H,4.6857744044,0.,-0.1645603222<br>H,2.4854006217,0.,-3.9757195095<br>H,-2.4706821779,0.,-3.9771401053<br>H,-4.7176403641,0.,-0.206551835<br>H,0.0198746446,0.,5.9073987589<br>H,5.1064469711,0.,-2.9482085334<br>H,-5.1060200732,0.,-2.9709113267 |

|                                                                                    |                                                                                                                                                                                                                                                                                                                                                                                                                                                                                                                                                                                                                                                                                                                                                                                                                                                                                                                                                                                                                                                                                                                          |
|------------------------------------------------------------------------------------|--------------------------------------------------------------------------------------------------------------------------------------------------------------------------------------------------------------------------------------------------------------------------------------------------------------------------------------------------------------------------------------------------------------------------------------------------------------------------------------------------------------------------------------------------------------------------------------------------------------------------------------------------------------------------------------------------------------------------------------------------------------------------------------------------------------------------------------------------------------------------------------------------------------------------------------------------------------------------------------------------------------------------------------------------------------------------------------------------------------------------|
|                                                                                    | <p> Au,1.6909096052,0.,0.9775995718<br/> Au,-0.0011712613,0.,-1.9531704595<br/> Au,-1.6658560965,0.,0.9617824657<br/> Br,4.6071927542,0.,2.8308873143<br/> Br,-0.1480239522,0.,-5.4053896224 </p>                                                                                                                                                                                                                                                                                                                                                                                                                                                                                                                                                                                                                                                                                                                                                                                                                                                                                                                        |
| 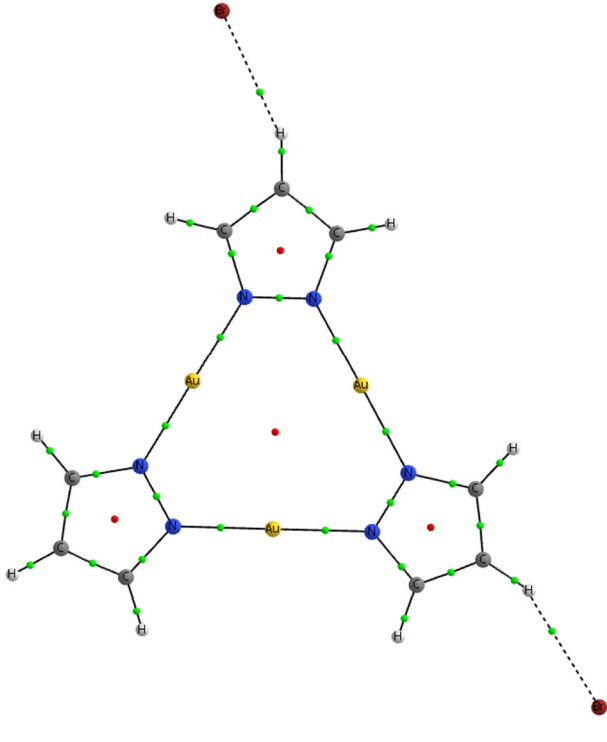 | <p> MP2= -1912.57112067 NIMAG= 0<br/> N,0.6798731457,0.,2.5800906973<br/> N,-0.6798731457,0.,2.5800906973<br/> N,2.6542162787,0.,-0.828334765<br/> N,1.9721604397,0.,-2.0077635252<br/> N,-1.9721604397,0.,-2.0077635252<br/> N,-2.6542162787,0.,-0.828334765<br/> C,1.1159287103,0.,3.8741531808<br/> C,-1.1159287103,0.,3.8741531808<br/> C,3.9965665053,0.,-1.100971359<br/> C,2.8871191642,0.,-3.0274678956<br/> C,-2.8871191642,0.,-3.0274678956<br/> C,-3.9965665053,0.,-1.100971359<br/> C,0.,0.,4.7295617914<br/> C,4.1867672155,0.,-2.491476628<br/> C,-4.1867672155,0.,-2.491476628<br/> H,2.1839667005,0.,4.084443362<br/> H,-2.1839667005,0.,4.084443362<br/> H,4.7241893787,0.,-0.2914294956<br/> H,2.5379982211,0.,-4.0587453654<br/> H,-2.5379982211,0.,-4.0587453654<br/> H,-4.7241893787,0.,-0.2914294956<br/> H,0.,0.,5.8182948907<br/> H,5.1560172542,0.,-3.0006458446<br/> H,-5.1560172542,0.,-3.0006458446<br/> Au,1.6681040204,0.,0.8694980197<br/> Au,0.,0.,-2.0089299144<br/> Au,-1.6681040204,0.,0.8694980197<br/> Br,7.8494902795,0.,-3.1208137654<br/> Br,-7.8494902795,0.,-3.1208137654 </p> |



|                                                                                    |                               |
|------------------------------------------------------------------------------------|-------------------------------|
| 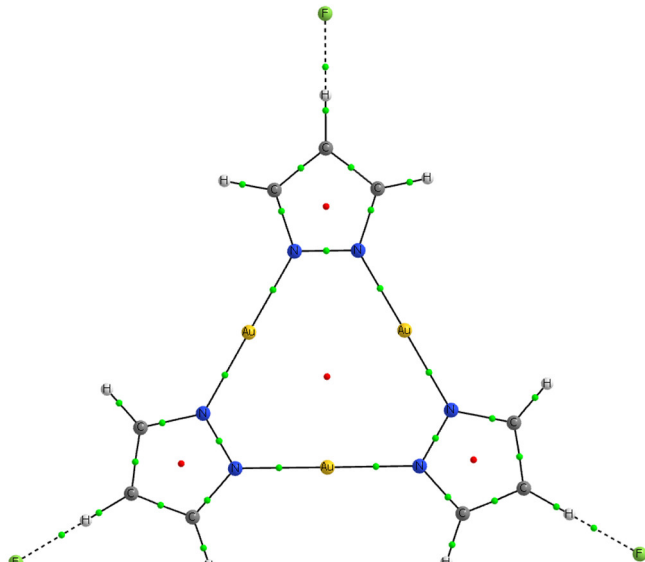 | MP2= -1380.09592555 NIMAG= 0  |
|                                                                                    | X                             |
|                                                                                    | X,1,r21                       |
|                                                                                    | X,1,r21,2,120.                |
|                                                                                    | X,1,r21,2,120.,3,180.,0       |
|                                                                                    | N,2,r52,1,90.,3,0.,0          |
|                                                                                    | N,2,r52,1,90.,4,0.,0          |
|                                                                                    | N,3,r52,1,90.,2,0.,0          |
|                                                                                    | N,3,r52,1,90.,4,0.,0          |
|                                                                                    | N,4,r52,1,90.,3,0.,0          |
|                                                                                    | N,4,r52,1,90.,2,0.,0          |
|                                                                                    | C,5,r115,2,a1152,1,180.,0     |
|                                                                                    | C,6,r115,2,a1152,1,180.,0     |
|                                                                                    | C,7,r115,3,a1152,1,180.,0     |
|                                                                                    | C,8,r115,3,a1152,1,180.,0     |
|                                                                                    | C,9,r115,4,a1152,1,180.,0     |
|                                                                                    | C,10,r115,4,a1152,1,180.,0    |
|                                                                                    | C,1,r171,3,120.,2,0.,0        |
|                                                                                    | C,1,r171,4,120.,3,0.,0        |
|                                                                                    | C,1,r171,2,120.,4,0.,0        |
|                                                                                    | H,11,r2011,5,a20115,2,180.,0  |
|                                                                                    | H,12,r2011,6,a20115,2,180.,0  |
|                                                                                    | H,13,r2011,7,a20115,3,180.,0  |
|                                                                                    | H,14,r2011,8,a20115,3,180.,0  |
|                                                                                    | H,15,r2011,9,a20115,4,180.,0  |
|                                                                                    | H,16,r2011,10,a20115,4,180.,0 |
|                                                                                    | H,1,r261,3,120.,2,0.,0        |
|                                                                                    | H,1,r261,4,120.,3,0.,0        |
|                                                                                    | H,1,r261,2,120.,4,0.,0        |
|                                                                                    | Au,1,r291,3,60.,2,0.,0        |
|                                                                                    | Au,1,r291,4,60.,3,0.,0        |
|                                                                                    | Au,1,r291,2,60.,4,0.,0        |
|                                                                                    | F,1,rf,29,60.,2,180.,0        |
| F,1,rf,30,60.,3,180.,0                                                             |                               |
| F,1,rf,31,60.,4,180.,0                                                             |                               |
| r21=2.67223497                                                                     |                               |
| r52=0.68119758                                                                     |                               |
| r115=1.37313143                                                                    |                               |
| r171=4.8522309                                                                     |                               |
| r2011=1.08955811                                                                   |                               |
| r261=5.97840667                                                                    |                               |
| r291=1.9254901                                                                     |                               |

|                                                                                    |                                                                                                                                                                                                                                                                                                                                                                                                                                                                                                                                                                                                                                                                                                                                                                                                                                                                                                                                                                                                                                                                                     |
|------------------------------------------------------------------------------------|-------------------------------------------------------------------------------------------------------------------------------------------------------------------------------------------------------------------------------------------------------------------------------------------------------------------------------------------------------------------------------------------------------------------------------------------------------------------------------------------------------------------------------------------------------------------------------------------------------------------------------------------------------------------------------------------------------------------------------------------------------------------------------------------------------------------------------------------------------------------------------------------------------------------------------------------------------------------------------------------------------------------------------------------------------------------------------------|
|                                                                                    | a1152=107.98694139<br>a20115=119.02515627<br>rf=7.71367068                                                                                                                                                                                                                                                                                                                                                                                                                                                                                                                                                                                                                                                                                                                                                                                                                                                                                                                                                                                                                          |
| 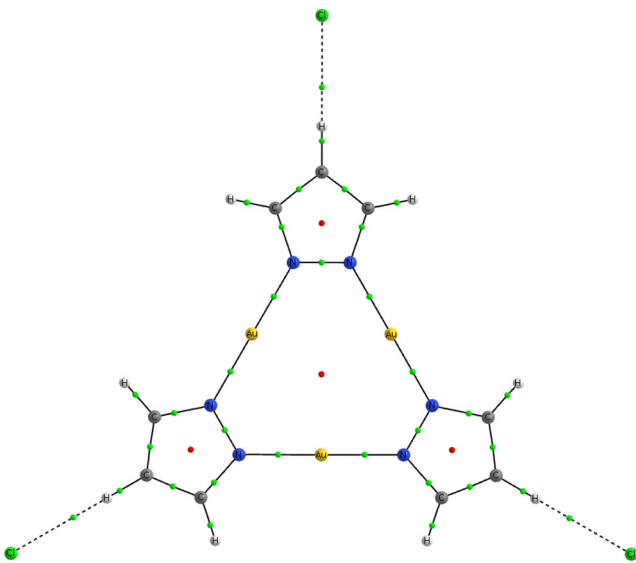 | MP2= -2460.24657873 NIMAG= 0<br>N,0.6809545795,0.,2.6708887047<br>N,-0.6809545795,0.,2.6708887047<br>N,2.6535343801,0.,-0.7457160323<br>N,1.9725707821,0.,-1.9251550129<br>N,-1.9725707821,0.,-1.9251550129<br>N,-2.6535343801,0.,-0.7457160323<br>C,1.1104970093,0.,3.9718823012<br>C,-1.1104970093,0.,3.9718823012<br>C,3.9949963361,0.,-1.0242276463<br>C,2.884482493,0.,-2.9476558113<br>C,-2.884482493,0.,-2.9476558113<br>C,-3.9949963361,0.,-1.0242276463<br>C,0.,0.,4.8345613364<br>C,4.1868381436,0.,-2.4172886348<br>C,-4.1868381436,0.,-2.4172886348<br>H,2.1779046615,0.,4.1862413399<br>H,-2.1779046615,0.,4.1862413399<br>H,4.7143456034,0.,-0.2070098031<br>H,2.5364101413,0.,-3.9792348591<br>H,-2.5364101413,0.,-3.9792348591<br>H,-4.7143456034,0.,-0.2070098031<br>H,0.,0.,5.931778746<br>H,5.1370516344,0.,-2.9659053312<br>H,-5.1370516344,0.,-2.9659053312<br>Au,1.6666696574,0.,0.9622554284<br>Au,0.,0.,-1.9244509373<br>Au,-1.6666696574,0.,0.9622554284<br>Cl,7.4330396688,0.,-4.2915000533<br>Cl,-7.4330396688,0.,-4.2915000533<br>Cl,0.,0.,8.5829626372 |

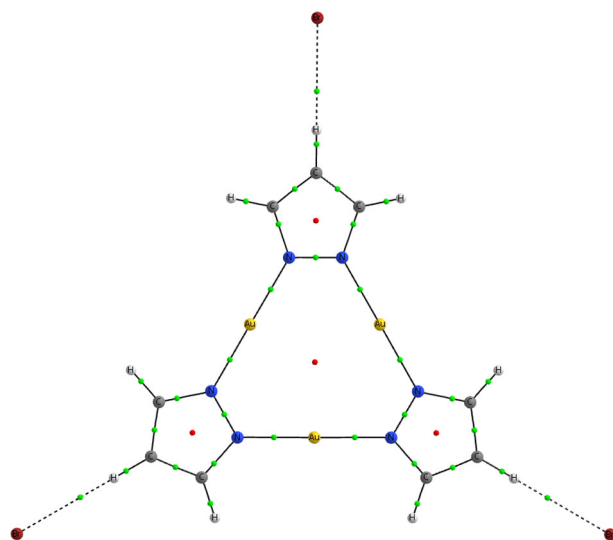

MP2= -2328.22079785 NIMAG= 0  
 N,0.6809022065,0.,2.6706431794  
 N,-0.6809022065,0.,2.6706431794  
 N,2.6532521419,0.,-0.7456156703  
 N,1.972361616,0.,-1.9249712234  
 N,-1.972361616,0.,-1.9249712234  
 N,-2.6532521419,0.,-0.7456156703  
 C,1.111158652,0.,3.9709343812  
 C,-1.111158652,0.,3.9709343812  
 C,3.9944678786,0.,-1.0231373157  
 C,2.8833283452,0.,-2.9477237733  
 C,-2.8833283452,0.,-2.9477237733  
 C,-3.9944678786,0.,-1.0231373157  
 C,0.,0.,4.832264871  
 C,4.1848387154,0.,-2.416090735  
 C,-4.1848387154,0.,-2.416090735  
 H,2.178382374,0.,4.1858492613  
 H,-2.178382374,0.,4.1858492613  
 H,4.7141934085,0.,-0.2063440108  
 H,2.535852057,0.,-3.9794301828  
 H,-2.535852057,0.,-3.9794301828  
 H,-4.7141934085,0.,-0.2063440108  
 H,0.,0.,5.927579303  
 H,5.1334136388,0.,-2.9637394148  
 H,-5.1334136388,0.,-2.9637394148  
 Au,1.6665568846,0.,0.9622098837  
 Au,0.,0.,-1.9243494063  
 Au,-1.6665568846,0.,0.9622098837  
 Br,7.613167262,0.,-4.3959369323  
 Br,-7.613167262,0.,-4.3959369323  
 Br,0.,0.,8.7912113296

**Table S2.** Molecular graph, electronic energy and geometry of the (Pz-Ag)<sub>3</sub>:X<sup>-n</sup> complexes.

|                                                                                    |                               |
|------------------------------------------------------------------------------------|-------------------------------|
| 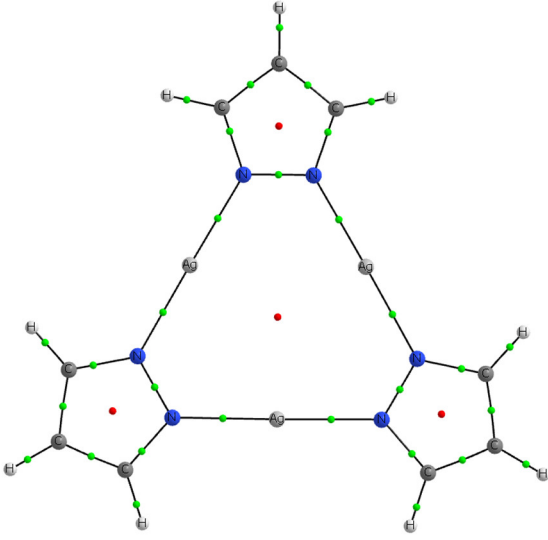 | MP2= -1114.42179833 NIMAG= 0  |
|                                                                                    | X                             |
|                                                                                    | X,1,r21                       |
|                                                                                    | X,1,r21,2,120.                |
|                                                                                    | X,1,r21,2,120.,3,180.,0       |
|                                                                                    | N,2,r52,1,90.,3,0.,0          |
|                                                                                    | N,2,r52,1,90.,4,0.,0          |
|                                                                                    | N,3,r52,1,90.,2,0.,0          |
|                                                                                    | N,3,r52,1,90.,4,0.,0          |
|                                                                                    | N,4,r52,1,90.,3,0.,0          |
|                                                                                    | N,4,r52,1,90.,2,0.,0          |
|                                                                                    | C,5,r115,2,a1152,1,180.,0     |
|                                                                                    | C,6,r115,2,a1152,1,180.,0     |
|                                                                                    | C,7,r115,3,a1152,1,180.,0     |
|                                                                                    | C,8,r115,3,a1152,1,180.,0     |
|                                                                                    | C,9,r115,4,a1152,1,180.,0     |
|                                                                                    | C,10,r115,4,a1152,1,180.,0    |
|                                                                                    | C,1,r171,3,120.,2,0.,0        |
|                                                                                    | C,1,r171,4,120.,3,0.,0        |
|                                                                                    | C,1,r171,2,120.,4,0.,0        |
|                                                                                    | H,11,r2011,5,a20115,2,180.,0  |
|                                                                                    | H,12,r2011,6,a20115,2,180.,0  |
|                                                                                    | H,13,r2011,7,a20115,3,180.,0  |
|                                                                                    | H,14,r2011,8,a20115,3,180.,0  |
|                                                                                    | H,15,r2011,9,a20115,4,180.,0  |
|                                                                                    | H,16,r2011,10,a20115,4,180.,0 |
|                                                                                    | H,1,r261,3,120.,2,0.,0        |
|                                                                                    | H,1,r261,4,120.,3,0.,0        |
|                                                                                    | H,1,r261,2,120.,4,0.,0        |
|                                                                                    | Ag,1,r291,3,60.,2,0.,0        |
|                                                                                    | Ag,1,r291,4,60.,3,0.,0        |
|                                                                                    | Ag,1,r291,2,60.,4,0.,0        |
|                                                                                    | r21=2.7498381                 |
|                                                                                    | r52=0.68417589                |
|                                                                                    | r115=1.36645246               |
|                                                                                    | r171=4.90601527               |
|                                                                                    | r2011=1.08948985              |
|                                                                                    | r261=5.99465491               |
|                                                                                    | r291=1.97902891               |
|                                                                                    | a1152=108.26155634            |
|                                                                                    | a20115=120.12601866           |

|                                                                                     |                                         |
|-------------------------------------------------------------------------------------|-----------------------------------------|
| 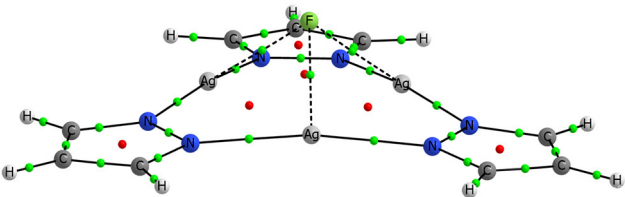 | MP2= -1214.16221409 NIMAG= 0            |
|                                                                                     | N,0.6845284454,2.8042020019,0.04217044  |
|                                                                                     | 18                                      |
|                                                                                     | N,-                                     |
|                                                                                     | 0.684526555,2.8042021985,0.0421715786   |
|                                                                                     | N,2.7707743953,-                        |
|                                                                                     | 0.8092817168,0.0421704776               |
|                                                                                     | N,2.0862473603,-                        |
|                                                                                     | 1.994918628,0.0421709719                |
|                                                                                     | N,-2.0862471865,-                       |
|                                                                                     | 1.9949205114,0.0421687052               |
|                                                                                     | N,-2.7707745391,-                       |
|                                                                                     | 0.8092833154,0.0421703206               |
|                                                                                     | C,1.1110672261,4.0981657838,0.137400929 |
|                                                                                     | 9                                       |
|                                                                                     | C,-                                     |
|                                                                                     | 1.1110666698,4.0981647808,0.137418986   |
|                                                                                     | C,4.1046491968,-                        |
|                                                                                     | 1.0868701725,0.1374066072               |
|                                                                                     | C,2.9935817886,-                        |
|                                                                                     | 3.0112944084,0.1374181977               |
|                                                                                     | C,-2.9935828094,-                       |
|                                                                                     | 3.011295924,0.1374074125                |
|                                                                                     | C,-4.1046495614,-                       |
|                                                                                     | 1.086870289,0.1374051493                |
|                                                                                     | C,0.0000001169,4.9617570267,0.197524789 |
|                                                                                     | 9                                       |
|                                                                                     | C,4.2970081392,-                        |
|                                                                                     | 2.4808783707,0.1975225257               |
|                                                                                     | C,-4.2970086809,-                       |
|                                                                                     | 2.4808786975,0.1975172272               |
|                                                                                     | H,2.1784734139,4.3185487358,0.15616053  |
|                                                                                     | 31                                      |
|                                                                                     | H,-                                     |
|                                                                                     | 2.1784728878,4.3185464551,0.156196709   |
|                                                                                     | H,4.8292091753,-                        |
|                                                                                     | 0.2726606238,0.156170899                |
|                                                                                     | H,2.6507349467,-                        |
|                                                                                     | 4.0458862111,0.1561942778               |
|                                                                                     | H,-2.6507367519,-                       |
|                                                                                     | 4.045888069,0.1561776038                |

|                                                                                     |                                                                                                                                                                                                                                                                                                                                                                                                                                                                                                                                                                                                                                                                                                                                                                                                                                                                                                                                                                         |
|-------------------------------------------------------------------------------------|-------------------------------------------------------------------------------------------------------------------------------------------------------------------------------------------------------------------------------------------------------------------------------------------------------------------------------------------------------------------------------------------------------------------------------------------------------------------------------------------------------------------------------------------------------------------------------------------------------------------------------------------------------------------------------------------------------------------------------------------------------------------------------------------------------------------------------------------------------------------------------------------------------------------------------------------------------------------------|
|                                                                                     | H,-4.8292089073,-<br>0.2726601621,0.1561734535<br>H,-0.00000013,6.0491520773,0.2722216543<br>H,5.2387199518,-<br>3.0245760572,0.272217255<br>H,-5.2387207482,-<br>3.0245759886,0.2722112075<br>Ag,1.6702750741,0.9643341767,-<br>0.1147617396<br>Ag,0.0000003317,-1.928665709,-<br>0.1147559912<br>Ag,-1.6702723759,0.9643322821,-<br>0.1147530868<br>F,-0.0000017587,-0.000000671,-<br>1.5068433766                                                                                                                                                                                                                                                                                                                                                                                                                                                                                                                                                                    |
| 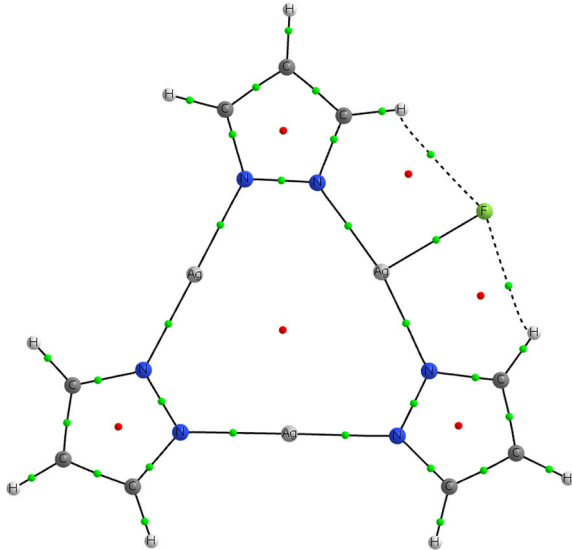 | MP2= -1214.14614086 NIMAG= 0<br>N,-0.6834987362,0.,-2.9761170683<br>N,0.6834987362,0.,-2.9761170683<br>N,-2.821161438,0.,0.5078527881<br>N,-2.0678216748,0.,1.6492588191<br>N,2.0678216748,0.,1.6492588191<br>N,2.821161438,0.,0.5078527881<br>C,-1.1115199447,0.,-4.2736926823<br>C,1.1115199447,0.,-4.2736926823<br>C,-4.1441178715,0.,0.8617716116<br>C,-2.9060491826,0.,2.7228451794<br>C,2.9060491826,0.,2.7228451794<br>C,4.1441178715,0.,0.8617716116<br>C,0.,0.,-5.135767117<br>C,-4.2407397777,0.,2.2665202801<br>C,4.2407397777,0.,2.2665202801<br>H,-2.178578322,0.,-4.4944663742<br>H,2.178578322,0.,-4.4944663742<br>H,-4.9188089716,0.,0.0942224103<br>H,-2.4553216712,0.,3.7178573913<br>H,2.4553216712,0.,3.7178573913<br>H,4.9188089716,0.,0.0942224103<br>H,0.,0.,-6.2249525323<br>H,-5.1509032781,0.,2.8659655643<br>H,5.1509032781,0.,2.8659655643<br>Ag,-1.7507342177,0.,-1.2233459218<br>Ag,0.,0.,1.829050381<br>Ag,1.7507342177,0.,-1.2233459218 |

|                                                                                    |                                   |
|------------------------------------------------------------------------------------|-----------------------------------|
|                                                                                    | F,0.,0.,4.0850777521              |
| 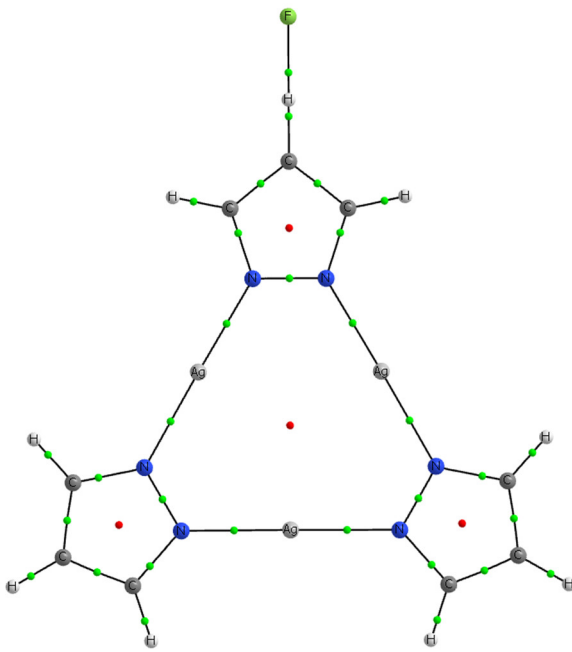 | MP2= -1214.11580417 NIMAG= 0      |
|                                                                                    | N,-0.6862934234,0.,-11.0536548133 |
|                                                                                    | N,0.6862934234,0.,-11.0536548133  |
|                                                                                    | N,-2.7227886354,0.,-7.5330468534  |
|                                                                                    | N,-2.0413937235,0.,-6.3472561119  |
|                                                                                    | N,2.0413937235,0.,-6.3472561119   |
|                                                                                    | N,2.7227886354,0.,-7.5330468534   |
|                                                                                    | C,-1.1004084604,0.,-12.3648142217 |
|                                                                                    | C,1.1004084604,0.,-12.3648142217  |
|                                                                                    | C,-4.0593208349,0.,-7.255584776   |
|                                                                                    | C,-2.950887713,0.,-5.3265221376   |
|                                                                                    | C,2.950887713,0.,-5.3265221376    |
|                                                                                    | C,4.0593208349,0.,-7.255584776    |
|                                                                                    | C,0.,0.,-13.2433493619            |
|                                                                                    | C,-4.2505103053,0.,-5.8617984367  |
|                                                                                    | C,4.2505103053,0.,-5.8617984367   |
|                                                                                    | H,-2.169220503,0.,-12.5841318783  |
|                                                                                    | H,2.169220503,0.,-12.5841318783   |
|                                                                                    | H,-4.7838428552,0.,-8.0693241122  |
|                                                                                    | H,-2.6108541603,0.,-4.2912872004  |
|                                                                                    | H,2.6108541603,0.,-4.2912872004   |
|                                                                                    | H,4.7838428552,0.,-8.0693241122   |
|                                                                                    | H,0.,0.,-14.394599871             |
|                                                                                    | H,-5.1945262767,0.,-5.3190206376  |
|                                                                                    | H,5.1945262767,0.,-5.3190206376   |
|                                                                                    | Ag,-1.7090763326,0.,-9.3135118754 |
|                                                                                    | Ag,0.,0.,-6.3559214431            |
|                                                                                    | Ag,1.7090763326,0.,-9.3135118754  |
|                                                                                    | F,0.,0.,-15.9481424453            |

|                                                                                     |                                          |
|-------------------------------------------------------------------------------------|------------------------------------------|
| 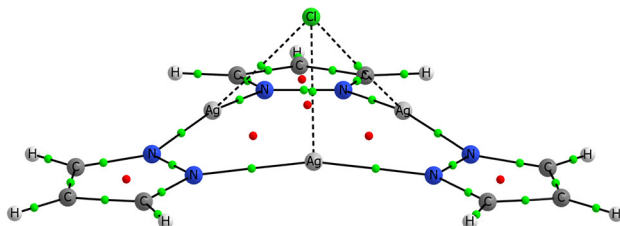 | MP2= -1574.19903106 NIMAG= 0             |
|                                                                                     | N,0.6839192464,2.8001336842,0.0240294765 |
|                                                                                     | N,-                                      |
|                                                                                     | 0.6839155829,2.8001290572,0.0240455591   |
|                                                                                     | N,2.7669445954,-                         |
|                                                                                     | 0.8077740859,0.0240258614                |
|                                                                                     | N,2.0830253936,-                         |
|                                                                                     | 1.9923527544,0.0240288953                |
|                                                                                     | N,-2.0830263646,-                        |
|                                                                                     | 1.9923553868,0.0240354405                |

|  |                                                                                                                                                                                                                                                                                                                                                                                                                                                                                                                                                                                                                                                                                                                                                                                                                                                                                                                                                                                                                                                                      |
|--|----------------------------------------------------------------------------------------------------------------------------------------------------------------------------------------------------------------------------------------------------------------------------------------------------------------------------------------------------------------------------------------------------------------------------------------------------------------------------------------------------------------------------------------------------------------------------------------------------------------------------------------------------------------------------------------------------------------------------------------------------------------------------------------------------------------------------------------------------------------------------------------------------------------------------------------------------------------------------------------------------------------------------------------------------------------------|
|  | N,-2.7669430716,-<br>0.8077767967,0.0240417649<br>C,1.1114686414,4.0885396839,0.173552390<br>4<br>C,-<br>1.1114679643,4.088544489,0.1734789895<br>C,4.0965181585,-<br>1.0817127979,0.173482467<br>C,2.9850439317,-<br>3.0068290795,0.1735142785<br>C,-2.9850443511,-<br>3.0068303836,0.1735323119<br>C,-4.0965174147,-<br>1.0817135881,0.1734950531<br>C,-<br>0.0000008222,4.9483007653,0.2695626533<br>C,4.2853527451,-<br>2.4741510912,0.2695501305<br>C,-4.2853540377,-<br>2.4741520727,0.2695570768<br>H,2.1788241702,4.3085496242,0.199686012<br>6<br>H,-<br>2.1788240978,4.308559391,0.1995435204<br>H,4.8207354565,-<br>0.2673638349,0.1995632093<br>H,2.6418994988,-<br>4.0411913281,0.1996256249<br>H,-2.6418998475,-<br>4.0411923126,0.1996488928<br>H,-4.8207336259,-<br>0.267363669,0.199576549<br>H,-<br>0.0000020685,6.0318760785,0.3868884585<br>H,5.223755621,-<br>3.0159401418,0.3868761316<br>H,-5.2237577836,-<br>3.0159405623,0.3868794658<br>Ag,1.6550622361,0.9555522823,-<br>0.1978392707<br>Ag,-0.0000010233,-1.9110913519,-<br>0.1978272832 |
|--|----------------------------------------------------------------------------------------------------------------------------------------------------------------------------------------------------------------------------------------------------------------------------------------------------------------------------------------------------------------------------------------------------------------------------------------------------------------------------------------------------------------------------------------------------------------------------------------------------------------------------------------------------------------------------------------------------------------------------------------------------------------------------------------------------------------------------------------------------------------------------------------------------------------------------------------------------------------------------------------------------------------------------------------------------------------------|



|                                                                                    |                                                                                                                                                                                                                                                                                                                                                                                                                                                                                                                                                                                                                                                                                                                                                                                                                                                                                                                                                                                                                                                                                               |
|------------------------------------------------------------------------------------|-----------------------------------------------------------------------------------------------------------------------------------------------------------------------------------------------------------------------------------------------------------------------------------------------------------------------------------------------------------------------------------------------------------------------------------------------------------------------------------------------------------------------------------------------------------------------------------------------------------------------------------------------------------------------------------------------------------------------------------------------------------------------------------------------------------------------------------------------------------------------------------------------------------------------------------------------------------------------------------------------------------------------------------------------------------------------------------------------|
|                                                                                    | <p>Ag,-1.6550545057,0.9555442535,-0.1978173302</p> <p>Cl,-0.0000071331,0.0000019217,-2.1860826093</p>                                                                                                                                                                                                                                                                                                                                                                                                                                                                                                                                                                                                                                                                                                                                                                                                                                                                                                                                                                                         |
| 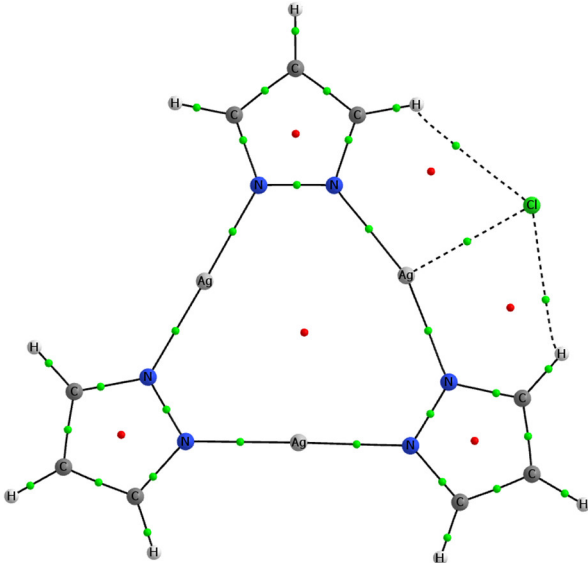 | <p>MP2= -1574.18904016 NIMAG= 0</p> <p>N,-0.6833251219,0,-2.9692456622</p> <p>N,0.6833251219,0,-2.9692456622</p> <p>N,-2.7638998472,0,0.5359922855</p> <p>N,-2.0872335055,0,1.7258839995</p> <p>N,2.0872335055,0,1.7258839995</p> <p>N,2.7638998472,0,0.5359922855</p> <p>C,-1.112178376,0,-4.2662456945</p> <p>C,1.112178376,0,-4.2662456945</p> <p>C,-4.1088191725,0,0.7959001435</p> <p>C,-3.0050224915,0,2.7344188175</p> <p>C,3.0050224915,0,2.7344188175</p> <p>C,4.1088191725,0,0.7959001435</p> <p>C,0,0,-5.1275182469</p> <p>C,-4.3044372289,0,2.1885259553</p> <p>C,4.3044372289,0,2.1885259553</p> <p>H,-2.1791341243,0,-4.4873262999</p> <p>H,2.1791341243,0,-4.4873262999</p> <p>H,-4.8267648508,0,-0.0250595036</p> <p>H,-2.6444070248,0,3.7643505735</p> <p>H,2.6444070248,0,3.7643505735</p> <p>H,4.8267648508,0,-0.0250595036</p> <p>H,0,0,-6.2166286351</p> <p>H,-5.2528205387,0,2.7250549727</p> <p>H,5.2528205387,0,2.7250549727</p> <p>Ag,-1.7113395525,0,-1.1978890657</p> <p>Ag,0,0,2.0318295468</p> <p>Ag,1.7113395525,0,-1.1978890657</p> <p>Cl,0,0,4.6543487698</p> |

|                                                                                    |                                                                                                                                                                                                                                                                                                                                                                                                                                                                                                                                                                                                                                                                                                                                                                                                                                                                                                                                                                                                                                                                                                                        |
|------------------------------------------------------------------------------------|------------------------------------------------------------------------------------------------------------------------------------------------------------------------------------------------------------------------------------------------------------------------------------------------------------------------------------------------------------------------------------------------------------------------------------------------------------------------------------------------------------------------------------------------------------------------------------------------------------------------------------------------------------------------------------------------------------------------------------------------------------------------------------------------------------------------------------------------------------------------------------------------------------------------------------------------------------------------------------------------------------------------------------------------------------------------------------------------------------------------|
| 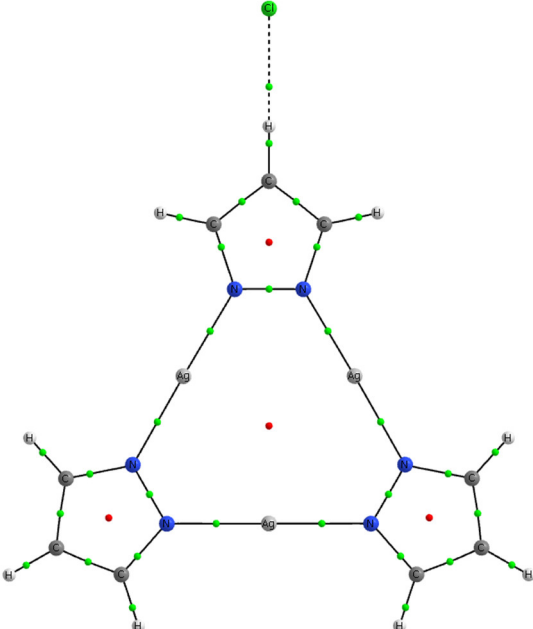 | <p>MP2= -1574.15919944 NIMAG= 0</p> <p>N,-0.6856840736,0,-11.0328638744</p> <p>N,0.6856840736,0,-11.0328638744</p> <p>N,-2.7225595204,0,-7.5087480286</p> <p>N,-2.0408672471,0,-6.3229482327</p> <p>N,2.0408672471,0,-6.3229482327</p> <p>N,2.7225595204,0,-7.5087480286</p> <p>C,-1.1064446174,0,-12.3381959093</p> <p>C,1.1064446174,0,-12.3381959093</p> <p>C,-4.0594712743,0,-7.2318026651</p> <p>C,-2.9508274138,0,-5.302840778</p> <p>C,2.9508274138,0,-5.302840778</p> <p>C,4.0594712743,0,-7.2318026651</p> <p>C,0,0,-13.2039544404</p> <p>C,-4.2502519215,0,-5.8383534486</p> <p>C,4.2502519215,0,-5.8383534486</p> <p>H,-2.1724918723,0,-12.5653311538</p> <p>H,2.1724918723,0,-12.5653311538</p> <p>H,-4.7841969491,0,-8.0453467611</p> <p>H,-2.6113232884,0,-4.2674717821</p> <p>H,2.6113232884,0,-4.2674717821</p> <p>H,4.7841969491,0,-8.0453467611</p> <p>H,0,0,-14.3051284283</p> <p>H,-5.1942445204,0,-5.2956972788</p> <p>H,5.1942445204,0,-5.2956972788</p> <p>Ag,-1.7113574517,0,-9.2879941689</p> <p>Ag,0,0,-6.3260491668</p> <p>Ag,1.7113574517,0,-9.2879941689</p> <p>Cl,0,0,-16.6715963889</p> |
|------------------------------------------------------------------------------------|------------------------------------------------------------------------------------------------------------------------------------------------------------------------------------------------------------------------------------------------------------------------------------------------------------------------------------------------------------------------------------------------------------------------------------------------------------------------------------------------------------------------------------------------------------------------------------------------------------------------------------------------------------------------------------------------------------------------------------------------------------------------------------------------------------------------------------------------------------------------------------------------------------------------------------------------------------------------------------------------------------------------------------------------------------------------------------------------------------------------|

|                                                                                     |                                                                                                                                                                                                                                                                                                                                                                                                                                                                                                                                                                                                                                                       |
|-------------------------------------------------------------------------------------|-------------------------------------------------------------------------------------------------------------------------------------------------------------------------------------------------------------------------------------------------------------------------------------------------------------------------------------------------------------------------------------------------------------------------------------------------------------------------------------------------------------------------------------------------------------------------------------------------------------------------------------------------------|
| 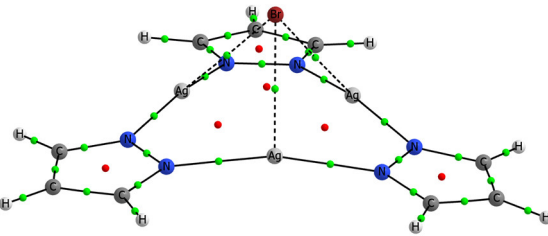 | <p>MP2= -1530.19018428 NIMAG= 0</p> <p>N,0.6838514134,-0.0746029469,2.7998313808</p> <p>N,-0.6838538219,-0.0746031547,2.799832474</p> <p>N,2.7666522175,-0.0746016052,-0.8076827988</p> <p>N,2.0827996199,-0.0745973849,-1.9921502441</p> <p>N,-2.0827993148,-0.0745970385,-1.9921487977</p> <p>N,-2.7666528484,-0.0746007975,-0.8076817176</p> <p>C,1.1115985496,0.0917318681,4.0861026149</p> <p>C,-1.1115983037,0.0917276911,4.0861050942</p> <p>C,4.0944672405,0.0917501615,-1.0803781579</p> <p>C,2.9828729653,0.0917201855,-3.0057256805</p> <p>C,-2.9828712746,0.0917271656,-3.0057244436</p> <p>C,-4.094468064,0.0917466948,-1.0803786672</p> |
|-------------------------------------------------------------------------------------|-------------------------------------------------------------------------------------------------------------------------------------------------------------------------------------------------------------------------------------------------------------------------------------------------------------------------------------------------------------------------------------------------------------------------------------------------------------------------------------------------------------------------------------------------------------------------------------------------------------------------------------------------------|

|                                                                                     |                                                                                                                                                                                                                                                                                                                                                                                                                                                                                                                                                                                                                                                                                                                                                                                                                                                                                                            |
|-------------------------------------------------------------------------------------|------------------------------------------------------------------------------------------------------------------------------------------------------------------------------------------------------------------------------------------------------------------------------------------------------------------------------------------------------------------------------------------------------------------------------------------------------------------------------------------------------------------------------------------------------------------------------------------------------------------------------------------------------------------------------------------------------------------------------------------------------------------------------------------------------------------------------------------------------------------------------------------------------------|
|                                                                                     | C,0.0000008919,0.1989460471,4.9444537249<br>C,4.2820231192,0.198951225,-2.47222652<br>C,-4.2820225653,0.1989507437,-2.4722269151<br>H,2.1789512697,0.1204163544,4.3059167202<br>H,-2.1789506144,0.1204079026,4.3059215127<br>H,4.8185069626,0.1204474483,-0.2659300283<br>H,2.6395643335,0.1203887801,-4.039988815<br>H,-2.6395612287,0.1204015176,-4.0399869204<br>H,-4.8185089623,0.1204396003,-0.2659314376<br>H,0.0000019028,0.3300717882,6.0264628105<br>H,5.2190706387,0.3300775574,-3.0132305794<br>H,-5.219069767,0.3300760113,-3.0132318126<br>Ag,1.6486505574,-0.3206982665,0.9518486223<br>Ag,0.0000001653,-0.3206936447,-1.9036994699<br>Ag,-1.6486539607,-0.3206968676,0.9518502211<br>Br,-0.0000011215,-2.4502870355,-0.0000021695                                                                                                                                                           |
| 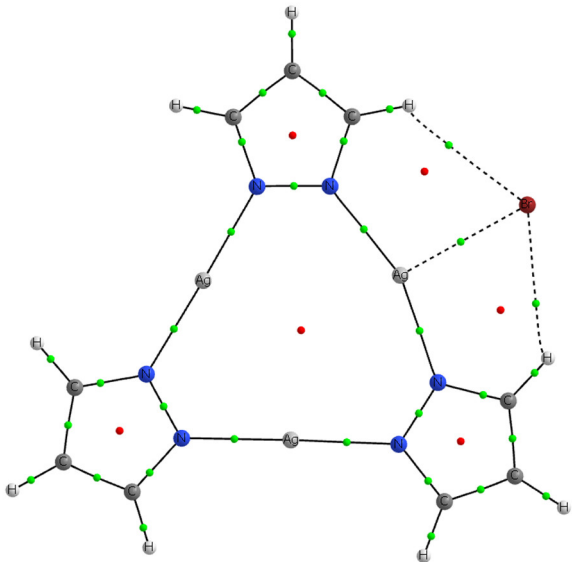 | MP2= -1530.17909977 NIMAG= 0<br>N,-0.6832654207,0,-2.972035821<br>N,0.6832654207,0,-2.972035821<br>N,-2.7479078067,0,0.5396675271<br>N,-2.0920254668,0,1.7414005827<br>N,2.0920254668,0,1.7414005827<br>N,2.7479078067,0,0.5396675271<br>C,-1.1123713467,0,-4.2688724104<br>C,1.1123713467,0,-4.2688724104<br>C,-4.0975947407,0,0.7745819789<br>C,-3.0300705368,0,2.7316974133<br>C,3.0300705368,0,2.7316974133<br>C,4.0975947407,0,0.7745819789<br>C,0,0,-5.1299365448<br>C,-4.3192635575,0,2.1628392081<br>C,4.3192635575,0,2.1628392081<br>H,-2.1792972672,0,-4.4900212035<br>H,2.1792972672,0,-4.4900212035<br>H,-4.7999855152,0,-0.0597674736<br>H,-2.6934849008,0,3.7693379561<br>H,2.6934849008,0,3.7693379561<br>H,4.7999855152,0,-0.0597674736<br>H,0,0,-6.2190360851<br>H,-5.2770275092,0,2.682338107<br>H,5.2770275092,0,2.682338107<br>Ag,-1.6990965176,0,-1.1947430262<br>Ag,0,0,2.0923742588 |

|                                                                                    |                                                                                                                                                                                                                                                                                                                                                                                                                                                                                                                                                                                                                                                                                                                                                                                                                                                                                                                                                                                               |
|------------------------------------------------------------------------------------|-----------------------------------------------------------------------------------------------------------------------------------------------------------------------------------------------------------------------------------------------------------------------------------------------------------------------------------------------------------------------------------------------------------------------------------------------------------------------------------------------------------------------------------------------------------------------------------------------------------------------------------------------------------------------------------------------------------------------------------------------------------------------------------------------------------------------------------------------------------------------------------------------------------------------------------------------------------------------------------------------|
|                                                                                    | Ag,1.6990965176,0,-1.1947430262<br>Br,0,0,4.8145051728                                                                                                                                                                                                                                                                                                                                                                                                                                                                                                                                                                                                                                                                                                                                                                                                                                                                                                                                        |
| 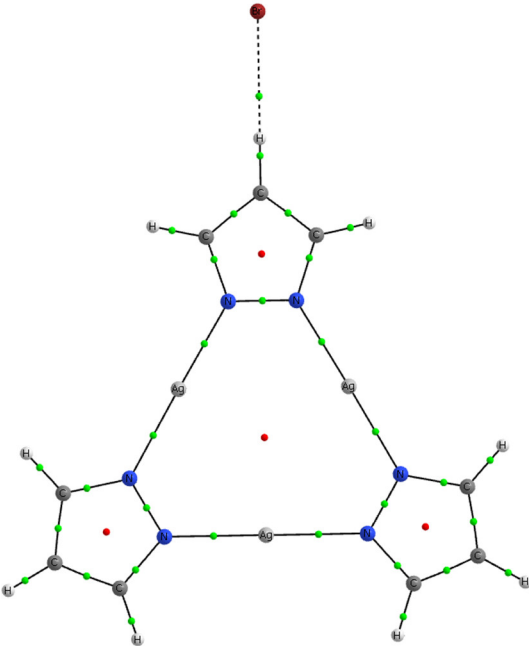 | MP2= -1530.14938477 NIMAG= 0<br>N,-0.6856232851,0,-11.0269202899<br>N,0.6856232851,0,-11.0269202899<br>N,-2.7225435465,0,-7.5023755717<br>N,-2.0408323992,0,-6.3165210514<br>N,2.0408323992,0,-6.3165210514<br>N,2.7225435465,0,-7.5023755717<br>C,-1.1071291941,0,-12.3314858688<br>C,1.1071291941,0,-12.3314858688<br>C,-4.0595196231,0,-7.2255166244<br>C,-2.9508719393,0,-5.2965539889<br>C,2.9508719393,0,-5.2965539889<br>C,4.0595196231,0,-7.2255166244<br>C,0,0,-13.1958470574<br>C,-4.2502648684,0,-5.8321289678<br>C,4.2502648684,0,-5.8321289678<br>H,-2.1729415999,0,-12.5592955383<br>H,2.1729415999,0,-12.5592955383<br>H,-4.7843038795,0,-8.0390117519<br>H,-2.6114527296,0,-4.2611650215<br>H,2.6114527296,0,-4.2611650215<br>H,4.7843038795,0,-8.0390117519<br>H,0,0,-14.2938450907<br>H,-5.1942538977,0,-5.2894915585<br>H,5.1942538977,0,-5.2894915585<br>Ag,-1.71166461,0,-9.2813016475<br>Ag,0,0,-6.3192655303<br>Ag,1.71166461,0,-9.2813016475<br>Br,0,0,-16.8494231353 |

|                                                                                     |                                                                                                                                                                                                                   |
|-------------------------------------------------------------------------------------|-------------------------------------------------------------------------------------------------------------------------------------------------------------------------------------------------------------------|
| 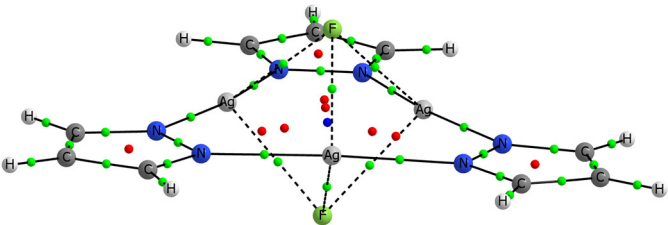 | MP2= -1313.77137985 NIMAG= 0<br>X<br>X,1,r21<br>X,1,r21,2,120.<br>X,1,r21,2,120.,3,180.,0<br>N,2,r52,1,90.,3,0.,0<br>N,2,r52,1,90.,4,0.,0<br>N,3,r52,1,90.,2,0.,0<br>N,3,r52,1,90.,4,0.,0<br>N,4,r52,1,90.,3,0.,0 |
|-------------------------------------------------------------------------------------|-------------------------------------------------------------------------------------------------------------------------------------------------------------------------------------------------------------------|

|  |                                                                                                                                                                                                                                                                                                                                                                                                                                                                                                                                                                                                                                                                                                                                                                                                                                                                                                          |
|--|----------------------------------------------------------------------------------------------------------------------------------------------------------------------------------------------------------------------------------------------------------------------------------------------------------------------------------------------------------------------------------------------------------------------------------------------------------------------------------------------------------------------------------------------------------------------------------------------------------------------------------------------------------------------------------------------------------------------------------------------------------------------------------------------------------------------------------------------------------------------------------------------------------|
|  | N,4,r52,1,90.,2,0.,0<br>C,5,r115,2,a1152,1,180.,0<br>C,6,r115,2,a1152,1,180.,0<br>C,7,r115,3,a1152,1,180.,0<br>C,8,r115,3,a1152,1,180.,0<br>C,9,r115,4,a1152,1,180.,0<br>C,10,r115,4,a1152,1,180.,0<br>C,1,r171,3,120.,2,0.,0<br>C,1,r171,4,120.,3,0.,0<br>C,1,r171,2,120.,4,0.,0<br>H,11,r2011,5,a20115,2,180.,0<br>H,12,r2011,6,a20115,2,180.,0<br>H,13,r2011,7,a20115,3,180.,0<br>H,14,r2011,8,a20115,3,180.,0<br>H,15,r2011,9,a20115,4,180.,0<br>H,16,r2011,10,a20115,4,180.,0<br>H,1,r261,3,120.,2,0.,0<br>H,1,r261,4,120.,3,0.,0<br>H,1,r261,2,120.,4,0.,0<br>Ag,1,r291,3,60.,2,0.,0<br>Ag,1,r291,4,60.,3,0.,0<br>Ag,1,r291,2,60.,4,0.,0<br>F,1,rcl,2,90.,3,90.,0<br>F,1,rcl,2,90.,3,-90.,0<br><br>r21=2.87160594<br>r52=0.68467026<br>r115=1.36549193<br>r171=5.04193545<br>r2011=1.09128504<br>r261=6.13395387<br>r291=1.85382051<br>a1152=108.16910165<br>a20115=119.80782174<br>rcl=1.58245635 |
|--|----------------------------------------------------------------------------------------------------------------------------------------------------------------------------------------------------------------------------------------------------------------------------------------------------------------------------------------------------------------------------------------------------------------------------------------------------------------------------------------------------------------------------------------------------------------------------------------------------------------------------------------------------------------------------------------------------------------------------------------------------------------------------------------------------------------------------------------------------------------------------------------------------------|

|                                                                                    |                                  |
|------------------------------------------------------------------------------------|----------------------------------|
| 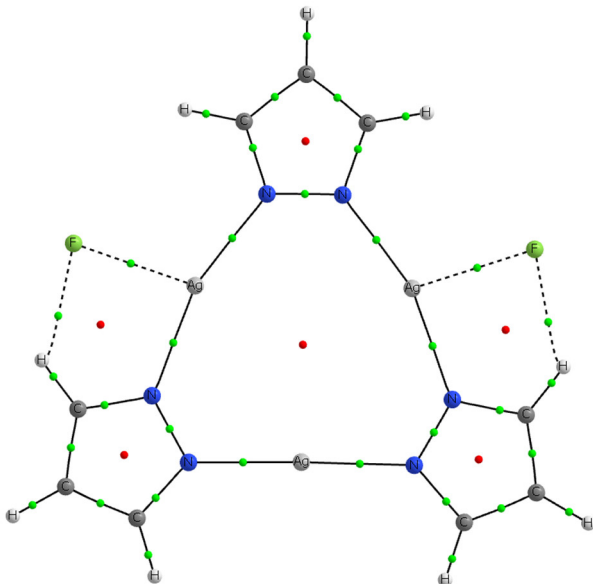 | MP2= -1313.78379123 NIMAG= 0     |
|                                                                                    | N,0.6340192821,0.,2.7693317219   |
|                                                                                    | N,-0.7337615116,0.,2.7813064002  |
|                                                                                    | N,2.7849830503,0.,-0.816363517   |
|                                                                                    | N,2.0994830696,0.,-2.0036843122  |
|                                                                                    | N,-2.0813019816,0.,-1.9337426657 |
|                                                                                    | N,-2.7755627541,0.,-0.7551970908 |
|                                                                                    | C,1.0799539837,0.,4.0569536436   |
|                                                                                    | C,-1.155372962,0.,4.0851811306   |
|                                                                                    | C,4.123013411,0.,-1.0936246373   |
|                                                                                    | C,3.0086134236,0.,-3.0238220354  |
|                                                                                    | C,-2.9734479254,0.,-2.9637444066 |
|                                                                                    | C,-4.1155571191,0.,-1.0420082294 |
|                                                                                    | C,-0.0285365756,0.,4.9322596728  |
|                                                                                    | C,4.3150572906,0.,-2.4912994883  |
|                                                                                    | C,-4.2857304625,0.,-2.4414164371 |
|                                                                                    | H,2.1655580465,0.,4.1976493486   |
|                                                                                    | H,-2.2219152569,0.,4.3163401187  |
|                                                                                    | H,4.8325014489,0.,-0.2642845155  |
|                                                                                    | H,2.6451278287,0.,-4.0529267608  |
|                                                                                    | H,-2.5524919488,0.,-3.974252956  |
|                                                                                    | H,-4.8490178227,0.,-0.2339350018 |
|                                                                                    | H,-0.0210822566,0.,6.0232208091  |
|                                                                                    | H,5.2600272911,0.,-3.0368781725  |
|                                                                                    | H,-5.2268033616,0.,-2.9933526347 |
|                                                                                    | Ag,1.9808205748,0.,1.1228144764  |
|                                                                                    | Ag,0.0180244271,0.,-2.2768481764 |
|                                                                                    | Ag,-1.7284735485,0.,0.9979346685 |
|                                                                                    | F,3.7186453294,0.,2.6696607397   |
|                                                                                    | F,-0.4526713554,0.,-4.5552716928 |

|                                                                                    |                                                                                                                                                                                                                                                                                                                                                                                                                                                                                                                                                                                                                                                                                                                                                                                                                                                                                                                                                                                                                                                           |
|------------------------------------------------------------------------------------|-----------------------------------------------------------------------------------------------------------------------------------------------------------------------------------------------------------------------------------------------------------------------------------------------------------------------------------------------------------------------------------------------------------------------------------------------------------------------------------------------------------------------------------------------------------------------------------------------------------------------------------------------------------------------------------------------------------------------------------------------------------------------------------------------------------------------------------------------------------------------------------------------------------------------------------------------------------------------------------------------------------------------------------------------------------|
| 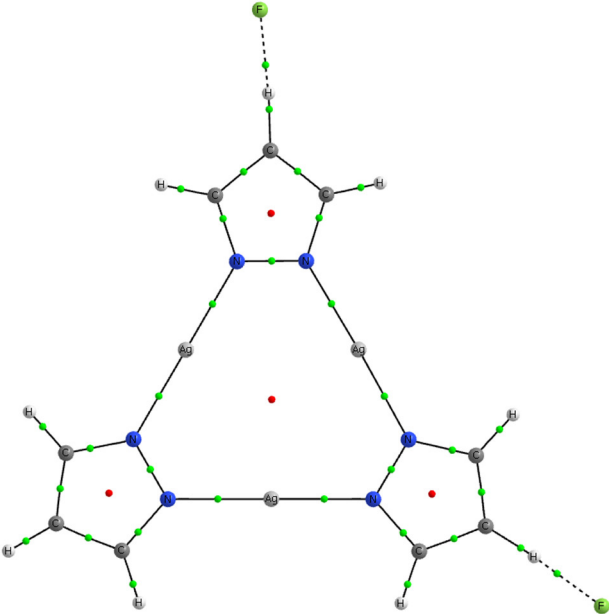 | MP2= -1313.76077782 NIMAG= 0<br>N,0.6834719946,0.,2.706992012<br>N,-0.6834719946,0.,2.706992012<br>N,2.7117133194,0.,-0.8226119284<br>N,2.0369437493,0.,-2.0167850507<br>N,-2.0369437493,0.,-2.0167850507<br>N,-2.7117133194,0.,-0.8226119284<br>C,1.1125748895,0.,4.0036159513<br>C,-1.1125748895,0.,4.0036159513<br>C,4.0581026893,0.,-1.0997043486<br>C,2.9770234624,0.,-3.0187282969<br>C,-2.9770234624,0.,-3.0187282969<br>C,-4.0581026893,0.,-1.0997043486<br>C,0.,0.,4.8652668149<br>C,4.2836377419,0.,-2.4888538381<br>C,-4.2836377419,0.,-2.4888538381<br>H,2.1798587122,0.,4.2235837635<br>H,-2.1798587122,0.,4.2235837635<br>H,4.7739184331,0.,-0.2763690913<br>H,2.6434227894,0.,-4.0573978808<br>H,-2.6434227894,0.,-4.0573978808<br>H,-4.7739184331,0.,-0.2763690913<br>H,0.,0.,5.9545732176<br>H,5.2843267048,0.,-3.0222652324<br>H,-5.2843267048,0.,-3.0222652324<br>Ag,1.7007952942,0.,0.9270998121<br>Ag,0.,0.,-2.0434036517<br>Ag,-1.7007952942,0.,0.9270998121<br>F,6.8010654903,0.,-3.6967940582<br>F,-6.8010654903,0.,-3.6967940582 |
|------------------------------------------------------------------------------------|-----------------------------------------------------------------------------------------------------------------------------------------------------------------------------------------------------------------------------------------------------------------------------------------------------------------------------------------------------------------------------------------------------------------------------------------------------------------------------------------------------------------------------------------------------------------------------------------------------------------------------------------------------------------------------------------------------------------------------------------------------------------------------------------------------------------------------------------------------------------------------------------------------------------------------------------------------------------------------------------------------------------------------------------------------------|

|                                                                                     |                                                                                                                                                                                                                                                                 |
|-------------------------------------------------------------------------------------|-----------------------------------------------------------------------------------------------------------------------------------------------------------------------------------------------------------------------------------------------------------------|
| 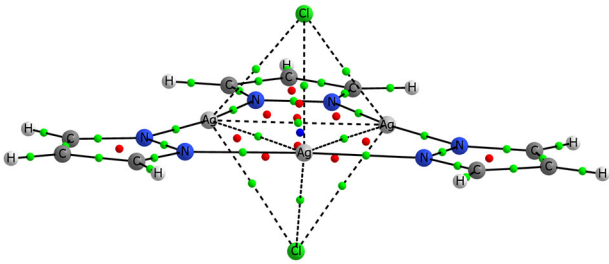 | tri_pz_ag_cl_2_mp2<br>MP2= -2033.85844322 NIMAG= 0<br>X<br>X,1,r21<br>X,1,r21,2,120.<br>X,1,r21,2,120.,3,180.,0<br>N,2,r52,1,90.,3,0.,0<br>N,2,r52,1,90.,4,0.,0<br>N,3,r52,1,90.,2,0.,0<br>N,3,r52,1,90.,4,0.,0<br>N,4,r52,1,90.,3,0.,0<br>N,4,r52,1,90.,2,0.,0 |
|-------------------------------------------------------------------------------------|-----------------------------------------------------------------------------------------------------------------------------------------------------------------------------------------------------------------------------------------------------------------|

|  |                               |
|--|-------------------------------|
|  | C,5,r115,2,a1152,1,180.,0     |
|  | C,6,r115,2,a1152,1,180.,0     |
|  | C,7,r115,3,a1152,1,180.,0     |
|  | C,8,r115,3,a1152,1,180.,0     |
|  | C,9,r115,4,a1152,1,180.,0     |
|  | C,10,r115,4,a1152,1,180.,0    |
|  | C,1,r171,3,120.,2,0.,0        |
|  | C,1,r171,4,120.,3,0.,0        |
|  | C,1,r171,2,120.,4,0.,0        |
|  | H,11,r2011,5,a20115,2,180.,0  |
|  | H,12,r2011,6,a20115,2,180.,0  |
|  | H,13,r2011,7,a20115,3,180.,0  |
|  | H,14,r2011,8,a20115,3,180.,0  |
|  | H,15,r2011,9,a20115,4,180.,0  |
|  | H,16,r2011,10,a20115,4,180.,0 |
|  | H,1,r261,3,120.,2,0.,0        |
|  | H,1,r261,4,120.,3,0.,0        |
|  | H,1,r261,2,120.,4,0.,0        |
|  | Ag,1,r291,3,60.,2,0.,0        |
|  | Ag,1,r291,4,60.,3,0.,0        |
|  | Ag,1,r291,2,60.,4,0.,0        |
|  | Cl,1,rcl,2,90.,3,90.,0        |
|  | Cl,1,rcl,2,90.,3,-90.,0       |
|  | r21=2.8695558                 |
|  | r52=0.68373106                |
|  | r115=1.36520889               |
|  | r171=5.03777307               |
|  | r2011=1.09116016              |
|  | r261=6.12948423               |
|  | r291=1.84527126               |
|  | a1152=108.23116793            |
|  | a20115=119.89868203           |
|  | rcl=2.16522942                |



|                                                                                     |                                                                                                                                                                                                                                                                                                                                                                                                                                                                                                                                                                                                                                                                                                                                                                                                                                                                                                                                                                                                                                                                                                                                                                                                                       |
|-------------------------------------------------------------------------------------|-----------------------------------------------------------------------------------------------------------------------------------------------------------------------------------------------------------------------------------------------------------------------------------------------------------------------------------------------------------------------------------------------------------------------------------------------------------------------------------------------------------------------------------------------------------------------------------------------------------------------------------------------------------------------------------------------------------------------------------------------------------------------------------------------------------------------------------------------------------------------------------------------------------------------------------------------------------------------------------------------------------------------------------------------------------------------------------------------------------------------------------------------------------------------------------------------------------------------|
| 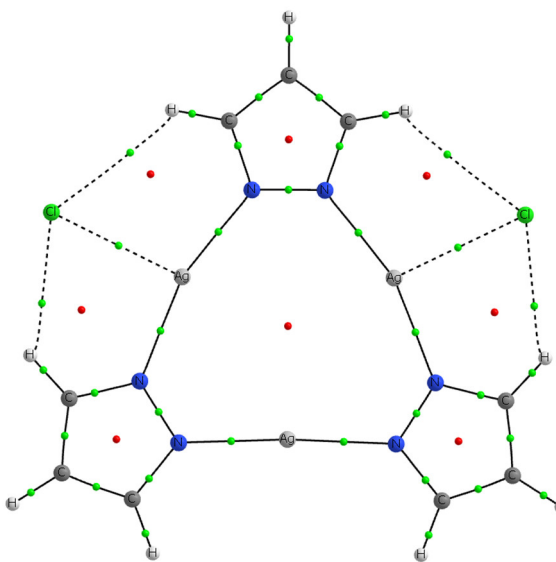  | <p>MP2= -2033.87713681 NIMAG= 0</p> <p>N,0.6692784101,0.,2.8148164179</p> <p>N,-0.6975983867,0.,2.7583331078</p> <p>N,2.7525543877,0.,-0.7973134508</p> <p>N,2.0667708971,0.,-1.9851252996</p> <p>N,-2.1030633199,0.,-1.9870203143</p> <p>N,-2.7375857368,0.,-0.7750286294</p> <p>C,1.0424933976,0.,4.1261904613</p> <p>C,-1.1870329475,0.,4.0374879226</p> <p>C,4.0914462872,0.,-1.0735738859</p> <p>C,2.9754654016,0.,-3.00650948</p> <p>C,-3.0521390615,0.,-2.9659209963</p> <p>C,-4.0900835822,0.,-0.9907432736</p> <p>C,-0.1080451725,0.,4.9423995865</p> <p>C,4.2793302699,0.,-2.4706724833</p> <p>C,-4.3342661838,0.,-2.3776299291</p> <p>H,2.1089799019,0.,4.3584665011</p> <p>H,-2.2640682671,0.,4.2113899085</p> <p>H,4.7986706896,0.,-0.2421162576</p> <p>H,2.6090141746,0.,-4.0347125927</p> <p>H,-2.7200527605,0.,-4.0056634216</p> <p>H,-4.7792047796,0.,-0.1449543191</p> <p>H,-0.1542858387,0.,6.0318495023</p> <p>H,5.2240225345,0.,-3.0160908165</p> <p>H,-5.3008778201,0.,-2.8823092954</p> <p>Ag,1.980615552,0.,1.1509989694</p> <p>Ag,-0.0064865712,0.,-2.2907628679</p> <p>Ag,-1.6527433727,0.,0.9542118311</p> <p>Cl,4.2480339112,0.,2.6778167723</p> <p>Cl,-0.1950403959,0.,-5.0178136694</p> |
|  | <p>MP2= -2033.85619152 NIMAG= 0</p> <p>N,0.6836020158,0.,2.6864675021</p> <p>N,-0.6836020158,0.,2.6864675021</p> <p>N,2.7130971773,0.,-0.8454242555</p> <p>N,2.0379369488,0.,-2.0384224112</p> <p>N,-2.0379369488,0.,-2.0384224112</p> <p>N,-2.7130971773,0.,-0.8454242555</p> <p>C,1.112651153,0.,3.9831782774</p> <p>C,-1.112651153,0.,3.9831782774</p> <p>C,4.0569240634,0.,-1.1156322219</p> <p>C,2.9696968284,0.,-3.0444022067</p> <p>C,-2.9696968284,0.,-3.0444022067</p> <p>C,-4.0569240634,0.,-1.1156322219</p>                                                                                                                                                                                                                                                                                                                                                                                                                                                                                                                                                                                                                                                                                               |

|  |                                  |
|--|----------------------------------|
|  | C,0,0,4.8439290569               |
|  | C,4.2684960599,0,-2.5039480128   |
|  | C,-4.2684960599,0,-2.5039480128  |
|  | H,2.1797366064,0,4.2037702504    |
|  | H,-2.1797366064,0,4.2037702504   |
|  | H,4.7818462464,0,-0.301991067    |
|  | H,2.6390712975,0,-4.0830915091   |
|  | H,-2.6390712975,0,-4.0830915091  |
|  | H,-4.7818462464,0,-0.301991067   |
|  | H,0,0,5.9330474203               |
|  | H,5.2415901892,0,-3.0110219699   |
|  | H,-5.2415901892,0,-3.0110219699  |
|  | Ag,1.7037047019,0,0.9114268027   |
|  | Ag,0,0,-2.0634322486             |
|  | Ag,-1.7037047019,0,0.9114268027  |
|  | Cl,7.7418793241,0,-3.4476812912  |
|  | Cl,-7.7418793241,0,-3.4476812912 |

|  |                                        |
|--|----------------------------------------|
|  | MP2= -1945.84431316 NIMAG= 0           |
|  | N,0.6836420484,0.0000855586,2.86950194 |
|  | 83                                     |
|  | N,-                                    |
|  | 0.6836387761,0.0000858494,2.869500323  |
|  | N,2.8268793284,0.0000837422,-          |
|  | 0.8427016069                           |
|  | N,2.1432406546,0.0000808228,-          |
|  | 2.0268030038                           |
|  | N,-2.143241689,0.0000802372,-          |
|  | 2.0268015385                           |
|  | N,-2.8268805375,0.0000857215,-         |
|  | 0.8427015024                           |
|  | C,1.1110670304,-                       |
|  | 0.0000194003,4.1659217533              |
|  | C,-1.1110658242,-                      |
|  | 0.0000165907,4.1659191363              |
|  | C,4.1633246362,-0.0000199535,-         |
|  | 1.1207476111                           |
|  | C,3.0522610253,-0.0000185799,-         |
|  | 3.0451732505                           |
|  | C,-3.0522612772,-0.0000144392,-        |
|  | 3.0451722173                           |
|  | C,-4.1633260245,-0.000023942,-         |
|  | 1.1207472898                           |

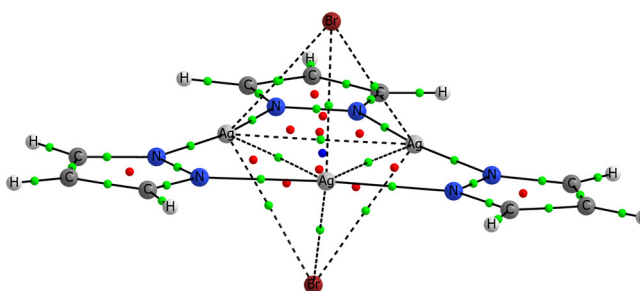

|  |                                                                                                                                                                                                                                                                                                                                                                                                                                                                                                                                                                                                                                                                                                                                                                                                                                                                   |
|--|-------------------------------------------------------------------------------------------------------------------------------------------------------------------------------------------------------------------------------------------------------------------------------------------------------------------------------------------------------------------------------------------------------------------------------------------------------------------------------------------------------------------------------------------------------------------------------------------------------------------------------------------------------------------------------------------------------------------------------------------------------------------------------------------------------------------------------------------------------------------|
|  | C,-0.0000003046,-<br>0.0000947432,5.0370626659<br>C,4.3622246972,-0.0000947999,-<br>2.5185303202<br>C,-4.3622253369,-0.0000950881,-<br>2.5185300577<br>H,2.1796010895,-<br>0.0000356994,4.3868121971<br>H,-2.1796002296,-<br>0.0000304713,4.3868076082<br>H,4.8888864843,-0.000034738,-<br>0.3058135058<br>H,2.709291218,-0.0000333034,-<br>4.080996256<br>H,-2.7092910098,-0.0000263941,-<br>4.0809950713<br>H,-4.8888882212,-0.0000417024,-<br>0.3058134537<br>H,-0.000001324,-<br>0.000186619,6.1287500875<br>H,5.307654564,-0.0001851804,-<br>3.0643725486<br>H,-5.307654891,-0.0001859255,-<br>3.0643727697<br>Ag,1.58403495,0.0001201194,0.914543981<br>Ag,-0.0000000795,0.000109519,-<br>1.8290868143<br>Ag,-<br>1.5840323789,0.000122607,0.914539883<br>Br,0.0000004143,-2.3134894321,-<br>0.0000025626<br>Br,-<br>0.0000002371,2.3137928249,0.0000017969 |
|--|-------------------------------------------------------------------------------------------------------------------------------------------------------------------------------------------------------------------------------------------------------------------------------------------------------------------------------------------------------------------------------------------------------------------------------------------------------------------------------------------------------------------------------------------------------------------------------------------------------------------------------------------------------------------------------------------------------------------------------------------------------------------------------------------------------------------------------------------------------------------|

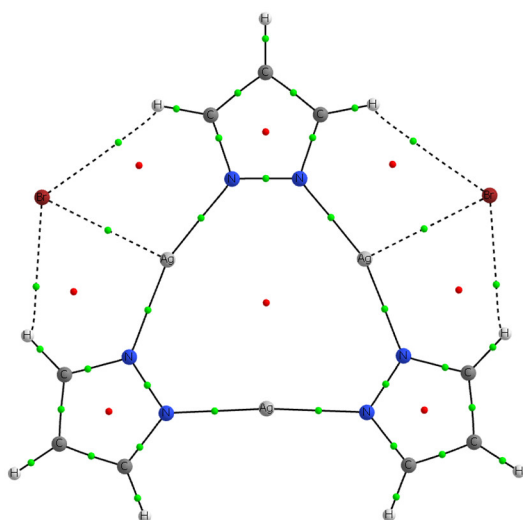

MP2= -1945.85929588 NIMAG= 0  
 N,0.6770060969,0.,2.8261660211  
 N,-0.6890223722,0.,2.7509393189  
 N,2.7500529682,0.,-0.7954035307  
 N,2.0638661479,0.,-1.9839139669  
 N,-2.1090285212,0.,-1.999387489  
 N,-2.7268945206,0.,-0.7787587814  
 C,1.0301882945,0.,4.1433774874  
 C,-1.1969830942,0.,4.0226829313  
 C,4.0891032452,0.,-1.0728660453  
 C,2.9736808727,0.,-3.0048342664  
 C,-3.0731760144,0.,-2.9638579774  
 C,-4.082237157,0.,-0.9747236982  
 C,-0.1315191742,0.,4.9428907954  
 C,4.2768110622,0.,-2.469218018  
 C,-4.3464285841,0.,-2.3575464518  
 H,2.0913615726,0.,4.3966365256  
 H,-2.2764225464,0.,4.1807053333  
 H,4.7985993818,0.,-0.243754698  
 H,2.6103974517,0.,-4.0338316182  
 H,-2.7619181361,0.,-4.0094905132  
 H,-4.7588082976,0.,-0.1189129118  
 H,-0.1926751989,0.,6.0314838369  
 H,5.2213702236,0.,-3.0145595041  
 H,-5.3197558247,0.,-2.8488803016  
 Ag,1.9929156,0.,1.1618628371  
 Ag,-0.0097449327,0.,-2.3068469558  
 Ag,-1.6338418257,0.,0.9432990179  
 Br,4.3727292982,0.,2.7272745535  
 Br,-0.1755243973,0.,-5.1505319329

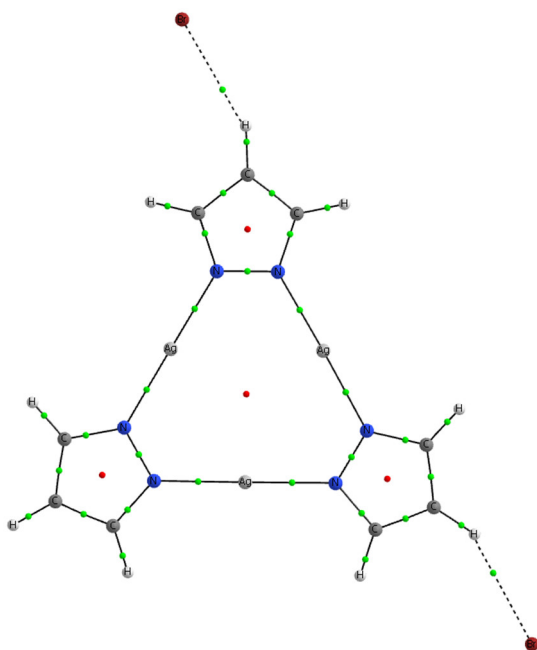

MP2= -1945.83825799 NIMAG= 0  
 N,0.6837306603,0.,2.6504223059  
 N,-0.6837306603,0.,2.6504223059  
 N,2.7169420021,0.,-0.8804843246  
 N,2.0372711729,0.,-2.071068092  
 N,-2.0372711729,0.,-2.071068092  
 N,-2.7169420021,0.,-0.8804843246  
 C,1.1126809577,0.,3.9471536898  
 C,-1.1126809577,0.,3.9471536898  
 C,4.0593644215,0.,-1.1535418219  
 C,2.9643604894,0.,-3.0809387432  
 C,-2.9643604894,0.,-3.0809387432  
 C,-4.0593644215,0.,-1.1535418219  
 C,0.,0.,4.8077176394  
 C,4.2633378613,0.,-2.5424596029  
 C,-4.2633378613,0.,-2.5424596029  
 H,2.1797534587,0.,4.1678867218  
 H,-2.1797534587,0.,4.1678867218  
 H,4.7919299349,0.,-0.3469880165  
 H,2.629407205,0.,-4.1182201216  
 H,-2.629407205,0.,-4.1182201216  
 H,-4.7919299349,0.,-0.3469880165  
 H,0.,0.,5.8967947659  
 H,5.2356565499,0.,-3.0433772421  
 H,-5.2356565499,0.,-3.0433772421  
 Ag,1.7076887209,0.,0.8780474971  
 Ag,0.,0.,-2.092108668  
 Ag,-1.7076887209,0.,0.8780474971  
 Br,8.0097158274,0.,-2.962634118  
 Br,-8.0097158274,0.,-2.962634118

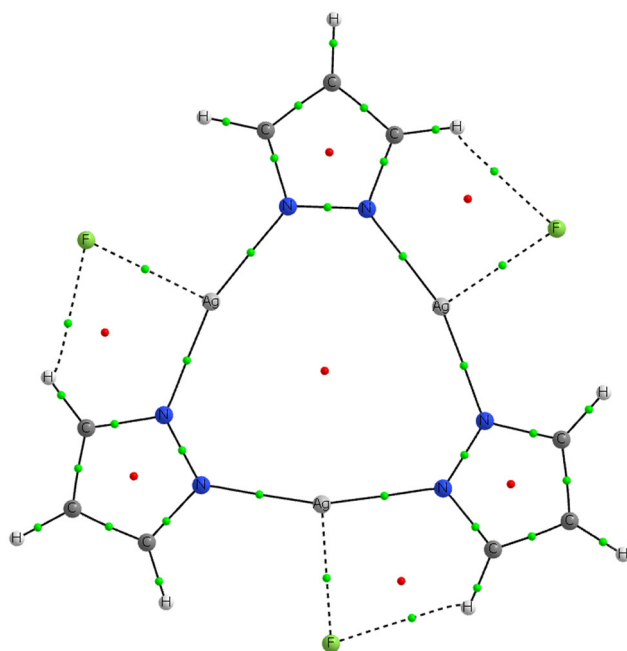

MP2= -1413.33410188 NIMAG= 0  
 N,2.0770234505,2.0065051895,0.  
 N,2.7877750217,0.8339166705,0.  
 N,-2.1161906449,1.9970951658,0.  
 N,-2.7766291359,0.7955427971,0.  
 N,-0.6717914492,-2.8312640559,0.  
 N,0.6990362856,-2.802046163,0.  
 C,2.9567938161,3.0509702582,0.  
 C,4.1193772809,1.1409895713,0.  
 C,-3.0475670163,2.997120365,0.  
 C,-4.1210150428,1.035593887,0.  
 C,-1.0716693873,-4.1380015281,0.  
 C,1.1637496209,-4.0861920796,0.  
 C,4.2774018335,2.5458760107,0.  
 C,-4.3434058262,2.4318904064,0.  
 C,0.0659988538,-4.9772860986,0.  
 H,2.5400814212,4.0618687343,0.  
 H,4.8424027577,0.3223866829,0.  
 H,-2.6997122779,4.0324017526,0.  
 H,-4.7881785659,0.1693542652,0.  
 H,-2.1420618506,-4.3550362123,0.  
 H,2.2475968949,-4.2304810244,0.  
 H,5.2114791522,3.1129020416,0.  
 H,-5.301392823,2.9576608309,0.  
 H,0.0897529614,-6.0697788229,0.  
 Ag,-0.0230337063,2.3036672882,0.  
 Ag,-1.9844364922,-1.172171348,0.  
 Ag,2.0068671051,-1.1321019238,0.  
 F,0.1654123113,4.7070373474,0.  
 F,-4.1612152342,-2.2089746233,0.  
 F,3.9925506858,-2.4994433848,0.

|                                                                                    |                                                                                                                                                                                                                                                                                                                                                                                                                                                                                                                                                                                                                                                                                                                                                                                                                                                                                                                                                                                                                                                                                                                                                                                                                                                                     |
|------------------------------------------------------------------------------------|---------------------------------------------------------------------------------------------------------------------------------------------------------------------------------------------------------------------------------------------------------------------------------------------------------------------------------------------------------------------------------------------------------------------------------------------------------------------------------------------------------------------------------------------------------------------------------------------------------------------------------------------------------------------------------------------------------------------------------------------------------------------------------------------------------------------------------------------------------------------------------------------------------------------------------------------------------------------------------------------------------------------------------------------------------------------------------------------------------------------------------------------------------------------------------------------------------------------------------------------------------------------|
| 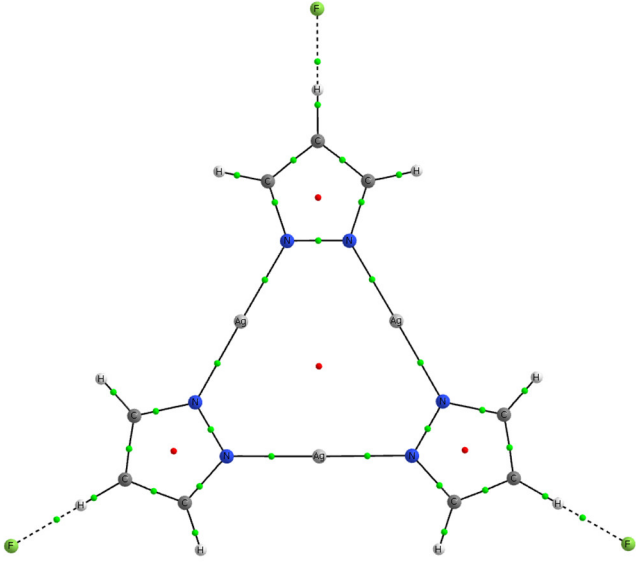 | <p>MP2= -1413.35860701 NIMAG= 0</p> <p>X</p> <p>X,1,r21</p> <p>X,1,r21,2,120.</p> <p>X,1,r21,2,120.,3,180.,0</p> <p>N,2,r52,1,90.,3,0.,0</p> <p>N,2,r52,1,90.,4,0.,0</p> <p>N,3,r52,1,90.,2,0.,0</p> <p>N,3,r52,1,90.,4,0.,0</p> <p>N,4,r52,1,90.,3,0.,0</p> <p>N,4,r52,1,90.,2,0.,0</p> <p>C,5,r115,2,a1152,1,180.,0</p> <p>C,6,r115,2,a1152,1,180.,0</p> <p>C,7,r115,3,a1152,1,180.,0</p> <p>C,8,r115,3,a1152,1,180.,0</p> <p>C,9,r115,4,a1152,1,180.,0</p> <p>C,10,r115,4,a1152,1,180.,0</p> <p>C,1,r171,3,120.,2,0.,0</p> <p>C,1,r171,4,120.,3,0.,0</p> <p>C,1,r171,2,120.,4,0.,0</p> <p>H,11,r2011,5,a20115,2,180.,0</p> <p>H,12,r2011,6,a20115,2,180.,0</p> <p>H,13,r2011,7,a20115,3,180.,0</p> <p>H,14,r2011,8,a20115,3,180.,0</p> <p>H,15,r2011,9,a20115,4,180.,0</p> <p>H,16,r2011,10,a20115,4,180.,0</p> <p>H,1,r261,3,120.,2,0.,0</p> <p>H,1,r261,4,120.,3,0.,0</p> <p>H,1,r261,2,120.,4,0.,0</p> <p>Ag,1,r291,3,60.,2,0.,0</p> <p>Ag,1,r291,4,60.,3,0.,0</p> <p>Ag,1,r291,2,60.,4,0.,0</p> <p>F,1,rf,29,60.,2,180.,0</p> <p>F,1,rf,30,60.,3,180.,0</p> <p>F,1,rf,31,60.,4,180.,0</p><br><p>r21=2.74942384</p> <p>r52=0.68545748</p> <p>r115=1.37361623</p> <p>r171=4.93672313</p> <p>r2011=1.09087501</p> <p>r261=6.05920163</p> <p>r291=1.97479365</p> |
|------------------------------------------------------------------------------------|---------------------------------------------------------------------------------------------------------------------------------------------------------------------------------------------------------------------------------------------------------------------------------------------------------------------------------------------------------------------------------------------------------------------------------------------------------------------------------------------------------------------------------------------------------------------------------------------------------------------------------------------------------------------------------------------------------------------------------------------------------------------------------------------------------------------------------------------------------------------------------------------------------------------------------------------------------------------------------------------------------------------------------------------------------------------------------------------------------------------------------------------------------------------------------------------------------------------------------------------------------------------|

|  |                                                            |
|--|------------------------------------------------------------|
|  | a1152=107.65730918<br>a20115=119.23117844<br>rf=7.83637357 |
|--|------------------------------------------------------------|

|                                                                                    |                                                                                                                                                                                                                                                                                                                                                                                                                                                                                                                                                                                                                                                                                                                                                                                                                                                                                                                                                                                        |
|------------------------------------------------------------------------------------|----------------------------------------------------------------------------------------------------------------------------------------------------------------------------------------------------------------------------------------------------------------------------------------------------------------------------------------------------------------------------------------------------------------------------------------------------------------------------------------------------------------------------------------------------------------------------------------------------------------------------------------------------------------------------------------------------------------------------------------------------------------------------------------------------------------------------------------------------------------------------------------------------------------------------------------------------------------------------------------|
| 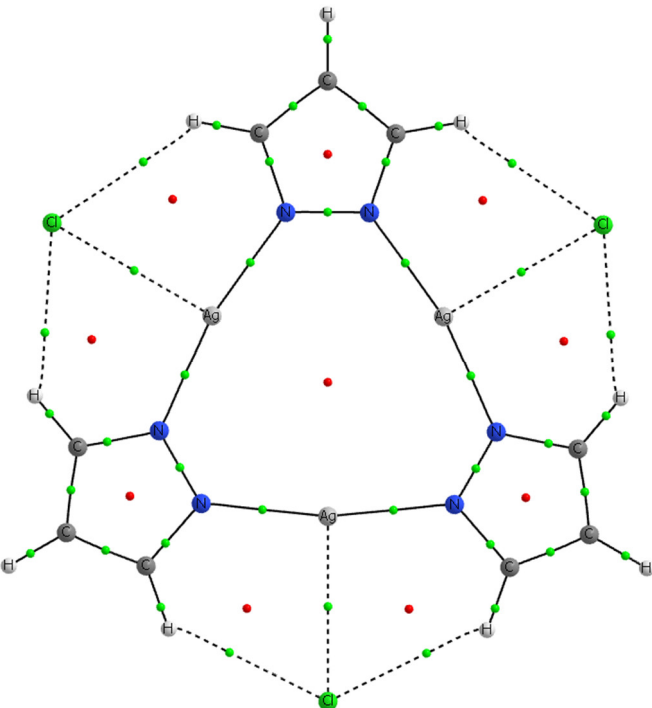 | MP2= -2493.49098353 NIMAG=<br>0<br>X<br>X,1,r21<br>X,1,r21,2,120.<br>X,1,r21,2,120.,3,180.,0<br>N,2,r52,1,90.,3,0.,0<br>N,2,r52,1,90.,4,0.,0<br>N,3,r52,1,90.,2,0.,0<br>N,3,r52,1,90.,4,0.,0<br>N,4,r52,1,90.,3,0.,0<br>N,4,r52,1,90.,2,0.,0<br>C,5,r115,2,a1152,1,180.,0<br>C,6,r115,2,a1152,1,180.,0<br>C,7,r115,3,a1152,1,180.,0<br>C,8,r115,3,a1152,1,180.,0<br>C,9,r115,4,a1152,1,180.,0<br>C,10,r115,4,a1152,1,180.,0<br>C,1,r171,3,120.,2,0.,0<br>C,1,r171,4,120.,3,0.,0<br>C,1,r171,2,120.,4,0.,0<br>H,11,r2011,5,a20115,2,180.,0<br>H,12,r2011,6,a20115,2,180.,0<br>H,13,r2011,7,a20115,3,180.,0<br>H,14,r2011,8,a20115,3,180.,0<br>H,15,r2011,9,a20115,4,180.,0<br>H,16,r2011,10,a20115,4,180.,0<br>H,1,r261,3,120.,2,0.,0<br>H,1,r261,4,120.,3,0.,0<br>H,1,r261,2,120.,4,0.,0<br>Ag,1,r291,3,60.,2,0.,0<br>Ag,1,r291,4,60.,3,0.,0<br>Ag,1,r291,2,60.,4,0.,0<br>Cl,1,rf,3,60.,2,0.,0<br>Cl,1,rf,4,60.,3,0.,0<br>Cl,1,rf,2,60.,4,0.,0<br><br>r21=2.79397013<br>r52=0.68571669 |
|------------------------------------------------------------------------------------|----------------------------------------------------------------------------------------------------------------------------------------------------------------------------------------------------------------------------------------------------------------------------------------------------------------------------------------------------------------------------------------------------------------------------------------------------------------------------------------------------------------------------------------------------------------------------------------------------------------------------------------------------------------------------------------------------------------------------------------------------------------------------------------------------------------------------------------------------------------------------------------------------------------------------------------------------------------------------------------|



|                                                                                    |                                                                                                                                                                                                                                                                                                                                                                                                                                                                                                                                                                                                                                                                                                                                                                                                                                                                                                                                          |
|------------------------------------------------------------------------------------|------------------------------------------------------------------------------------------------------------------------------------------------------------------------------------------------------------------------------------------------------------------------------------------------------------------------------------------------------------------------------------------------------------------------------------------------------------------------------------------------------------------------------------------------------------------------------------------------------------------------------------------------------------------------------------------------------------------------------------------------------------------------------------------------------------------------------------------------------------------------------------------------------------------------------------------|
|                                                                                    | r115=1.36612675<br>r171=4.95001333<br>r2011=1.09202493<br>r261=6.04151947<br>r291=2.19264029<br>a1152=108.47621532<br>a20115=118.51123295<br>rf=5.21805156                                                                                                                                                                                                                                                                                                                                                                                                                                                                                                                                                                                                                                                                                                                                                                               |
| 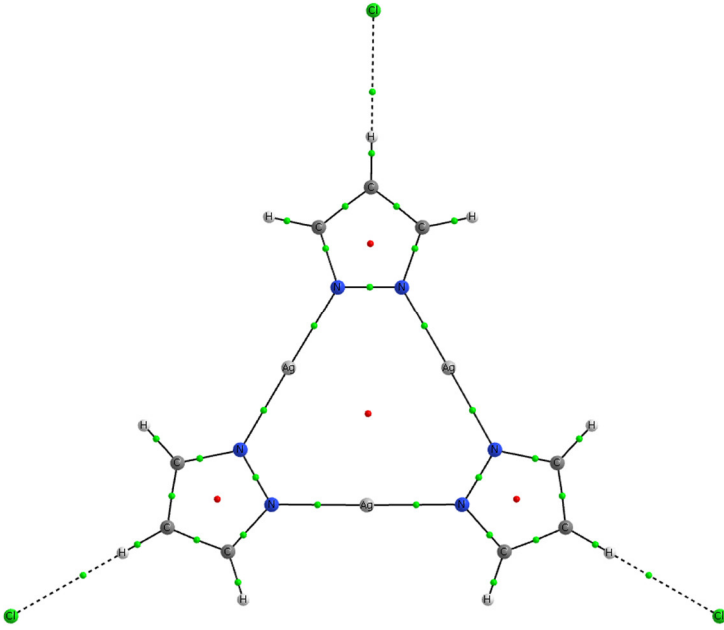 | MP2= -2493.51272106 NIMAG=0<br>N,0.6851598509,0.,2.7501859923<br>N,-0.6851598509,0.,2.7501859923<br>N,2.7243117377,0.,-0.781722259<br>N,2.0391442088,0.,-1.968445031<br>N,-2.0391442088,0.,-1.968445031<br>N,-2.7243117377,0.,-0.781722259<br>C,1.1072561745,0.,4.0540494066<br>C,-1.1072561745,0.,4.0540494066<br>C,4.0645351664,0.,-1.0681191336<br>C,2.9572600363,0.,-2.9859358616<br>C,-2.9572600363,0.,-2.9859358616<br>C,-4.0645351664,0.,-1.0681191336<br>C,0.,0.,4.9215300289<br>C,4.2621530781,0.,-2.460775003<br>C,-4.2621530781,0.,-2.460775003<br>H,2.1738111543,0.,4.2785608512<br>H,-2.1738111543,0.,4.2785608512<br>H,4.7922521737,0.,-0.2567172315<br>H,2.6184028184,0.,-4.0218514866<br>H,-2.6184028184,0.,-4.0218514866<br>H,-4.7922521737,0.,-0.2567172315<br>H,0.,0.,6.0179285632<br>H,5.2116562812,0.,-3.0089840097<br>H,-5.2116562812,0.,-3.0089840097<br>Ag,1.7123650959,0.,0.9886341926<br>Ag,0.,0.,-1.977205477 |

|  |                                                                                                                                      |
|--|--------------------------------------------------------------------------------------------------------------------------------------|
|  | Ag,-<br>1.7123650959,0.,0.9886341926<br>Cl,7.584478187,0.,-4.3789157976<br>Cl,-7.584478187,0.,-4.3789157976<br>Cl,0.,0.,8.7578186132 |
|--|--------------------------------------------------------------------------------------------------------------------------------------|

|                                                                                    |                                                                                                                                                                                                                                                                                                                                                                                                                                                                                                                                                                                                                                                                                                                                                                                                                                                                                                                                                                   |
|------------------------------------------------------------------------------------|-------------------------------------------------------------------------------------------------------------------------------------------------------------------------------------------------------------------------------------------------------------------------------------------------------------------------------------------------------------------------------------------------------------------------------------------------------------------------------------------------------------------------------------------------------------------------------------------------------------------------------------------------------------------------------------------------------------------------------------------------------------------------------------------------------------------------------------------------------------------------------------------------------------------------------------------------------------------|
| 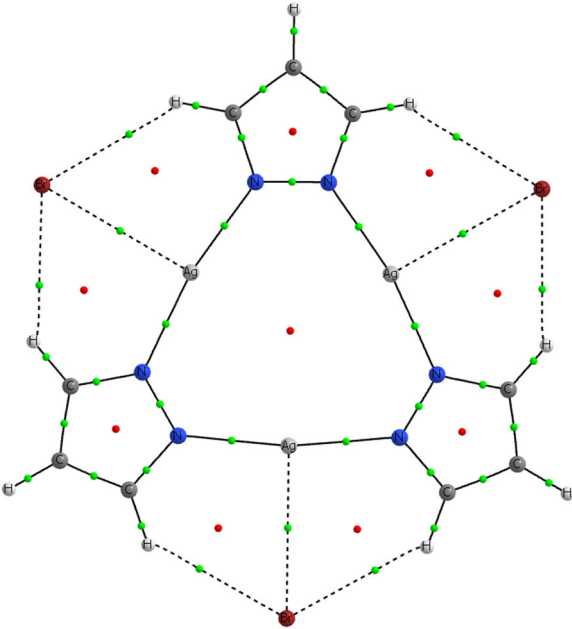 | MP2= -2361.46823649 NIMAG= 0<br>X<br>X,1,r21<br>X,1,r21,2,120.<br>X,1,r21,2,120.,3,180.,0<br>N,2,r52,1,90.,3,0.,0<br>N,2,r52,1,90.,4,0.,0<br>N,3,r52,1,90.,2,0.,0<br>N,3,r52,1,90.,4,0.,0<br>N,4,r52,1,90.,3,0.,0<br>N,4,r52,1,90.,2,0.,0<br>C,5,r115,2,a1152,1,180.,0<br>C,6,r115,2,a1152,1,180.,0<br>C,7,r115,3,a1152,1,180.,0<br>C,8,r115,3,a1152,1,180.,0<br>C,9,r115,4,a1152,1,180.,0<br>C,10,r115,4,a1152,1,180.,0<br>C,1,r171,3,120.,2,0.,0<br>C,1,r171,4,120.,3,0.,0<br>C,1,r171,2,120.,4,0.,0<br>H,11,r2011,5,a20115,2,180.,0<br>H,12,r2011,6,a20115,2,180.,0<br>H,13,r2011,7,a20115,3,180.,0<br>H,14,r2011,8,a20115,3,180.,0<br>H,15,r2011,9,a20115,4,180.,0<br>H,16,r2011,10,a20115,4,180.,0<br>H,1,r261,3,120.,2,0.,0<br>H,1,r261,4,120.,3,0.,0<br>H,1,r261,2,120.,4,0.,0<br>Ag,1,r291,3,60.,2,0.,0<br>Ag,1,r291,4,60.,3,0.,0<br>Ag,1,r291,2,60.,4,0.,0<br>Br,1,rf,3,60.,2,0.,0<br>Br,1,rf,4,60.,3,0.,0<br>Br,1,rf,2,60.,4,0.,0<br><br>r21=2.78777393 |
|------------------------------------------------------------------------------------|-------------------------------------------------------------------------------------------------------------------------------------------------------------------------------------------------------------------------------------------------------------------------------------------------------------------------------------------------------------------------------------------------------------------------------------------------------------------------------------------------------------------------------------------------------------------------------------------------------------------------------------------------------------------------------------------------------------------------------------------------------------------------------------------------------------------------------------------------------------------------------------------------------------------------------------------------------------------|

|                                                                                    |                                                                                                                                                                                                                                                                                                                                                                                                                                                                                                                                                                                                                                                                                                                                                                                                                                                                                                                                                                                                                                                                                |
|------------------------------------------------------------------------------------|--------------------------------------------------------------------------------------------------------------------------------------------------------------------------------------------------------------------------------------------------------------------------------------------------------------------------------------------------------------------------------------------------------------------------------------------------------------------------------------------------------------------------------------------------------------------------------------------------------------------------------------------------------------------------------------------------------------------------------------------------------------------------------------------------------------------------------------------------------------------------------------------------------------------------------------------------------------------------------------------------------------------------------------------------------------------------------|
|                                                                                    | r52=0.68572162<br>r115=1.36626381<br>r171=4.94273653<br>r2011=1.09169169<br>r261=6.03388486<br>r291=2.16154697<br>a1152=108.47041342<br>a20115=118.71279244<br>rf=5.3999374                                                                                                                                                                                                                                                                                                                                                                                                                                                                                                                                                                                                                                                                                                                                                                                                                                                                                                    |
| 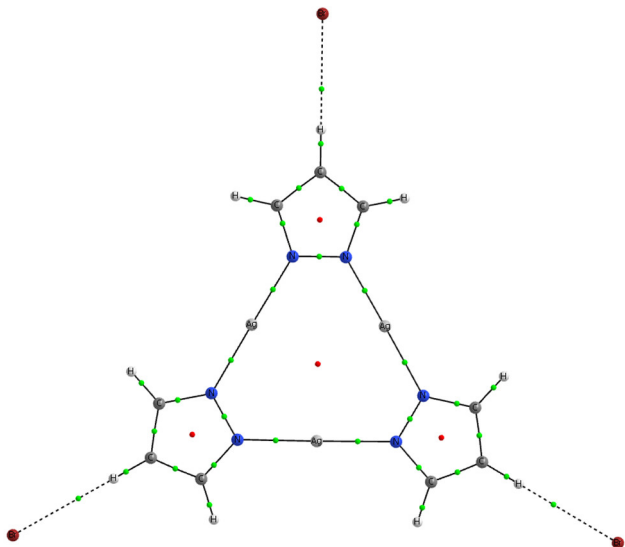 | MP2= -2361.48741177 NIMAG= 0<br>N,0.6850495639,0.,2.7503041832<br>N,-0.6850495639,0.,2.7503041832<br>N,2.7243518812,0.,-0.7818772151<br>N,2.0393017978,0.,-1.9684153026<br>N,-2.0393017978,0.,-1.9684153026<br>N,-2.7243518812,0.,-0.7818772151<br>C,1.1079138977,0.,4.0534702125<br>C,-1.1079138977,0.,4.0534702125<br>C,4.0643589206,0.,-1.0672503843<br>C,2.9564411232,0.,-2.9862122949<br>C,-2.9564411232,0.,-2.9862122949<br>C,-4.0643589206,0.,-1.0672503843<br>C,0.,0.,4.9196369031<br>C,4.26052172,0.,-2.459816028<br>C,-4.26052172,0.,-2.459816028<br>H,2.1742791756,0.,4.2784256277<br>H,-2.1742791756,0.,4.2784256277<br>H,4.7923598312,0.,-0.2562296466<br>H,2.6180733793,0.,-4.0221887626<br>H,-2.6180733793,0.,-4.0221887626<br>H,-4.7923598312,0.,-0.2562296466<br>H,0.,0.,6.0143474095<br>H,5.2085675349,0.,-3.0071732989<br>H,-5.2085675349,0.,-3.0071732989<br>Ag,1.7127257571,0.,0.9888475796<br>Ag,0.,0.,-1.9776712736<br>Ag,-1.7127257571,0.,0.9888475796<br>Br,7.779709616,0.,-4.4916761175<br>Br,-7.779709616,0.,-4.4916761175<br>Br,0.,0.,8.9832708121 |

**Table S3.** Molecular graph, electronic energy and geometry of the (Pz-Cu)<sub>3</sub>:X<sup>-n</sup> complexes.

|                                                                                    |                               |
|------------------------------------------------------------------------------------|-------------------------------|
| 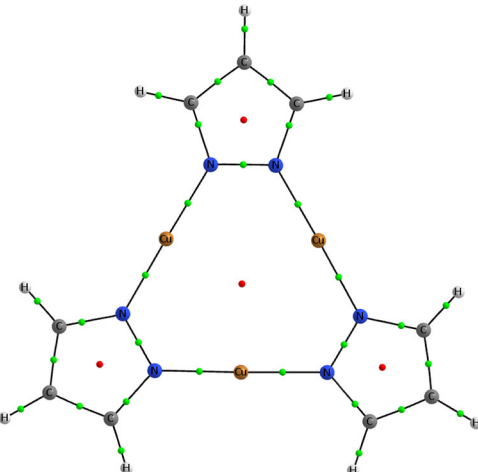 | MP2= -1265.30943599 NIMAG= 0  |
|                                                                                    | X                             |
|                                                                                    | X,1,r21                       |
|                                                                                    | X,1,r21,2,120.                |
|                                                                                    | X,1,r21,2,120.,3,180.,0       |
|                                                                                    | N,2,r52,1,90.,3,0.,0          |
|                                                                                    | N,2,r52,1,90.,4,0.,0          |
|                                                                                    | N,3,r52,1,90.,2,0.,0          |
|                                                                                    | N,3,r52,1,90.,4,0.,0          |
|                                                                                    | N,4,r52,1,90.,3,0.,0          |
|                                                                                    | N,4,r52,1,90.,2,0.,0          |
|                                                                                    | C,5,r115,2,a1152,1,180.,0     |
|                                                                                    | C,6,r115,2,a1152,1,180.,0     |
|                                                                                    | C,7,r115,3,a1152,1,180.,0     |
|                                                                                    | C,8,r115,3,a1152,1,180.,0     |
|                                                                                    | C,9,r115,4,a1152,1,180.,0     |
|                                                                                    | C,10,r115,4,a1152,1,180.,0    |
|                                                                                    | C,1,r171,3,120.,2,0.,0        |
|                                                                                    | C,1,r171,4,120.,3,0.,0        |
|                                                                                    | C,1,r171,2,120.,4,0.,0        |
|                                                                                    | H,11,r2011,5,a20115,2,180.,0  |
|                                                                                    | H,12,r2011,6,a20115,2,180.,0  |
|                                                                                    | H,13,r2011,7,a20115,3,180.,0  |
|                                                                                    | H,14,r2011,8,a20115,3,180.,0  |
|                                                                                    | H,15,r2011,9,a20115,4,180.,0  |
|                                                                                    | H,16,r2011,10,a20115,4,180.,0 |
|                                                                                    | H,1,r261,3,120.,2,0.,0        |
|                                                                                    | H,1,r261,4,120.,3,0.,0        |
|                                                                                    | H,1,r261,2,120.,4,0.,0        |
|                                                                                    | Cu,1,r291,3,60.,2,0.,0        |
|                                                                                    | Cu,1,r291,4,60.,3,0.,0        |
|                                                                                    | Cu,1,r291,2,60.,4,0.,0        |
|                                                                                    | r21=2.49391542                |
|                                                                                    | r52=0.68517656                |
|                                                                                    | r115=1.36634178               |
|                                                                                    | r171=4.64884563               |
|                                                                                    | r2011=1.08892227              |
|                                                                                    | r261=5.73710754               |
|                                                                                    | r291=1.85459423               |
|                                                                                    | a1152=108.21748163            |
|                                                                                    | a20115=120.11537875           |

|                                                                                     |                                          |
|-------------------------------------------------------------------------------------|------------------------------------------|
| 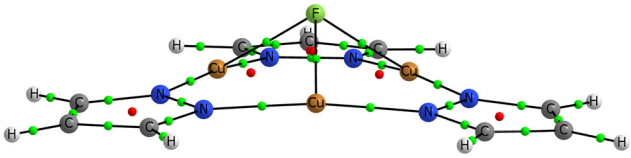 | MP2= -1365.05306570 NIMAG= 0             |
|                                                                                     | N,0.686985083,2.5188796847,0.0162671161  |
|                                                                                     | N,-                                      |
|                                                                                     | 0.6870979556,2.5189761251,0.0162613917   |
|                                                                                     | N,2.5249251179,-                         |
|                                                                                     | 0.6644761179,0.0162611276                |
|                                                                                     | N,1.8379307704,-                         |
|                                                                                     | 1.8544851676,0.0162503429                |
|                                                                                     | N,-1.8379506548,-                        |
|                                                                                     | 1.8544124181,0.016244903                 |
|                                                                                     | N,-2.52503866,-0.6644688411,0.0162354006 |
|                                                                                     | C,1.1112828867,3.8119968856,0.123550136  |
|                                                                                     | 8                                        |
|                                                                                     | C,-                                      |
|                                                                                     | 1.1111932548,3.8121479414,0.1235451682   |
|                                                                                     | C,3.8569335789,-0.943640824,0.1234868565 |
|                                                                                     | C,2.745763744,-2.8683944107,0.1234699896 |
|                                                                                     | C,-2.7457029753,-                        |
|                                                                                     | 2.8683995782,0.1234366781                |
|                                                                                     | C,-3.8570335117,-                        |
|                                                                                     | 0.9437281407,0.1234249828                |
|                                                                                     | C,0.0001070475,4.6736328286,0.187985139  |
|                                                                                     | 5                                        |
|                                                                                     | C,4.0474872087,-2.336767153,0.1880844424 |
|                                                                                     | C,-4.0474662678,-                        |
|                                                                                     | 2.3368657435,0.1881454783                |
|                                                                                     | H,2.1778568194,4.0302603416,0.149487298  |
|                                                                                     | 2                                        |
|                                                                                     | H,-                                      |
|                                                                                     | 2.1777389769,4.0305464578,0.1494779514   |
|                                                                                     | H,4.5792678287,-                         |
|                                                                                     | 0.1291147408,0.1493971196                |
|                                                                                     | H,2.4015980576,-                         |
|                                                                                     | 3.9012402285,0.1493621317                |
|                                                                                     | H,-2.4014471189,-                        |
|                                                                                     | 3.901212967,0.1493089606                 |
|                                                                                     | H,-4.5794390187,-                        |
|                                                                                     | 0.1292627477,0.1492876056                |
|                                                                                     | H,0.0001809541,5.7601237179,0.270572407  |
|                                                                                     | 8                                        |
|                                                                                     | H,4.9884313658,-                         |
|                                                                                     | 2.8799707239,0.2707702184                |

|  |                                                                                                                                                                                                                                                                                                                                                                                                                                                                                                                                                                                                                                                                                                                                                                                                                                                                                                                                                                                                         |
|--|---------------------------------------------------------------------------------------------------------------------------------------------------------------------------------------------------------------------------------------------------------------------------------------------------------------------------------------------------------------------------------------------------------------------------------------------------------------------------------------------------------------------------------------------------------------------------------------------------------------------------------------------------------------------------------------------------------------------------------------------------------------------------------------------------------------------------------------------------------------------------------------------------------------------------------------------------------------------------------------------------------|
|  | <p>H,-4.9883612942,-<br/>2.8801457192,0.2708904207<br/>Cu,1.5696330879,0.906253833,-<br/>0.102368143<br/>Cu,-0.0000129908,-1.8125702477,-<br/>0.1024046546<br/>Cu,-1.5698380526,0.9063165117,-<br/>0.1023856193<br/>F,-0.0000628182,0.0000214356,-<br/>1.2313911312</p>                                                                                                                                                                                                                                                                                                                                                                                                                                                                                                                                                                                                                                                                                                                                 |
|  | <p>MP2= -1365.04081154 NIMAG= 0<br/>N,-0.6843596385,0,-2.6945780783<br/>N,0.6843596385,0,-2.6945780783<br/>N,-2.5563172697,0,0.4248884925<br/>N,-1.8303680365,0,1.586102275<br/>N,1.8303680365,0,1.586102275<br/>N,2.5563172697,0,0.4248884925<br/>C,-1.1120075647,0,-3.9920762603<br/>C,1.1120075647,0,-3.9920762603<br/>C,-3.8877630448,0,0.7433775147<br/>C,-2.7008930959,0,2.6353328471<br/>C,2.7008930959,0,2.6353328471<br/>C,3.8877630448,0,0.7433775147<br/>C,0,0,-4.8525783728<br/>C,-4.0213397566,0,2.1439512732<br/>C,4.0213397566,0,2.1439512732<br/>H,-2.1783817174,0,-4.2126404155<br/>H,2.1783817174,0,-4.2126404155<br/>H,-4.6403662067,0,-0.0451031743<br/>H,-2.2741711033,0,3.6389095102<br/>H,2.2741711033,0,3.6389095102<br/>H,4.6403662067,0,-0.0451031743<br/>H,0,0,-5.9415104408<br/>H,-4.9466073638,0,2.7193073255<br/>H,4.9466073638,0,2.7193073255<br/>Cu,-1.6159896501,0,-1.1266289386<br/>Cu,0,0,1.763661584<br/>Cu,1.6159896501,0,-1.1266289386<br/>F,0,0,3.7794949636</p> |

|                                                                                     |                                                                                                                                                                                                                                                                                                                                                                                                                                                                                                                                                                                                                                                                                                                                                                                                                                                                                                                                                                                                                                                                                                                                               |
|-------------------------------------------------------------------------------------|-----------------------------------------------------------------------------------------------------------------------------------------------------------------------------------------------------------------------------------------------------------------------------------------------------------------------------------------------------------------------------------------------------------------------------------------------------------------------------------------------------------------------------------------------------------------------------------------------------------------------------------------------------------------------------------------------------------------------------------------------------------------------------------------------------------------------------------------------------------------------------------------------------------------------------------------------------------------------------------------------------------------------------------------------------------------------------------------------------------------------------------------------|
| 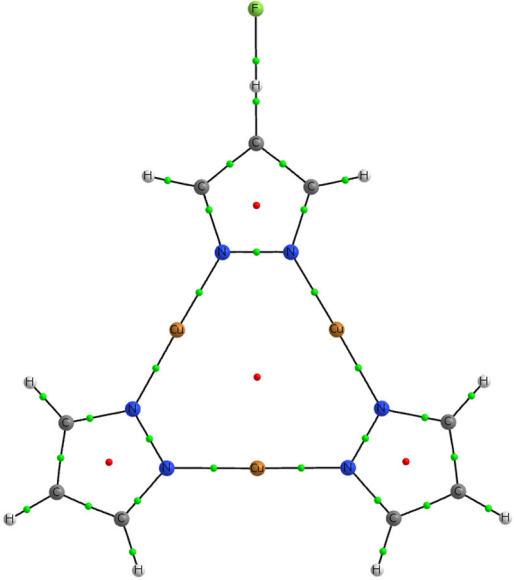  | <p>MP2= -1365.00462497 NIMAG= 0</p> <p>N,-0.6875858922,0.,-10.8121894917</p> <p>N,0.6875858922,0.,-10.8121894917</p> <p>N,-2.4978420479,0.,-7.6673964034</p> <p>N,-1.8181290769,0.,-6.4782832058</p> <p>N,1.8181290769,0.,-6.4782832058</p> <p>N,2.4978420479,0.,-7.6673964034</p> <p>C,-1.0999707452,0.,-12.1237625737</p> <p>C,1.0999707452,0.,-12.1237625737</p> <p>C,-3.834747142,0.,-7.392550068</p> <p>C,-2.73124605,0.,-5.4604908244</p> <p>C,2.73124605,0.,-5.4604908244</p> <p>C,3.834747142,0.,-7.392550068</p> <p>C,0.,0.,-13.0015554681</p> <p>C,-4.0279779934,0.,-5.9997283154</p> <p>C,4.0279779934,0.,-5.9997283154</p> <p>H,-2.1678655477,0.,-12.3450011184</p> <p>H,2.1678655477,0.,-12.3450011184</p> <p>H,-4.5570298688,0.,-8.2074944785</p> <p>H,-2.3944357188,0.,-4.4248601848</p> <p>H,2.3944357188,0.,-4.4248601848</p> <p>H,4.5570298688,0.,-8.2074944785</p> <p>H,0.,0.,-14.1523338568</p> <p>H,-4.9731067249,0.,-5.459581118</p> <p>H,4.9731067249,0.,-5.459581118</p> <p>Cu,-1.6007735225,0.,-9.2547657289</p> <p>Cu,0.,0.,-6.4724583933</p> <p>Cu,1.6007735225,0.,-9.2547657289</p> <p>F,0.,0.,-15.7033644919</p> |
|  | <p>MP2= -1725.07834839 NIMAG= 0</p> <p>N,0.6855128138,2.5150704687,-0.0163992513</p> <p>N,-0.6855251099,2.5150421796,-0.0164166807</p> <p>N,2.5209067205,-0.6638627454,-0.0164221605</p> <p>N,1.8353617657,-1.851192956,-0.0163991263</p> <p>N,-1.8353481588,-1.8511667539,-0.0164009983</p> <p>N,-2.5208854105,-0.6638278683,-0.0164350464</p>                                                                                                                                                                                                                                                                                                                                                                                                                                                                                                                                                                                                                                                                                                                                                                                               |

|  |                                         |
|--|-----------------------------------------|
|  | C,1.1117090782,3.799213522,0.1655606944 |
|  | C,-                                     |
|  | 1.1117558667,3.7991800173,0.1654977579  |
|  | C,3.8461109931,-                        |
|  | 0.9368466984,0.165478738                |
|  | C,2.7343339116,-                        |
|  | 2.8623957084,0.1655231827               |
|  | C,-2.7343272514,-                       |
|  | 2.8623624191,0.1655501789               |
|  | C,-3.8460869076,-                       |
|  | 0.9368016751,0.1654884751               |
|  | C,-                                     |
|  | 0.0000372457,4.6552260663,0.2788529366  |
|  | C,4.0315592536,-                        |
|  | 2.3276526081,0.2788084276               |
|  | C,-4.0315437151,-                       |
|  | 2.3276052234,0.2788459422               |
|  | H,2.1783438726,4.0167363529,0.20146320  |
|  | 41                                      |
|  | H,-                                     |
|  | 2.1783967966,4.0166790739,0.2013399501  |
|  | H,4.5678178658,-                        |
|  | 0.1218818096,0.201337721                |
|  | H,2.3893559374,-                        |
|  | 3.8948754762,0.2014261644               |
|  | H,-2.3893641947,-                       |
|  | 3.8948477201,0.2014556463               |
|  | H,-4.5677857165,-                       |
|  | 0.1218297369,0.2013292212               |
|  | H,-                                     |
|  | 0.0000539965,5.7357110181,0.4193819536  |
|  | H,4.9672759559,-2.8679159516,0.41932989 |
|  | H,-4.967263956,-                        |
|  | 2.8678596075,0.4193790553               |
|  | Cu,1.5573106226,0.8990846545,-          |
|  | 0.2020603201                            |
|  | Cu,0.0000097313,-1.7981096418,-         |
|  | 0.2020478598                            |
|  | Cu,-1.5572738174,0.8990967436,-         |
|  | 0.2021172133                            |
|  | Cl,0.0000396216,-0.0000055038,-         |
|  | 2.0186967624                            |



|                                                                                    |                                  |
|------------------------------------------------------------------------------------|----------------------------------|
| 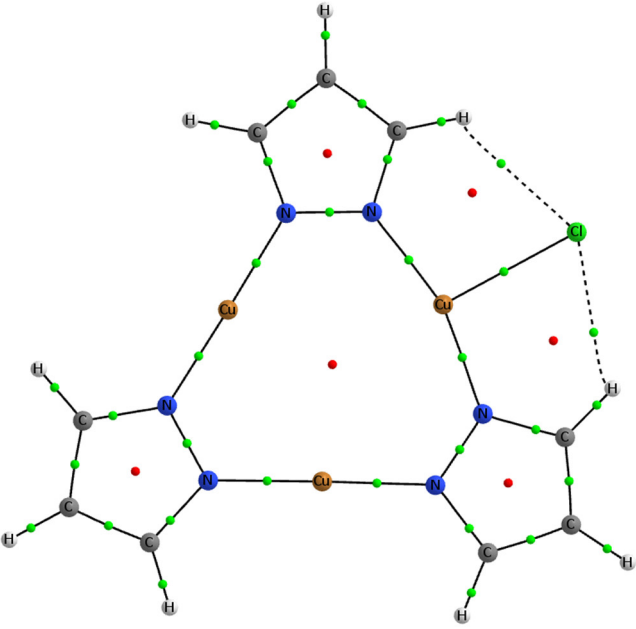 | MP2= -1725.07480464 NIMAG= 0     |
|                                                                                    | N,-0.6840256023,0,-2.7052222836  |
|                                                                                    | N,0.6840256023,0,-2.7052222836   |
|                                                                                    | N,-2.4853905617,0,0.4457624952   |
|                                                                                    | N,-1.8438486766,0,1.6587192415   |
|                                                                                    | N,1.8438486766,0,1.6587192415    |
|                                                                                    | N,2.4853905617,0,0.4457624952    |
|                                                                                    | C,-1.1129627489,0,-4.0017992679  |
|                                                                                    | C,1.1129627489,0,-4.0017992679   |
|                                                                                    | C,-3.8381517048,0,0.6615803732   |
|                                                                                    | C,-2.8003285729,0,2.6331216235   |
|                                                                                    | C,2.8003285729,0,2.6331216235    |
|                                                                                    | C,3.8381517048,0,0.6615803732    |
|                                                                                    | C,0,0,-4.861249712               |
|                                                                                    | C,-4.0790673725,0,2.0450727069   |
|                                                                                    | C,4.0790673725,0,2.0450727069    |
|                                                                                    | H,-2.1791978152,0,-4.2229894623  |
|                                                                                    | H,2.1791978152,0,-4.2229894623   |
|                                                                                    | H,-4.527112547,0,-0.1831869739   |
|                                                                                    | H,-2.4776374526,0,3.6735267945   |
|                                                                                    | H,2.4776374526,0,3.6735267945    |
|                                                                                    | H,4.527112547,0,-0.1831869739    |
|                                                                                    | H,0,0,-5.9500606632              |
|                                                                                    | H,-5.0436216973,0,2.5513404874   |
|                                                                                    | H,5.0436216973,0,2.5513404874    |
|                                                                                    | Cu,-1.5688183432,0,-1.1140439207 |
|                                                                                    | Cu,0,0,1.9442950537              |
|                                                                                    | Cu,1.5688183432,0,-1.1140439207  |
|                                                                                    | Cl,0,0,4.3740041705              |

|                                                                                     |                                                                                                                                                                                                                                                                                                                                                                                                                                                                                                                                                                                                                                                                                                                                                                                                                                                                                                                                                                                                                                                                                                                  |
|-------------------------------------------------------------------------------------|------------------------------------------------------------------------------------------------------------------------------------------------------------------------------------------------------------------------------------------------------------------------------------------------------------------------------------------------------------------------------------------------------------------------------------------------------------------------------------------------------------------------------------------------------------------------------------------------------------------------------------------------------------------------------------------------------------------------------------------------------------------------------------------------------------------------------------------------------------------------------------------------------------------------------------------------------------------------------------------------------------------------------------------------------------------------------------------------------------------|
| 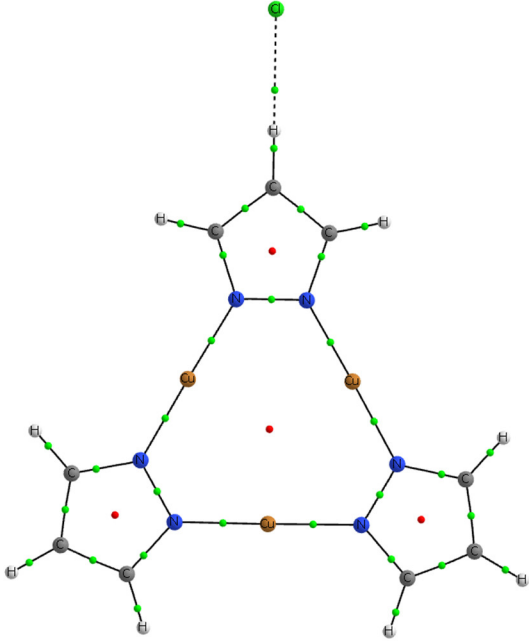  | <p>MP2= -1725.04771008 NIMAG= 0</p> <p>N,-0.6870325399,0,-10.790425632</p> <p>N,0.6870325399,0,-10.790425632</p> <p>N,-2.4981865692,0,-7.6440384859</p> <p>N,-1.8178503724,0,-6.4551119499</p> <p>N,1.8178503724,0,-6.4551119499</p> <p>N,2.4981865692,0,-7.6440384859</p> <p>C,-1.1060969794,0,-12.0960771275</p> <p>C,1.1060969794,0,-12.0960771275</p> <p>C,-3.8353234421,0,-7.3692525211</p> <p>C,-2.7309738311,0,-5.4377094503</p> <p>C,2.7309738311,0,-5.4377094503</p> <p>C,3.8353234421,0,-7.3692525211</p> <p>C,0,0,-12.9609294259</p> <p>C,-4.0277667659,0,-5.9767406202</p> <p>C,4.0277667659,0,-5.9767406202</p> <p>H,-2.1713200717,0,-12.3246215867</p> <p>H,2.1713200717,0,-12.3246215867</p> <p>H,-4.55813137,0,-8.1837287593</p> <p>H,-2.394365026,0,-4.4020370526</p> <p>H,2.394365026,0,-4.4020370526</p> <p>H,4.55813137,0,-8.1837287593</p> <p>H,0,0,-14.0619893265</p> <p>H,-4.9726854107,0,-5.4364145387</p> <p>H,4.9726854107,0,-5.4364145387</p> <p>Cu,-1.6020043835,0,-9.2302271682</p> <p>Cu,0,0,-6.4470263381</p> <p>Cu,1.6020043835,0,-9.2302271682</p> <p>Cl,0,0,-16.4192017066</p> |
|  | <p>MP2= -1681.06662494 NIMAG= 0</p> <p>N,0.6850400295,-</p> <p>0.1101182553,2.5133088822</p> <p>N,-0.6850889835,-</p> <p>0.1101440945,2.5133342746</p> <p>N,2.5191687567,-0.1101320505,-</p> <p>0.6633909732</p> <p>N,1.8341193884,-0.1101203042,-</p> <p>1.8499536979</p> <p>N,-1.8341003149,-0.1100912801,-</p> <p>1.8499527345</p> <p>N,-2.5191546542,-0.1101125597,-</p> <p>0.6633773526</p>                                                                                                                                                                                                                                                                                                                                                                                                                                                                                                                                                                                                                                                                                                                 |

|  |                                                                                                                                                                                                                                                                                                                                                                                                                                                                                                                                                                                                                                                                                                                                                                                                                                                                                                                                                                                                                                                                                                                 |
|--|-----------------------------------------------------------------------------------------------------------------------------------------------------------------------------------------------------------------------------------------------------------------------------------------------------------------------------------------------------------------------------------------------------------------------------------------------------------------------------------------------------------------------------------------------------------------------------------------------------------------------------------------------------------------------------------------------------------------------------------------------------------------------------------------------------------------------------------------------------------------------------------------------------------------------------------------------------------------------------------------------------------------------------------------------------------------------------------------------------------------|
|  | C,1.1118605567,0.0833335596,3.795628152<br>4<br>C,-<br>1.1118766369,0.0832705109,3.7956700094<br>C,3.8430990349,0.0833215868,-<br>0.9349112672<br>C,2.7312583983,0.0832412541,-<br>2.8607411969<br>C,-2.7312369306,0.0833161254,-<br>2.8607314987<br>C,-3.8430853065,0.0833454321,-<br>0.934907023<br>C,0.0000043666,0.2041648035,4.650464128<br>4<br>C,4.0274643469,0.2042266979,-<br>2.3252220902<br>C,-4.0274559987,0.204198838,-<br>2.3252204202<br>H,2.178529695,0.1196123206,4.013000289<br>H,-<br>2.1785404847,0.1194910432,4.0130794414<br>H,4.5646856711,0.1195834832,-<br>0.1198360288<br>H,2.3862089605,0.1194295479,-<br>3.8932048337<br>H,-2.3861808554,0.1195473075,-<br>3.8931917303<br>H,-4.5646773709,0.1196012414,-<br>0.1198360633<br>H,0.0000203977,0.3532915075,5.729790142<br>3<br>H,4.9621867085,0.3533939083,-<br>2.8648756497<br>H,-4.9621852111,0.3533236344,-<br>2.8648739979<br>Cu,1.5562299583,-<br>0.3060171617,0.89848021<br>Cu,0.0000147106,-0.3059815271,-<br>1.7970269509<br>Cu,-1.5562929714,-<br>0.306042057,0.898516872<br>Br,-0.000015261,-2.3109335117,-<br>0.0000188923 |
|--|-----------------------------------------------------------------------------------------------------------------------------------------------------------------------------------------------------------------------------------------------------------------------------------------------------------------------------------------------------------------------------------------------------------------------------------------------------------------------------------------------------------------------------------------------------------------------------------------------------------------------------------------------------------------------------------------------------------------------------------------------------------------------------------------------------------------------------------------------------------------------------------------------------------------------------------------------------------------------------------------------------------------------------------------------------------------------------------------------------------------|

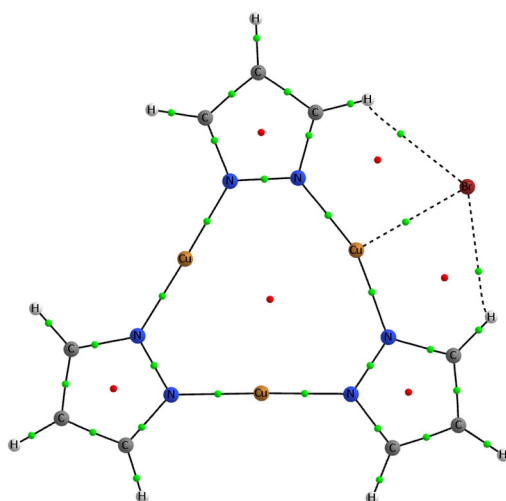

MP2= -1681.06247072 NIMAG= 0  
 N,-0.6839129762,0,-2.7091083677  
 N,0.6839129762,0,-2.7091083677  
 N,-2.4697199599,0,0.4487525566  
 N,-1.8459707228,0,1.671739356  
 N,1.8459707228,0,1.671739356  
 N,2.4697199599,0,0.4487525566  
 C,-1.113201974,0,-4.0054672217  
 C,1.113201974,0,-4.0054672217  
 C,-3.8257128408,0,0.6438020175  
 C,-2.8190847386,0,2.6300074155  
 C,2.8190847386,0,2.6300074155  
 C,3.8257128408,0,0.6438020175  
 C,0,0,-4.86466821  
 C,-4.0883477706,0,2.0227594208  
 C,4.0883477706,0,2.0227594208  
 H,-2.1794123351,0,-4.226719722  
 H,2.1794123351,0,-4.226719722  
 H,-4.5011673301,0,-0.2118372021  
 H,-2.5185260383,0,3.6766480173  
 H,2.5185260383,0,3.6766480173  
 H,4.5011673301,0,-0.2118372021  
 H,0,0,-5.9534556105  
 H,-5.0600874531,0,2.5148664302  
 H,5.0600874531,0,2.5148664302  
 Cu,-1.5572171373,0,-1.1123627598  
 Cu,0,0,1.9740946813  
 Cu,1.5572171373,0,-1.1123627598  
 Br,0,0,4.5486217363

|                                                                                     |                                                                                                                                                                                                                                                                                                                                                                                                                                                                                                                                                                                                                                                                                                                                                                                                                                                                                                                                                                                                                                                                                                                  |
|-------------------------------------------------------------------------------------|------------------------------------------------------------------------------------------------------------------------------------------------------------------------------------------------------------------------------------------------------------------------------------------------------------------------------------------------------------------------------------------------------------------------------------------------------------------------------------------------------------------------------------------------------------------------------------------------------------------------------------------------------------------------------------------------------------------------------------------------------------------------------------------------------------------------------------------------------------------------------------------------------------------------------------------------------------------------------------------------------------------------------------------------------------------------------------------------------------------|
| 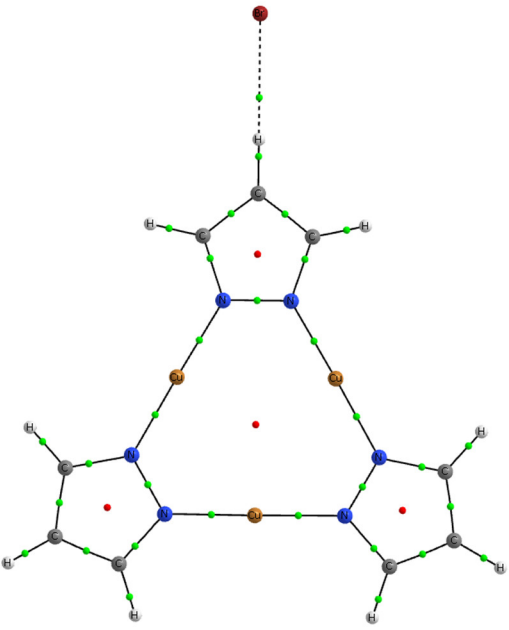  | <p>MP2= -1681.03783540 NIMAG= 0</p> <p>N,-0.6868875416,0,-10.7843400592</p> <p>N,0.6868875416,0,-10.7843400592</p> <p>N,-2.4986172386,0,-7.6378798611</p> <p>N,-1.8179093903,0,-6.4491386349</p> <p>N,1.8179093903,0,-6.4491386349</p> <p>N,2.4986172386,0,-7.6378798611</p> <p>C,-1.1068506079,0,-12.0892274237</p> <p>C,1.1068506079,0,-12.0892274237</p> <p>C,-3.835790008,0,-7.3628324554</p> <p>C,-2.7308856168,0,-5.4316056356</p> <p>C,2.7308856168,0,-5.4316056356</p> <p>C,3.835790008,0,-7.3628324554</p> <p>C,0,0,-12.9525787217</p> <p>C,-4.0277723418,0,-5.97036245</p> <p>C,4.0277723418,0,-5.97036245</p> <p>H,-2.1718351127,0,-12.3184215305</p> <p>H,2.1718351127,0,-12.3184215305</p> <p>H,-4.5588709084,0,-8.1770696907</p> <p>H,-2.3941291424,0,-4.3959897279</p> <p>H,2.3941291424,0,-4.3959897279</p> <p>H,4.5588709084,0,-8.1770696907</p> <p>H,0,0,-14.0503572796</p> <p>H,-4.9725520185,0,-5.4298067155</p> <p>H,4.9725520185,0,-5.4298067155</p> <p>Cu,-1.6026166437,0,-9.223906773</p> <p>Cu,0,0,-6.4404417938</p> <p>Cu,1.6026166437,0,-9.223906773</p> <p>Br,0,0,-16.5973768637</p> |
|  | <p>MP2= -1464.65453414 NIMAG= 0</p> <p>X</p> <p>X,1,r21</p> <p>X,1,r21,2,120.</p> <p>X,1,r21,2,120.,3,180.,0</p> <p>N,2,r52,1,90.,3,0.,0</p> <p>N,2,r52,1,90.,4,0.,0</p> <p>N,3,r52,1,90.,2,0.,0</p> <p>N,3,r52,1,90.,4,0.,0</p> <p>N,4,r52,1,90.,3,0.,0</p> <p>N,4,r52,1,90.,2,0.,0</p> <p>C,5,r115,2,a1152,1,180.,0</p> <p>C,6,r115,2,a1152,1,180.,0</p>                                                                                                                                                                                                                                                                                                                                                                                                                                                                                                                                                                                                                                                                                                                                                       |

|  |                               |
|--|-------------------------------|
|  | C,7,r115,3,a1152,1,180.,0     |
|  | C,8,r115,3,a1152,1,180.,0     |
|  | C,9,r115,4,a1152,1,180.,0     |
|  | C,10,r115,4,a1152,1,180.,0    |
|  | C,1,r171,3,120.,2,0.,0        |
|  | C,1,r171,4,120.,3,0.,0        |
|  | C,1,r171,2,120.,4,0.,0        |
|  | H,11,r2011,5,a20115,2,180.,0  |
|  | H,12,r2011,6,a20115,2,180.,0  |
|  | H,13,r2011,7,a20115,3,180.,0  |
|  | H,14,r2011,8,a20115,3,180.,0  |
|  | H,15,r2011,9,a20115,4,180.,0  |
|  | H,16,r2011,10,a20115,4,180.,0 |
|  | H,1,r261,3,120.,2,0.,0        |
|  | H,1,r261,4,120.,3,0.,0        |
|  | H,1,r261,2,120.,4,0.,0        |
|  | Cu,1,r291,3,60.,2,0.,0        |
|  | Cu,1,r291,4,60.,3,0.,0        |
|  | Cu,1,r291,2,60.,4,0.,0        |
|  | F,1,rcl,2,90.,3,90.,0         |
|  | F,1,rcl,2,90.,3,-90.,0        |
|  | r21=2.53606214                |
|  | r52=0.68717892                |
|  | r115=1.36470525               |
|  | r171=4.70335136               |
|  | r2011=1.08937051              |
|  | r261=5.79505867               |
|  | r291=1.75190017               |
|  | a1152=108.11361618            |
|  | a20115=119.54685991           |
|  | rcl=1.3487393                 |

|                                                                                    |                                  |
|------------------------------------------------------------------------------------|----------------------------------|
| 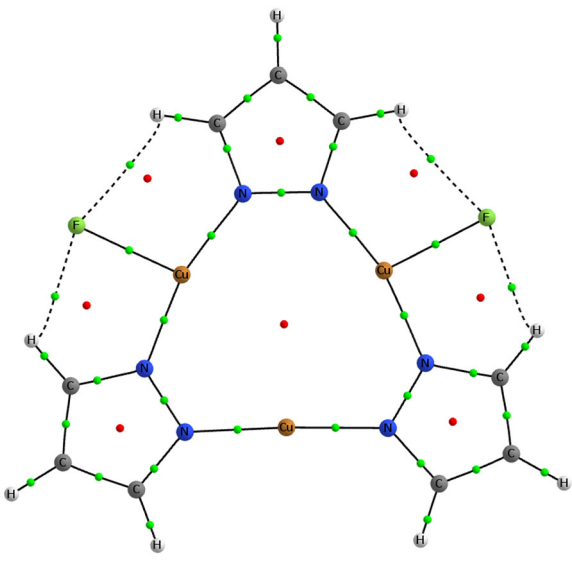 | MP2= -1464.67268461 NIMAG= 0     |
|                                                                                    | N,0.6867279058,0.,2.5179912093   |
|                                                                                    | N,-0.6825049132,0.,2.500369      |
|                                                                                    | N,2.5117690541,0.,-0.6574584142  |
|                                                                                    | N,1.8252602157,0.,-1.8465266022  |
|                                                                                    | N,-1.8372804008,0.,-1.8537194166 |
|                                                                                    | N,-2.5066355295,0.,-0.6591179071 |
|                                                                                    | C,1.1006344469,0.,3.8164786151   |
|                                                                                    | C,-1.1327118858,0.,3.7944577166  |
|                                                                                    | C,3.8504478917,0.,-0.9330566956  |
|                                                                                    | C,2.7332747475,0.,-2.8680573423  |
|                                                                                    | C,-2.7548502102,0.,-2.861416699  |
|                                                                                    | C,-3.852452719,0.,-0.9162715902  |
|                                                                                    | C,-0.0257314844,0.,4.6663883114  |
|                                                                                    | C,4.037921737,0.,-2.3312952018   |
|                                                                                    | C,-4.0540765637,0.,-2.3109100367 |
|                                                                                    | H,2.1783254272,0.,3.9893293367   |
|                                                                                    | H,-2.2035044489,0.,4.0008596095  |
|                                                                                    | H,4.5434671965,0.,-0.0905160651  |
|                                                                                    | H,2.3501228101,0.,-3.8894999809  |
|                                                                                    | H,-2.365697836,0.,-3.8811498261  |
|                                                                                    | H,-4.5665982832,0.,-0.0921389748 |
|                                                                                    | H,-0.0421725102,0.,5.7570279473  |
|                                                                                    | H,4.9831465557,0.,-2.8770210052  |
|                                                                                    | H,-5.0068187077,0.,-2.8419915086 |
|                                                                                    | Cu,1.8143024254,0.,1.0509451009  |
|                                                                                    | Cu,-0.0029939426,0.,-2.096704541 |
|                                                                                    | Cu,-1.5507032994,0.,0.8952989673 |
|                                                                                    | F,3.5592554765,0.,2.2003778423   |
|                                                                                    | F,-0.1259553711,0.,-4.1825945824 |

|                                                                                    |                                                                                                                                                                                                                                                                                                                                                                                                                                                                                                                                                                                                                                                                                                                                                                                                                                                                                                                                                                                                                                                       |
|------------------------------------------------------------------------------------|-------------------------------------------------------------------------------------------------------------------------------------------------------------------------------------------------------------------------------------------------------------------------------------------------------------------------------------------------------------------------------------------------------------------------------------------------------------------------------------------------------------------------------------------------------------------------------------------------------------------------------------------------------------------------------------------------------------------------------------------------------------------------------------------------------------------------------------------------------------------------------------------------------------------------------------------------------------------------------------------------------------------------------------------------------|
| 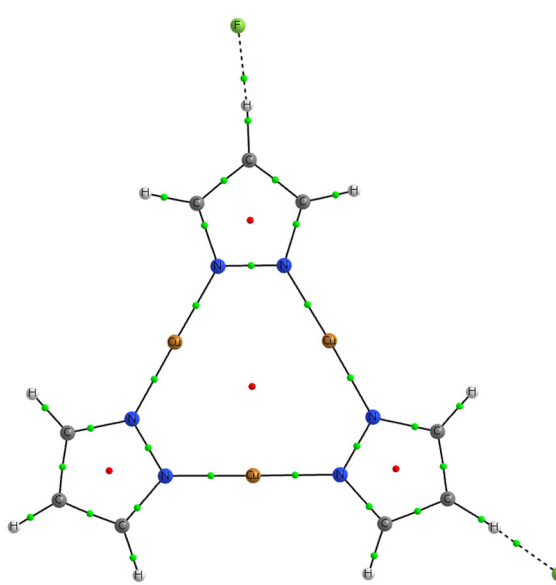 | MP2= -1464.64906893 NIMAG= 0<br>N,0.6844123785,0.,2.4433849046<br>N,-0.6844123785,0.,2.4433849046<br>N,2.5002460766,0.,-0.6997477987<br>N,1.818912451,0.,-1.8931441253<br>N,-1.818912451,0.,-1.8931441253<br>N,-2.5002460766,0.,-0.6997477987<br>C,1.1127954752,0.,3.7403016669<br>C,-1.1127954752,0.,3.7403016669<br>C,3.8448249593,0.,-0.9850728636<br>C,2.7548468699,0.,-2.8983373141<br>C,-2.7548468699,0.,-2.8983373141<br>C,-3.8448249593,0.,-0.9850728636<br>C,0.,0.,4.6002711458<br>C,4.0632156604,0.,-2.3743463307<br>C,-4.0632156604,0.,-2.3743463307<br>H,2.1794343494,0.,3.9601717331<br>H,-2.1794343494,0.,3.9601717331<br>H,4.565711037,0.,-0.1669647838<br>H,2.4175714148,0.,-3.9352140873<br>H,-2.4175714148,0.,-3.9352140873<br>H,-4.565711037,0.,-0.1669647838<br>H,0.,0.,5.6892173764<br>H,5.0618506598,0.,-2.9107254496<br>H,-5.0618506598,0.,-2.9107254496<br>Cu,1.6011623667,0.,0.8671410811<br>Cu,0.,0.,-1.9164068818<br>Cu,-1.6011623667,0.,0.8671410811<br>F,6.5781771841,0.,-3.583991933<br>F,-6.5781771841,0.,-3.583991933 |
|------------------------------------------------------------------------------------|-------------------------------------------------------------------------------------------------------------------------------------------------------------------------------------------------------------------------------------------------------------------------------------------------------------------------------------------------------------------------------------------------------------------------------------------------------------------------------------------------------------------------------------------------------------------------------------------------------------------------------------------------------------------------------------------------------------------------------------------------------------------------------------------------------------------------------------------------------------------------------------------------------------------------------------------------------------------------------------------------------------------------------------------------------|

|                                                                                     |                                                                                                                                                                                                                                                                        |
|-------------------------------------------------------------------------------------|------------------------------------------------------------------------------------------------------------------------------------------------------------------------------------------------------------------------------------------------------------------------|
| 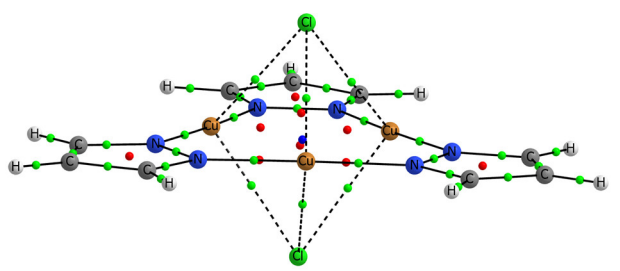 | MP2= -2184.71936737 NIMAG= 0<br>X<br>X,1,r21<br>X,1,r21,2,120.<br>X,1,r21,2,120.,3,180.,0<br>N,2,r52,1,90.,3,0.,0<br>N,2,r52,1,90.,4,0.,0<br>N,3,r52,1,90.,2,0.,0<br>N,3,r52,1,90.,4,0.,0<br>N,4,r52,1,90.,3,0.,0<br>N,4,r52,1,90.,2,0.,0<br>C,5,r115,2,a1152,1,180.,0 |
|-------------------------------------------------------------------------------------|------------------------------------------------------------------------------------------------------------------------------------------------------------------------------------------------------------------------------------------------------------------------|



|  |                               |
|--|-------------------------------|
|  | C,6,r115,2,a1152,1,180.,0     |
|  | C,7,r115,3,a1152,1,180.,0     |
|  | C,8,r115,3,a1152,1,180.,0     |
|  | C,9,r115,4,a1152,1,180.,0     |
|  | C,10,r115,4,a1152,1,180.,0    |
|  | C,1,r171,3,120.,2,0.,0        |
|  | C,1,r171,4,120.,3,0.,0        |
|  | C,1,r171,2,120.,4,0.,0        |
|  | H,11,r2011,5,a20115,2,180.,0  |
|  | H,12,r2011,6,a20115,2,180.,0  |
|  | H,13,r2011,7,a20115,3,180.,0  |
|  | H,14,r2011,8,a20115,3,180.,0  |
|  | H,15,r2011,9,a20115,4,180.,0  |
|  | H,16,r2011,10,a20115,4,180.,0 |
|  | H,1,r261,3,120.,2,0.,0        |
|  | H,1,r261,4,120.,3,0.,0        |
|  | H,1,r261,2,120.,4,0.,0        |
|  | Cu,1,r291,3,60.,2,0.,0        |
|  | Cu,1,r291,4,60.,3,0.,0        |
|  | Cu,1,r291,2,60.,4,0.,0        |
|  | Cl,1,rcl,2,90.,3,90.,0        |
|  | Cl,1,rcl,2,90.,3,-90.,0       |
|  | r21=2.54497958                |
|  | r52=0.68522631                |
|  | r115=1.36423941               |
|  | r171=4.71051379               |
|  | r2011=1.08973696              |
|  | r261=5.80182159               |
|  | r291=1.77597194               |
|  | a1152=108.19693856            |
|  | a20115=119.70143651           |
|  | rcl=2.04332573                |

|                                                                                     |                                                                                                                                                                                                                                                                                                                                                                                                                                                                                                                                                                                                                                                                                                                                                                                                                                                                                                                                                                                                                                                                                                                |
|-------------------------------------------------------------------------------------|----------------------------------------------------------------------------------------------------------------------------------------------------------------------------------------------------------------------------------------------------------------------------------------------------------------------------------------------------------------------------------------------------------------------------------------------------------------------------------------------------------------------------------------------------------------------------------------------------------------------------------------------------------------------------------------------------------------------------------------------------------------------------------------------------------------------------------------------------------------------------------------------------------------------------------------------------------------------------------------------------------------------------------------------------------------------------------------------------------------|
| 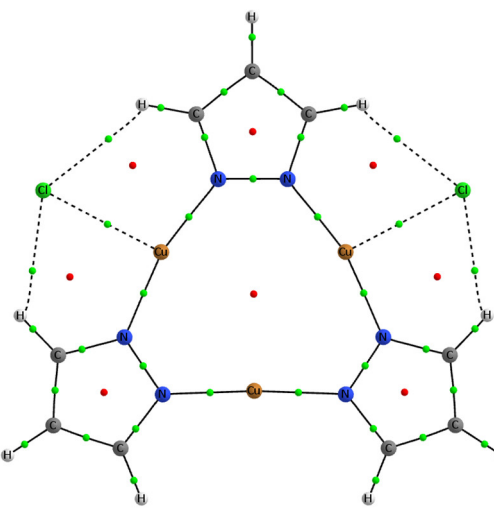  | <p>MP2= -2184.75417433 NIMAG= 0<br/> N,0.7106717196,0.,2.5552085806<br/> N,-0.6575304768,0.,2.476269808<br/> N,2.510318538,0.,-0.65385345<br/> N,1.821412967,0.,-1.8470729005<br/> N,-1.8575396829,0.,-1.8930640532<br/> N,-2.4732777987,0.,-0.6686968074<br/> C,1.0581217499,0.,3.8750016858<br/> C,-1.169216918,0.,3.7461131759<br/> C,3.8495251073,0.,-0.9344670254<br/> C,2.7340347366,0.,-2.8665530227<br/> C,-2.8267890246,0.,-2.8538611586<br/> C,-3.8288376348,0.,-0.8604850344<br/> C,-0.1065249215,0.,4.6680635264<br/> C,4.0340888282,0.,-2.3290822709<br/> C,-4.0959240611,0.,-2.2417784751<br/> H,2.1187047465,0.,4.1262126374<br/> H,-2.2486923008,0.,3.8988780029<br/> H,4.554198113,0.,-0.1030664731<br/> H,2.3663572405,0.,-3.8925180232<br/> H,-2.5140525921,0.,-3.8979584523<br/> H,-4.5008735472,0.,-0.0020143437<br/> H,-0.1703945117,0.,5.7563332671<br/> H,4.9785630358,0.,-2.8743747089<br/> H,-5.0703280978,0.,-2.7306006578<br/> Cu,1.8178413009,0.,1.0623716145<br/> Cu,-0.011120156,0.,-2.1054825539<br/> Cu,-1.5031726613,0.,0.8678571406<br/> Cl,4.053175986,0.,2.4655466819</p> |
|  | <p>MP2= -2184.74426696 NIMAG= 0<br/> N,0.6845829697,0.,2.4234402938<br/> N,-0.6845829697,0.,2.4234402938<br/> N,2.499640814,0.,-0.7222221747<br/> N,1.8187363245,0.,-1.9148471021<br/> N,-1.8187363245,0.,-1.9148471021<br/> N,-2.499640814,0.,-0.7222221747<br/> C,1.1128299442,0.,3.7204594977<br/> C,-1.1128299442,0.,3.7204594977<br/> C,3.842013863,0.,-0.9994484106<br/> C,2.7471323694,0.,-2.9234615078<br/> C,-2.7471323694,0.,-2.9234615078<br/> C,-3.842013863,0.,-0.9994484106<br/> C,0.,0.,4.5795374915</p>                                                                                                                                                                                                                                                                                                                                                                                                                                                                                                                                                                                        |

|                                                                                     |                                                                                                                                                                                                                                                                                                                                                                                                                                                                                                                                                                                                                                                                                                         |
|-------------------------------------------------------------------------------------|---------------------------------------------------------------------------------------------------------------------------------------------------------------------------------------------------------------------------------------------------------------------------------------------------------------------------------------------------------------------------------------------------------------------------------------------------------------------------------------------------------------------------------------------------------------------------------------------------------------------------------------------------------------------------------------------------------|
|                                                                                     | C,4.0472053496,0.,-2.3877562736<br>C,-4.0472053496,0.,-2.3877562736<br>H,2.1792701299,0.,3.9411612076<br>H,-2.1792701299,0.,3.9411612076<br>H,4.5708850911,0.,-0.1900494603<br>H,2.4136725845,0.,-3.9606730566<br>H,-2.4136725845,0.,-3.9606730566<br>H,-4.5708850911,0.,-0.1900494603<br>H,0.,0.,5.6682888006<br>H,5.0180968728,0.,-2.8985250395<br>H,-5.0180968728,0.,-2.8985250395<br>Cu,1.6019874969,0.,0.8494690479<br>Cu,0.,0.,-1.9376702754<br>Cu,-1.6019874969,0.,0.8494690479<br>Cl,7.5113542459,0.,-3.3426250284<br>Cl,-7.5113542459,0.,-3.3426250284                                                                                                                                         |
| 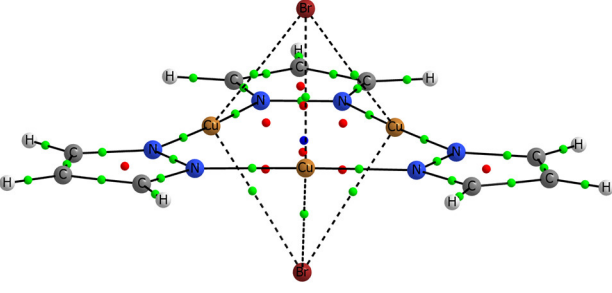 | MP2= -2096.70196565 NIMAG= 0<br>X<br>X,1,r21<br>X,1,r21,2,120.<br>X,1,r21,2,120.,3,180.,0<br>N,2,r52,1,90.,3,0.,0<br>N,2,r52,1,90.,4,0.,0<br>N,3,r52,1,90.,2,0.,0<br>N,3,r52,1,90.,4,0.,0<br>N,4,r52,1,90.,3,0.,0<br>N,4,r52,1,90.,2,0.,0<br>C,5,r115,2,a1152,1,180.,0<br>C,6,r115,2,a1152,1,180.,0<br>C,7,r115,3,a1152,1,180.,0<br>C,8,r115,3,a1152,1,180.,0<br>C,9,r115,4,a1152,1,180.,0<br>C,10,r115,4,a1152,1,180.,0<br>C,1,r171,3,120.,2,0.,0<br>C,1,r171,4,120.,3,0.,0<br>C,1,r171,2,120.,4,0.,0<br>H,11,r2011,5,a20115,2,180.,0<br>H,12,r2011,6,a20115,2,180.,0<br>H,13,r2011,7,a20115,3,180.,0<br>H,14,r2011,8,a20115,3,180.,0<br>H,15,r2011,9,a20115,4,180.,0<br>H,16,r2011,10,a20115,4,180.,0 |

|                                                                                     |                                                                                                                                                                                                                                                                                                                                                                                                                                                                                                                                                                                                                                                                                                                                                                                                                                                                                                     |
|-------------------------------------------------------------------------------------|-----------------------------------------------------------------------------------------------------------------------------------------------------------------------------------------------------------------------------------------------------------------------------------------------------------------------------------------------------------------------------------------------------------------------------------------------------------------------------------------------------------------------------------------------------------------------------------------------------------------------------------------------------------------------------------------------------------------------------------------------------------------------------------------------------------------------------------------------------------------------------------------------------|
|                                                                                     | H,1,r261,3,120.,2,0.,0<br>H,1,r261,4,120.,3,0.,0<br>H,1,r261,2,120.,4,0.,0<br>Cu,1,r291,3,60.,2,0.,0<br>Cu,1,r291,4,60.,3,0.,0<br>Cu,1,r291,2,60.,4,0.,0<br>Br,1,rcl,2,90.,3,90.,0<br>Br,1,rcl,2,90.,3,-90.,0<br>r21=2.5388156<br>r52=0.6843305<br>r115=1.36410625<br>r171=4.70280233<br>r2011=1.08968088<br>r261=5.79387384<br>r291=1.77861966<br>a1152=108.25139646<br>a20115=119.75793801<br>rcl=2.28093476                                                                                                                                                                                                                                                                                                                                                                                                                                                                                      |
| 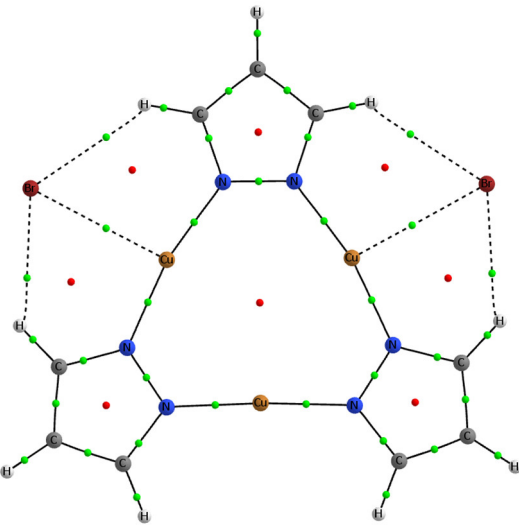 | MP2= -2096.73373352 NIMAG= 0<br>N,0.7393114761,0.,2.5344823242<br>N,-0.6294307014,0.,2.4591910189<br>N,2.5348832805,0.,-0.6684485026<br>N,1.8463350247,0.,-1.8610490652<br>N,-1.8252703401,0.,-1.9075036818<br>N,-2.4444372458,0.,-0.6844925322<br>C,1.0928980976,0.,3.8525930866<br>C,-1.135305385,0.,3.7309509228<br>C,3.8739311705,0.,-0.9477480452<br>C,2.7577394689,0.,-2.8810487835<br>C,-2.7899944346,0.,-2.8727740597<br>C,-3.7987509719,0.,-0.8822721571<br>C,-0.0693571591,0.,4.6482677876<br>C,4.0566076977,0.,-2.3420835462<br>C,-4.0601965672,0.,-2.2640688322<br>H,2.1536097496,0.,4.104014218<br>H,-2.2140332558,0.,3.887961268<br>H,4.5807292503,0.,-0.1181438731<br>H,2.3926802207,0.,-3.907955962<br>H,-2.4773756954,0.,-3.9170878621<br>H,-4.4740898549,0.,-0.0265715898<br>H,-0.128454298,0.,5.7364900757<br>H,5.0006614837,0.,-2.8871332537<br>H,-5.032173283,0.,-2.7570003527 |

|                                                                                    |                                                                                                                                                                                                                                                                                                                                                                                                                                                                                                                                                                                                                                                                                                                                                                                                                                                                                                                                                                                                                                                         |
|------------------------------------------------------------------------------------|---------------------------------------------------------------------------------------------------------------------------------------------------------------------------------------------------------------------------------------------------------------------------------------------------------------------------------------------------------------------------------------------------------------------------------------------------------------------------------------------------------------------------------------------------------------------------------------------------------------------------------------------------------------------------------------------------------------------------------------------------------------------------------------------------------------------------------------------------------------------------------------------------------------------------------------------------------------------------------------------------------------------------------------------------------|
|                                                                                    | Cu,1.8024639863,0.,1.0211923735<br>Cu,0.0168534556,0.,-2.0715757883<br>Cu,-1.4819831498,0.,0.8556233704<br>Br,4.3156784248,0.,2.5895444584<br>Br,-0.0847720727,0.,-5.0322593797                                                                                                                                                                                                                                                                                                                                                                                                                                                                                                                                                                                                                                                                                                                                                                                                                                                                         |
| 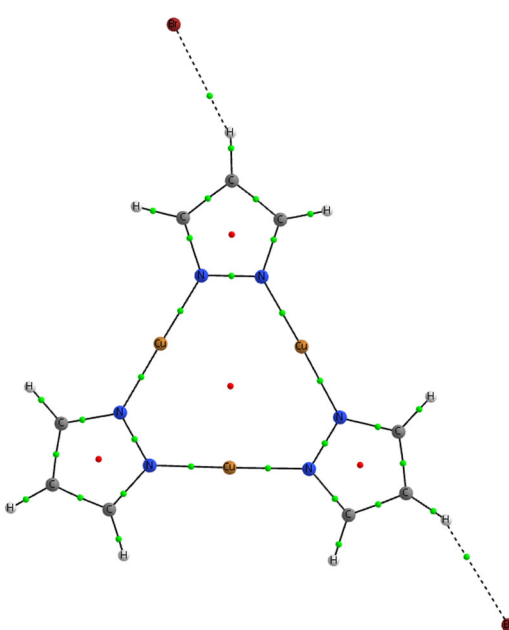 | MP2= -2096.72625880 NIMAG= 0<br>N,0.684640668,0.,2.3970091193<br>N,-0.684640668,0.,2.3970091193<br>N,2.5015972041,0.,-0.7480925616<br>N,1.8183891553,0.,-1.9393115352<br>N,-1.8183891553,0.,-1.9393115352<br>N,-2.5015972041,0.,-0.7480925616<br>C,1.1128247039,0.,3.6939915846<br>C,-1.1128247039,0.,3.6939915846<br>C,3.8430691449,0.,-1.0260485163<br>C,2.7438497634,0.,-2.9501104246<br>C,-2.7438497634,0.,-2.9501104246<br>C,-3.8430691449,0.,-1.0260485163<br>C,0.,0.,4.5529452313<br>C,4.0434354688,0.,-2.4146671922<br>C,-4.0434354688,0.,-2.4146671922<br>H,2.1792525612,0.,3.9147735387<br>H,-2.1792525612,0.,3.9147735387<br>H,4.5767367049,0.,-0.221179178<br>H,2.4081246109,0.,-3.9865194215<br>H,-2.4081246109,0.,-3.9865194215<br>H,-4.5767367049,0.,-0.221179178<br>H,0.,0.,5.6416634889<br>H,5.0133071047,0.,-2.9206231268<br>H,-5.0133071047,0.,-2.9206231268<br>Cu,1.6036652184,0.,0.8242932915<br>Cu,0.,0.,-1.9597541948<br>Cu,-1.6036652184,0.,0.8242932915<br>Br,7.7686406869,0.,-2.990942837<br>Br,-7.7686406869,0.,-2.990942837 |

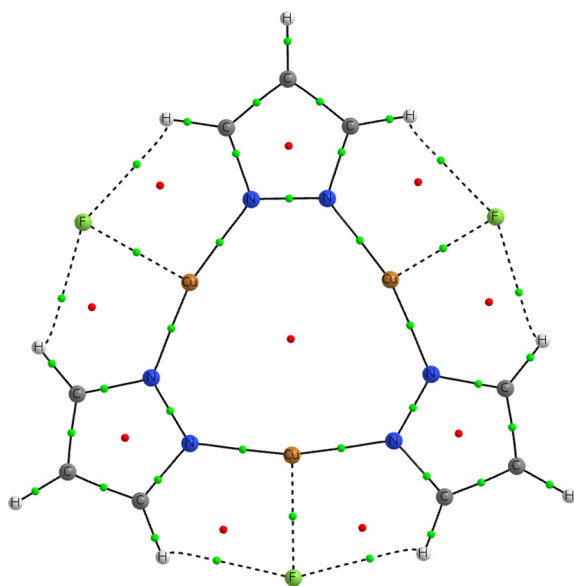

MP2= -1564.21127878 NIMAG= 0  
 N,0.6868406381,0.,2.5221144355  
 N,-0.6868220739,0.,2.5220744169  
 N,2.5276064594,0.,-0.6662517715  
 N,1.8407655217,0.,-1.855850362  
 N,-1.8407546557,0.,-1.8558404671  
 N,-2.5275795104,0.,-0.6662161327  
 C,1.11921296,0.,3.8185088708  
 C,-1.1192561722,0.,3.8184561587  
 C,3.8665084152,0.,-0.9399840166  
 C,2.7472505743,0.,-2.8785306177  
 C,-2.7472604596,0.,-2.878509292  
 C,-3.8664839711,0.,-0.9399458364  
 C,-0.0000413589,0.,4.6814803811  
 C,4.0542540979,0.,-2.3407676893  
 C,-4.0542543435,0.,-2.340727392  
 H,2.1981862998,0.,3.9860698522  
 H,-2.1982392338,0.,3.9859711076  
 H,4.5510985176,0.,-0.0893373683  
 H,2.3528331693,0.,-3.8967136965  
 H,-2.3528647563,0.,-3.8967015357  
 H,-4.551067021,0.,-0.0892948804  
 H,-0.000066779,0.,5.7745154992  
 H,5.0008418941,0.,-2.8872980468  
 H,-5.000851175,0.,-2.88724372  
 Cu,1.8103057642,0.,1.0451731775  
 Cu,0.0000136829,0.,-2.0903045361  
 Cu,-1.8102420265,0.,1.0451580954  
 F,3.7249181008,0.,2.1505530285  
 F,0.0000020429,0.,-4.3011040213  
 F,-3.7248546014,0.,2.1505495099

|                                                                                    |                               |
|------------------------------------------------------------------------------------|-------------------------------|
| 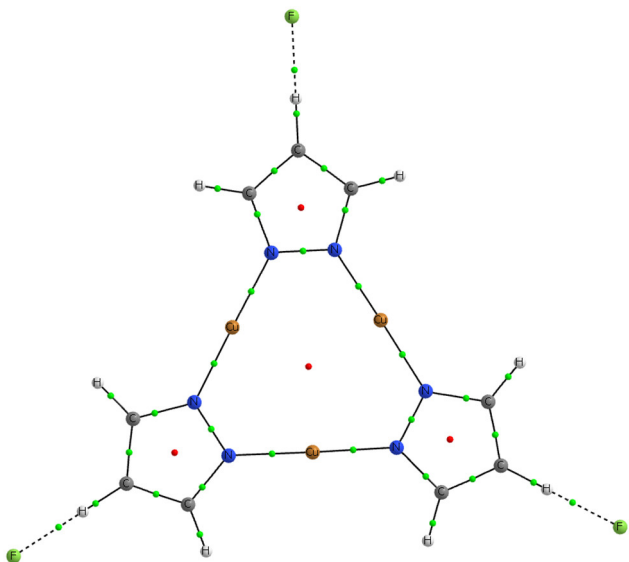 | MP2= -1564.24484018 NIMAG= 0  |
|                                                                                    | X                             |
|                                                                                    | X,1,r21                       |
|                                                                                    | X,1,r21,2,120.                |
|                                                                                    | X,1,r21,2,120.,3,180.,0       |
|                                                                                    | N,2,r52,1,90.,3,0.,0          |
|                                                                                    | N,2,r52,1,90.,4,0.,0          |
|                                                                                    | N,3,r52,1,90.,2,0.,0          |
|                                                                                    | N,3,r52,1,90.,4,0.,0          |
|                                                                                    | N,4,r52,1,90.,3,0.,0          |
|                                                                                    | N,4,r52,1,90.,2,0.,0          |
|                                                                                    | C,5,r115,2,a1152,1,180.,0     |
|                                                                                    | C,6,r115,2,a1152,1,180.,0     |
|                                                                                    | C,7,r115,3,a1152,1,180.,0     |
|                                                                                    | C,8,r115,3,a1152,1,180.,0     |
|                                                                                    | C,9,r115,4,a1152,1,180.,0     |
|                                                                                    | C,10,r115,4,a1152,1,180.,0    |
|                                                                                    | C,1,r171,3,120.,2,0.,0        |
|                                                                                    | C,1,r171,4,120.,3,0.,0        |
|                                                                                    | C,1,r171,2,120.,4,0.,0        |
|                                                                                    | H,11,r2011,5,a20115,2,180.,0  |
|                                                                                    | H,12,r2011,6,a20115,2,180.,0  |
|                                                                                    | H,13,r2011,7,a20115,3,180.,0  |
|                                                                                    | H,14,r2011,8,a20115,3,180.,0  |
|                                                                                    | H,15,r2011,9,a20115,4,180.,0  |
|                                                                                    | H,16,r2011,10,a20115,4,180.,0 |
|                                                                                    | H,1,r261,3,120.,2,0.,0        |
|                                                                                    | H,1,r261,4,120.,3,0.,0        |
|                                                                                    | H,1,r261,2,120.,4,0.,0        |
|                                                                                    | Cu,1,r291,3,60.,2,0.,0        |
|                                                                                    | Cu,1,r291,4,60.,3,0.,0        |
|                                                                                    | Cu,1,r291,2,60.,4,0.,0        |
|                                                                                    | F,1,rf,29,60.,2,180.,0        |
| F,1,rf,30,60.,3,180.,0                                                             |                               |
| F,1,rf,31,60.,4,180.,0                                                             |                               |
| r21=2.49741417                                                                     |                               |
| r52=0.68666322                                                                     |                               |
| r115=1.37336524                                                                    |                               |
| r171=4.6838587                                                                     |                               |
| r2011=1.09024204                                                                   |                               |
| r261=5.80563649                                                                    |                               |
| r291=1.85581634                                                                    |                               |
| a1152=107.60013957                                                                 |                               |

|                                                                                    |                                  |
|------------------------------------------------------------------------------------|----------------------------------|
|                                                                                    | a20115=119.23623403              |
| 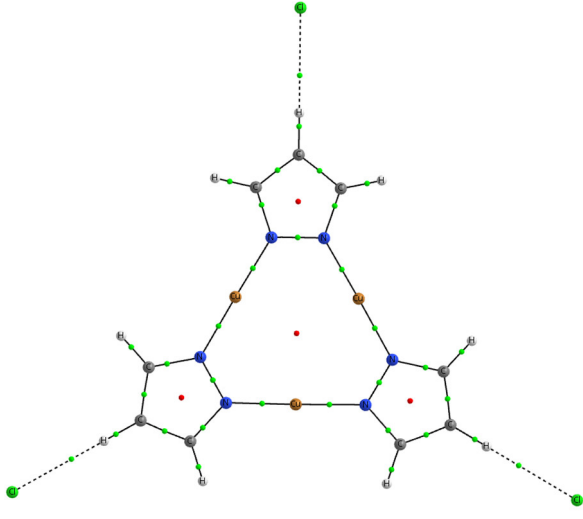 | MP2= -2644.39916814 NIMAG= 0     |
|                                                                                    | N,0.6862226141,0.,2.4967553998   |
|                                                                                    | N,-0.6862226141,0.,2.4967553998  |
|                                                                                    | N,2.505331815,0.,-0.6540730086   |
|                                                                                    | N,1.8191048601,0.,-1.8426329634  |
|                                                                                    | N,-1.8191048601,0.,-1.8426329634 |
|                                                                                    | N,-2.505331815,0.,-0.6540730086  |
|                                                                                    | C,1.1071898609,0.,3.8008056819   |
|                                                                                    | C,-1.1071898609,0.,3.8008056819  |
|                                                                                    | C,3.8451448468,0.,-0.9415667973  |
|                                                                                    | C,2.7379179971,0.,-2.859266084   |
|                                                                                    | C,-2.7379179971,0.,-2.859266084  |
|                                                                                    | C,-3.8451448468,0.,-0.9415667973 |
|                                                                                    | C,0.,0.,4.6671088777             |
|                                                                                    | C,4.0417588179,0.,-2.3335856418  |
|                                                                                    | C,-4.0417588179,0.,-2.3335856418 |
|                                                                                    | H,2.1729974458,0.,4.0259735117   |
|                                                                                    | H,-2.1729974458,0.,4.0259735117  |
|                                                                                    | H,4.5730645483,0.,-0.1311485806  |
|                                                                                    | H,2.3999912066,0.,-3.894861969   |
|                                                                                    | H,-2.3999912066,0.,-3.894861969  |
|                                                                                    | H,-4.5730645483,0.,-0.1311485806 |
|                                                                                    | H,0.,0.,5.7632050926             |
|                                                                                    | H,4.9909904468,0.,-2.8816600017  |
|                                                                                    | H,-4.9909904468,0.,-2.8816600017 |
|                                                                                    | Cu,1.6071467473,0.,0.927901612   |
|                                                                                    | Cu,0.,0.,-1.8556229381           |
|                                                                                    | Cu,-1.6071467473,0.,0.927901612  |
|                                                                                    | Cl,7.3666453966,0.,-4.253152124  |
|                                                                                    | Cl,-7.3666453966,0.,-4.253152124 |
|                                                                                    | Cl,0.,0.,8.5063318427            |



|                                                                                    |                                  |
|------------------------------------------------------------------------------------|----------------------------------|
| 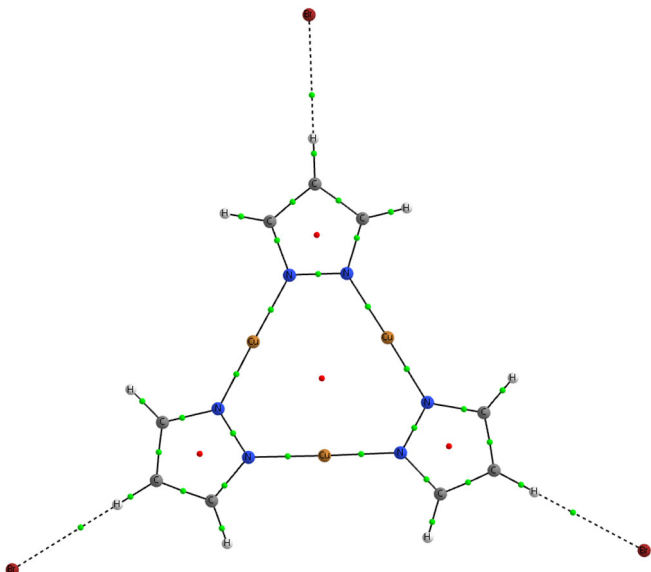 | MP2= -2512.37387779 NIMAG= 0     |
|                                                                                    | N,0.686148984,0.,2.4965483731    |
|                                                                                    | N,-0.6861489841,0.,2.4965483731  |
|                                                                                    | N,2.5051641689,0.,-0.6540553825  |
|                                                                                    | N,1.8190090963,0.,-1.842495185   |
|                                                                                    | N,-1.8190090962,0.,-1.842495185  |
|                                                                                    | N,-2.5051641689,0.,-0.6540553826 |
|                                                                                    | C,1.107867224,0.,3.7998914873    |
|                                                                                    | C,-1.1078672241,0.,3.7998914873  |
|                                                                                    | C,3.8447506165,0.,-0.9405169572  |
|                                                                                    | C,2.7368696491,0.,-2.8593924462  |
|                                                                                    | C,-2.736869649,0.,-2.8593924462  |
|                                                                                    | C,-3.8447506165,0.,-0.9405169573 |
|                                                                                    | C,-0.0000000001,0.,4.6648517161  |
|                                                                                    | C,4.0398843321,0.,-2.3324402451  |
|                                                                                    | C,-4.0398843321,0.,-2.3324402452 |
|                                                                                    | H,2.1734841324,0.,4.0255790749   |
|                                                                                    | H,-2.1734841325,0.,4.0255790748  |
|                                                                                    | H,4.5730163782,0.,-0.1305148332  |
|                                                                                    | H,2.3995043024,0.,-3.8950849854  |
|                                                                                    | H,-2.3995043024,0.,-3.8950849855 |
|                                                                                    | H,-4.5730163782,0.,-0.1305148333 |
|                                                                                    | H,-0.0000000001,0.,5.7592642285  |
|                                                                                    | H,4.9876693278,0.,-2.8796528293  |
| H,-4.9876693277,0.,-2.8796528294                                                   |                                  |

|                                   |
|-----------------------------------|
| Cu,1.6071310012,0.,0.9278723798   |
| Cu,0.,0.,-1.8557285226            |
| Cu,-1.6071310012,0.,0.9278723798  |
| Br,7.5597621472,0.,-4.3645300885  |
| Br,-7.5597621471,0.,-4.3645300886 |
| Br,-0.0000000001,0.,8.7291967801  |

**Table S4.** Electron density properties (au) at the intermolecular BCPs in the 1:1 complexes.

## 1:1 Cu complexes

| Configuration | Atoms     | Dist   | Rho    | Lap    | H       |
|---------------|-----------|--------|--------|--------|---------|
| Apical        | Cu25-F28  | 2.1354 | 0.0522 | 0.2611 | -0.0071 |
| Planar        | F28-Cu26  | 2.0158 | 0.0683 | 0.3678 | -0.0121 |
| Planar        | H19-F28   | 2.2785 | 0.0148 | 0.0541 | 0.0004  |
| CH(4)         | H22-F28   | 1.5510 | 0.0608 | 0.1809 | -0.0107 |
|               |           |        |        |        |         |
| Apical        | Cl28-Cu25 | 2.5561 | 0.0392 | 0.1336 | -0.0034 |
| Planar        | Cl28-Cu26 | 2.4297 | 0.0507 | 0.1711 | -0.0084 |
| Planar        | H19-Cl28  | 2.5748 | 0.0141 | 0.0429 | 0.0009  |
| CH(4)         | H22-Cl28  | 2.3572 | 0.0192 | 0.0495 | 0.0005  |
|               |           |        |        |        |         |
| Apical        | Br28-Cu25 | 2.6924 | 0.0362 | 0.1012 | -0.0040 |
| Planar        | Br28-Cu26 | 2.5745 | 0.0455 | 0.1243 | -0.0080 |
| Planar        | H19-Br28  | 2.6652 | 0.0140 | 0.0404 | 0.0008  |
| CH(4)         | Br28-H22  | 2.5470 | 0.0160 | 0.0379 | 0.0003  |

## 1: 1 Ag complexes

| Configuration | Atoms     | Dist  | Rho    | Lap    | H       |
|---------------|-----------|-------|--------|--------|---------|
| Apical        | F28-Ag25  | 2.379 | 0.0422 | 0.1823 | -0.0045 |
| Planar        | F28-Ag26  | 2.256 | 0.0545 | 0.2623 | -0.0048 |
| Planar        | H19-F28   | 2.483 | 0.0094 | 0.0355 | 0.0009  |
| CH(4)         | H22-F28   | 1.554 | 0.0605 | 0.1800 | -0.0105 |
|               |           |       |        |        |         |
| Apical        | Cl28-Ag25 | 2.758 | 0.0341 | 0.1118 | -0.0026 |
| Planar        | Cl28-Ag26 | 2.623 | 0.0443 | 0.1474 | -0.0051 |
| Planar        | H19-Cl28  | 2.790 | 0.0094 | 0.0272 | 0.0007  |
| CH(4)         | H22-Cl28  | 2.366 | 0.0188 | 0.0486 | 0.0005  |
|               |           |       |        |        |         |
| Apical        | Br28-Ag25 | 2.856 | 0.0337 | 0.0935 | -0.0039 |
| Planar        | Br28-Ag26 | 2.722 | 0.0434 | 0.1177 | -0.0072 |
| Planar        | H19-Br28  | 2.889 | 0.0093 | 0.0263 | 0.0008  |
| CH(4)         | H22-Br28  | 2.556 | 0.0157 | 0.0373 | 0.0003  |

## 1: 1 Au complexes

| Configuration | Atoms     | Dist  | Rho    | Lap    | H       |
|---------------|-----------|-------|--------|--------|---------|
| Apical        | Au25-F28  | 2.558 | 0.0358 | 0.1296 | -0.0036 |
| Planar        | F28-Au26  | 2.434 | 0.0454 | 0.1776 | -0.0046 |
| Planar        | H19-F28   | 2.336 | 0.0126 | 0.0433 | 0.0004  |
| CH(4)         | H22-F28   | 1.508 | 0.0676 | 0.1866 | -0.0155 |
|               |           |       |        |        |         |
| Apical        | Cl28-Au25 | 3.017 | 0.0253 | 0.0738 | -0.0005 |
| Planar        | Cl28-Au26 | 2.956 | 0.0283 | 0.0817 | -0.0008 |

|        |           |       |        |        |         |
|--------|-----------|-------|--------|--------|---------|
| Planar | H19-Cl28  | 2.614 | 0.0127 | 0.0351 | 0.0006  |
| CH(4)  | H22-Cl28  | 2.317 | 0.0208 | 0.0537 | 0.0005  |
|        |           |       |        |        |         |
| Apical | Br28-Au25 | 3.127 | 0.0246 | 0.0637 | -0.0010 |
| Planar | Br28-Au26 | 3.088 | 0.0265 | 0.0666 | -0.0014 |
| Planar | H19-Br28  | 2.706 | 0.0127 | 0.0336 | 0.0006  |
| CH(4)  | H22-Br28  | 2.507 | 0.0173 | 0.0406 | 0.0003  |

**Table S5.** Barriers (kJ mol<sup>-1</sup>) and interhalogen distance (Å) in the maximum of the dissociation curve (Figure S1) of the 1:2 apical complexes.

|    | <b>Barrier</b>       |                       |                       | <b>X...X distance</b> |                       |                       |
|----|----------------------|-----------------------|-----------------------|-----------------------|-----------------------|-----------------------|
|    | <b>F<sup>-</sup></b> | <b>Cl<sup>-</sup></b> | <b>Br<sup>-</sup></b> | <b>F<sup>-</sup></b>  | <b>Cl<sup>-</sup></b> | <b>Br<sup>-</sup></b> |
| Au | 33.0                 | 7.5                   | 8.7                   | 4.9                   | 6.2                   | 6.7                   |
| Ag | 88.6                 | 56.4                  | 59.0                  | 5.4                   | 6.3                   | 6.8                   |
| Cu | 95.6                 | 29.6                  | 23.7                  | 4.7                   | 5.7                   | 6.2                   |

**Table S6.** Interatomic X...X distances (Å) in the 1:2 complexes.

| <b>F<sup>-</sup></b>  | <b>1:2 apical</b> | <b>1:2 planar</b> | <b>1:2 CH(4)</b> |
|-----------------------|-------------------|-------------------|------------------|
| Au                    | 3.534             | 12.219*           | 13.360           |
| Ag                    | 3.165             | 8.343             | 13.602           |
| Cu                    | 2.697             | 7.370             | 13.156           |
| <b>Cl<sup>-</sup></b> |                   |                   |                  |
| Au                    | 5.206             | 9.323             | 15.182           |
| Ag                    | 4.330             | 8.886             | 15.484           |
| Cu                    | 4.087             | 8.324             | 15.023           |
| <b>Br<sup>-</sup></b> |                   |                   |                  |
| Au                    | 5.483             | 9.510             | 15.699           |
| Ag                    | 4.627             | 9.097             | 16.019           |
| Cu                    | 4.562             | 8.801             | 15.537           |

\* In this complex, the F(-) anions are interacting with the C(3)-H.

**Table S7.** Anion-Anion repulsion corrected binding energies (kJ/mol) for the 1:2 complexes.

| <b>F<sup>-</sup></b>  | <b>1:2 apical</b> | <b>1:2 planar</b> | <b>1:2 CH(4)</b> |
|-----------------------|-------------------|-------------------|------------------|
| Au                    | -280.1            | -149.4            | -143.6           |
| Ag                    | -485.4            | -245.5            | -120.7           |
| Cu                    | -549.9            | -270.8            | -125.9           |
| <b>Cl<sup>-</sup></b> |                   |                   |                  |
| Au                    | -127.4            | -125.1            | -75.7            |
| Ag                    | -297.6            | -182.2            | -60.5            |
| Cu                    | -246.5            | -164.8            | -64.4            |
| <b>Br<sup>-</sup></b> |                   |                   |                  |
| Au                    | -133.0            | -125.9            | -69.7            |
| Ag                    | -285.0            | -176.7            | -55.5            |
| Cu                    | -210.5            | -147.3            | -59.1            |

**Table S8.** Electron density properties (au) at the intermolecular BCPs in the 1:2 complexes.

## 1:2 Cu complexes

| Configuration | Atoms     | Dist   | Rho    | Lap    | H       |
|---------------|-----------|--------|--------|--------|---------|
| Apical        | F28-F29   | 2.6975 | 0.0197 | 0.0744 | -0.0010 |
| Apical        | Cu25-F28  | 2.2109 | 0.0442 | 0.2059 | -0.0055 |
| Planar        | F28-Cu25  | 2.0895 | 0.0577 | 0.2947 | -0.0087 |
| Planar        | F28-H18   | 2.4934 | 0.0095 | 0.0383 | 0.0011  |
| Planar        | H16-F28   | 2.2599 | 0.0153 | 0.0538 | 0.0002  |
| CH(4)         | F28-H23   | 1.6591 | 0.0471 | 0.1519 | -0.0043 |
|               |           |        |        |        |         |
| Apical        | Cl28-Cu25 | 2.7073 | 0.0293 | 0.0928 | -0.0012 |
| Planar        | Cl28-Cu25 | 2.6392 | 0.0333 | 0.1072 | -0.0020 |
| Planar        | Cl28-H18  | 2.6170 | 0.0127 | 0.0376 | 0.0008  |
| Planar        | H16-Cl28  | 2.5495 | 0.0146 | 0.0430 | 0.0008  |
| CH(4)         | Cl28-H23  | 2.5325 | 0.0138 | 0.0352 | 0.0004  |
|               |           |        |        |        |         |
| Apical        | Br28-Cu25 | 2.8924 | 0.0252 | 0.0650 | -0.0014 |
| Planar        | Cu25-Br28 | 2.9624 | 0.0222 | 0.0539 | -0.0011 |
| Planar        | H18-Br28  | 2.7206 | 0.0123 | 0.0340 | 0.0007  |
| Planar        | H16-Br28  | 2.6397 | 0.0144 | 0.0392 | 0.0006  |
| CH(4)         | Br28-H23  | 2.7562 | 0.0110 | 0.0275 | 0.0005  |

## 1:2 Ag complexes

| Configuration | Atoms     | Dist  | Rho    | Lap    | H       |
|---------------|-----------|-------|--------|--------|---------|
| Apical        | Ag26-F28  | 2.437 | 0.0372 | 0.1526 | -0.0042 |
| Planar        | F28-Ag25  | 2.327 | 0.0467 | 0.2100 | -0.0046 |
| Planar        | H16-F28   | 2.179 | 0.0173 | 0.0555 | -0.0004 |
| CH(4)         | F28-H23   | 1.660 | 0.0470 | 0.1514 | -0.0043 |
|               |           |       |        |        |         |
| Apical        | Cl28-Ag25 | 2.845 | 0.0287 | 0.0923 | -0.0015 |
| Planar        | Cl28-Ag25 | 2.734 | 0.0354 | 0.1156 | -0.0028 |
| Planar        | H16-Cl28  | 2.720 | 0.0106 | 0.0301 | 0.0006  |
| Planar        | Cl28-H18  | 2.971 | 0.0068 | 0.0200 | 0.0007  |
| CH(4)         | Cl28-H23  | 2.538 | 0.0137 | 0.0348 | 0.0004  |
|               |           |       |        |        |         |
| Apical        | Br28-Ag25 | 2.949 | 0.0282 | 0.0785 | -0.0023 |
| Planar        | Br28-Ag25 | 2.849 | 0.0340 | 0.0932 | -0.0039 |
| Planar        | Br28-H18  | 3.001 | 0.0075 | 0.0216 | 0.0008  |
| Planar        | H16-Br28  | 2.827 | 0.0103 | 0.0286 | 0.0007  |
| CH(4)         | Br28-H23  | 2.775 | 0.0107 | 0.0269 | 0.0005  |

## 1:2 Au complexes

| Configuration | Atoms    | Dist  | Rho    | Lap    | H       |
|---------------|----------|-------|--------|--------|---------|
| Apical        | Au25-F28 | 2.613 | 0.0320 | 0.1118 | -0.0032 |

|        |           |       |        |        |         |
|--------|-----------|-------|--------|--------|---------|
| Planar | F28-H16   | 1.592 | 0.0552 | 0.1725 | -0.0074 |
| CH(4)  | F28-H23   | 1.619 | 0.0517 | 0.1635 | -0.0061 |
|        |           |       |        |        |         |
| Apical | Cl28-Au25 | 3.226 | 0.0174 | 0.0482 | 0.0002  |
| Planar | Au26-Cl29 | 3.325 | 0.0148 | 0.0391 | 0.0003  |
| Planar | H16-Cl28  | 2.591 | 0.0130 | 0.0340 | 0.0005  |
| Planar | Cl28-H18  | 2.977 | 0.0065 | 0.0179 | 0.0005  |
| CH(4)  | Cl28-H23  | 2.478 | 0.0153 | 0.0391 | 0.0005  |
|        |           |       |        |        |         |
| Apical | Br28-Au25 | 3.339 | 0.0169 | 0.0436 | 0.0001  |
| Planar | Br29-Au26 | 3.455 | 0.0140 | 0.0349 | 0.0003  |
| Planar | H16-Br28  | 2.727 | 0.0120 | 0.0304 | 0.0005  |
| Planar | H18-Br28  | 2.996 | 0.0074 | 0.0198 | 0.0006  |
| CH(4)  | Br28-H23  | 2.696 | 0.0123 | 0.0304 | 0.0005  |



**Table S9.** Interatomic distances (Å) of the anions in the 1:3 complexes.

| <b>F(-)</b>  | <b>Planar</b> | <b>CH(4)</b> |
|--------------|---------------|--------------|
| Au           |               | 13.361       |
| Ag           | 8.158         | 13.573       |
| Cu           | 7.450         | 13.141       |
| <b>Cl(-)</b> | planar        | <b>CH(4)</b> |
| Au           |               | 14.866       |
| Ag           | 9.038         | 15.169       |
| Cu           |               | 14.733       |
| <b>Br(-)</b> | planar        | <b>CH(4)</b> |
| Au           |               | 15.226       |
| Ag           | 9.353         | 15.559       |
| Cu           |               | 15.120       |

**Table S10.** Anion-Anion repulsion corrected binding energies (kJ/mol) in the 1:3 complexes.

| <b>F(-)</b>  | <b>Planar</b> | <b>CH(4)</b> |
|--------------|---------------|--------------|
| Au           |               | -175.8       |
| Ag           | -286.3        | -146.8       |
| Cu           | -307.4        | -153.3       |
| <b>Cl(-)</b> | planar        | CH(4)        |
| Au           |               | -92.3        |
| Ag           | -201.0        | -71.7        |
| Cu           |               | -76.6        |
| <b>Br(-)</b> | planar        | CH(4)        |
| Au           |               | -85.6        |
| Ag           | -193.4        | -66.0        |
| Cu           |               | -70.7        |

**Table S11.** Electron density properties at the intermolecular BCPs in the 1:3 complexes.

## 1:3 Cu complexes

| Configuration | Atoms    | Dist   | Rho    | Lap    | H       |
|---------------|----------|--------|--------|--------|---------|
| Planar        | F28-Cu25 | 2.2108 | 0.0443 | 0.2049 | -0.0053 |
| Planar        | F28-H16  | 2.3875 | 0.0116 | 0.0425 | 0.0007  |
| CH(4)         | F30-H22  | 1.7813 | 0.0357 | 0.1149 | -0.0018 |
|               |          |        |        |        |         |
| CH(4)         | H22-Cl30 | 2.7431 | 0.0093 | 0.0231 | 0.0003  |
|               |          |        |        |        |         |
| CH(4)         | Br30-H22 | 2.9699 | 0.0074 | 0.0182 | 0.0005  |

## 1:3 Ag complexes

| Configuration | Atoms     | Dist  | Rho    | Lap    | H       |
|---------------|-----------|-------|--------|--------|---------|
| Planar        | Ag27-F30  | 2.411 | 0.0392 | 0.1624 | -0.0042 |
| Planar        | F28-H16   | 2.461 | 0.0098 | 0.0350 | 0.0007  |
| CH(4)         | F30-H22   | 1.777 | 0.0360 | 0.1160 | -0.0019 |
|               |           |       |        |        |         |
| Planar        | Cl30-Ag27 | 3.025 | 0.0204 | 0.0615 | -0.0002 |
| Planar        | H16-Cl28  | 2.863 | 0.0081 | 0.0225 | 0.0006  |
| CH(4)         | Cl28-H23  | 2.740 | 0.0094 | 0.0232 | 0.0003  |
|               |           |       |        |        |         |
| Planar        | Br30-Ag27 | 3.238 | 0.0166 | 0.0448 | 0.0001  |
| Planar        | H16-Br28  | 2.942 | 0.0082 | 0.0223 | 0.0007  |
| CH(4)         | H24-Br29  | 2.969 | 0.0074 | 0.0182 | 0.0005  |

## 1:3 Au complexes

| Configuration | Atoms    | Dist  | Rho    | Lap    | H       |
|---------------|----------|-------|--------|--------|---------|
| CH(4)         | F30-H22  | 1.735 | 0.0395 | 0.1280 | -0.0025 |
|               |          |       |        |        |         |
| CH(4)         | H22-Cl30 | 2.651 | 0.0110 | 0.0273 | 0.0003  |
|               |          |       |        |        |         |
| CH(4)         | H22-Br30 | 2.864 | 0.0089 | 0.0217 | 0.0005  |

**Table S12.** Anion-Metal distances in the CSD search.**Cu-F**

| Refcode | Distances (Å) |         |         |
|---------|---------------|---------|---------|
| HUXWUU  | 2.383         | 2.579   | 2.482   |
| HUXWUU  | 2.605         | 2.536   | 2.448   |
|         |               |         |         |
|         | Average       | Maximum | Minimum |
|         | 2.506         | 2.605   | 2.383   |

**Cu-Cl**

| Refcode | Distances (Å) |         |         |
|---------|---------------|---------|---------|
| JALKIT  | 2.622         | 2.424   | 2.486   |
| OBOQAY  | 2.359         | 2.545   | 2.923   |
| OBOQEC  | 2.361         | 2.549   | 2.931   |
| OBOQIG  | 2.354         | 2.560   | 2.977   |
| RETQIR  | 2.500         | 2.584   | 2.558   |
| RETQIR  | 2.628         | 2.501   | 2.614   |
| RUYGUN  | 2.461         | 2.453   | 3.056   |
| RUYGUN  | 2.641         | 2.965   | 2.350   |
| RUYGUN  | 2.486         | 2.398   | 3.039   |
| RUYGUN  | 2.756         | 2.756   | 2.341   |
| RUYHAU  | 2.600         | 2.986   | 2.357   |
| UWOMAW  | 2.626         | 2.502   | 2.630   |
| UWOMAW  | 2.648         | 2.761   | 2.581   |
| VADYAB  | 2.623         | 2.603   | 2.603   |
| VAZCUX  | 2.527         | 2.631   | 2.666   |
| VAZCUX  | 2.604         | 2.527   | 2.564   |
|         |               |         |         |
|         | Average       | Maximum | Minimum |
|         | 2.609         | 3.056   | 2.341   |

**Cu-Br**

| Refcode | Distances (Å) |         |         |
|---------|---------------|---------|---------|
| ELODIS  | 2.722         | 3.063   | 2.504   |
| ELODOY  | 2.652         | 2.750   | 2.645   |
| ELODOY  | 2.698         | 2.638   | 2.806   |
|         |               |         |         |
|         | Average       | Maximum | Minimum |
|         | 2.720         | 3.063   | 2.504   |

**Figure S1.** Energy profiles (kJ/mol) as a function of the X-X distance (Å) in the 1:2 apical complexes. Only one of the X anions in move further away from the (Pz-M)<sub>3</sub>X<sup>-</sup> system.

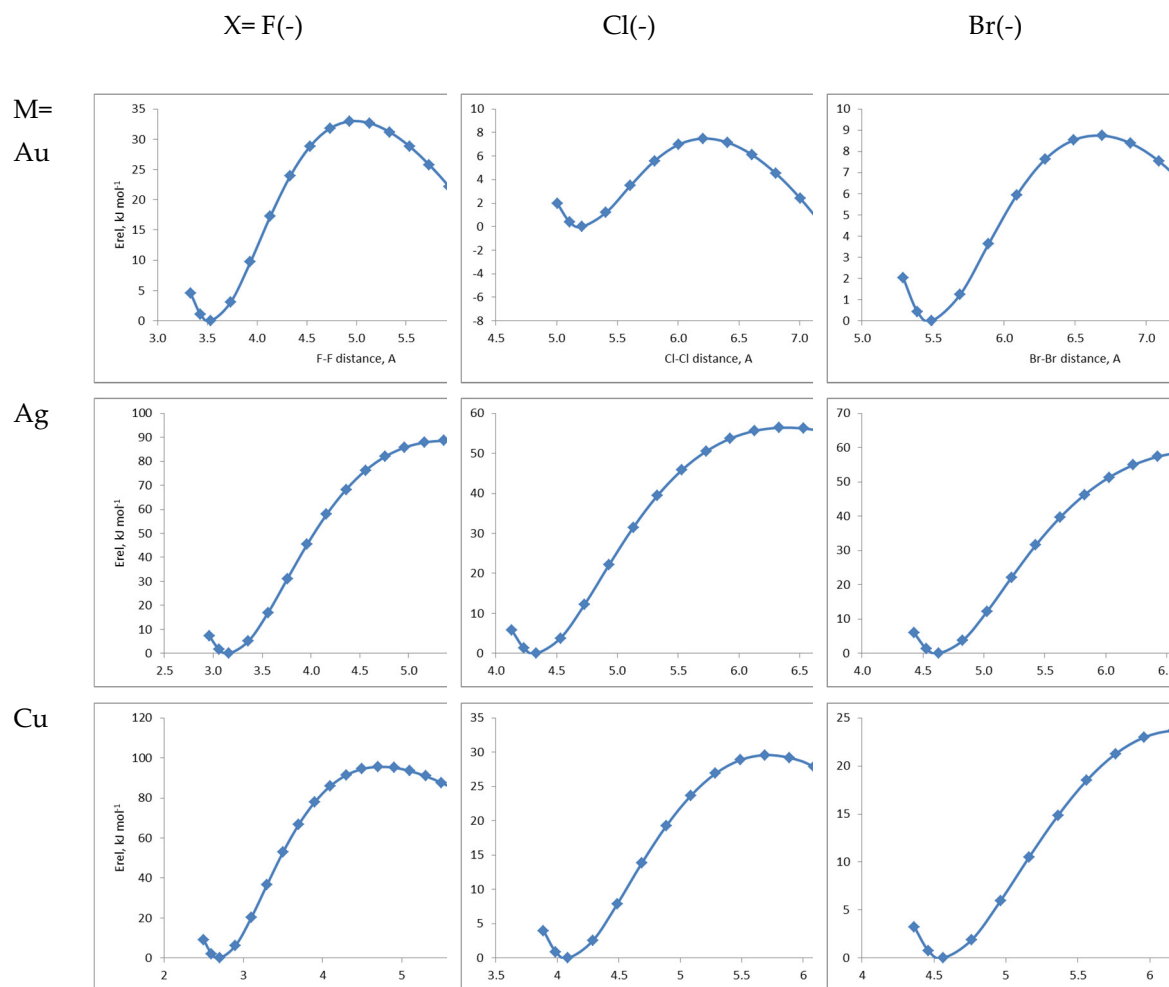

**Figure S2.** Electron density at the BCP (au) vs. the interatomic distance (Å).

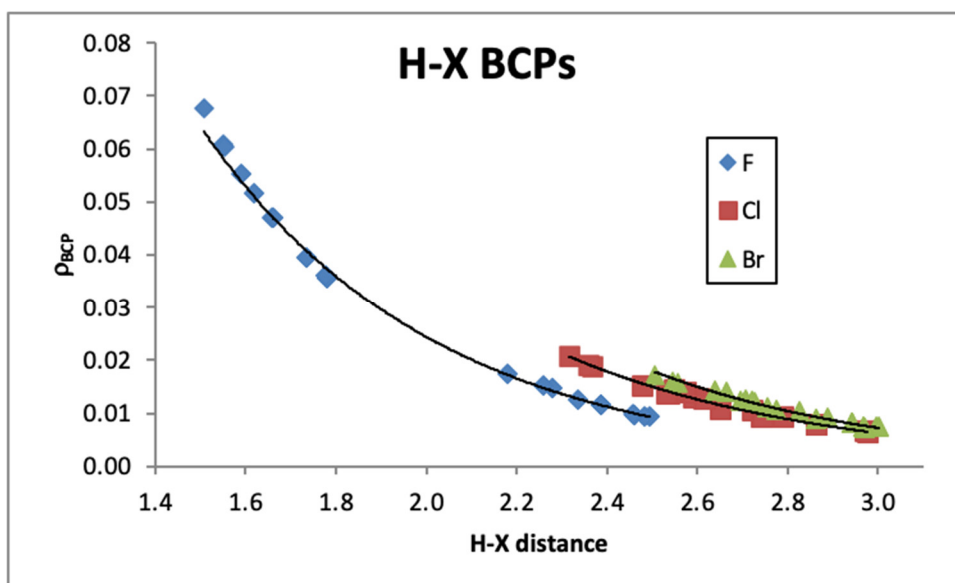

The exponential relationships show  $R^2$  values of 0.998 (H-F), 0.98 (H-Cl) and 0.98 (H-Br).

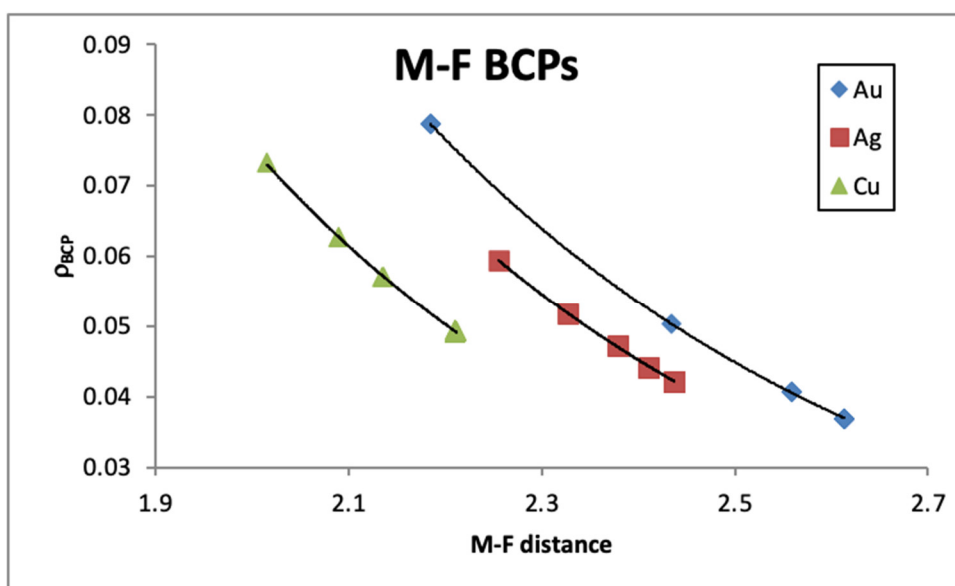

The exponential relationships show  $R^2$  values  $> 0.999$ .

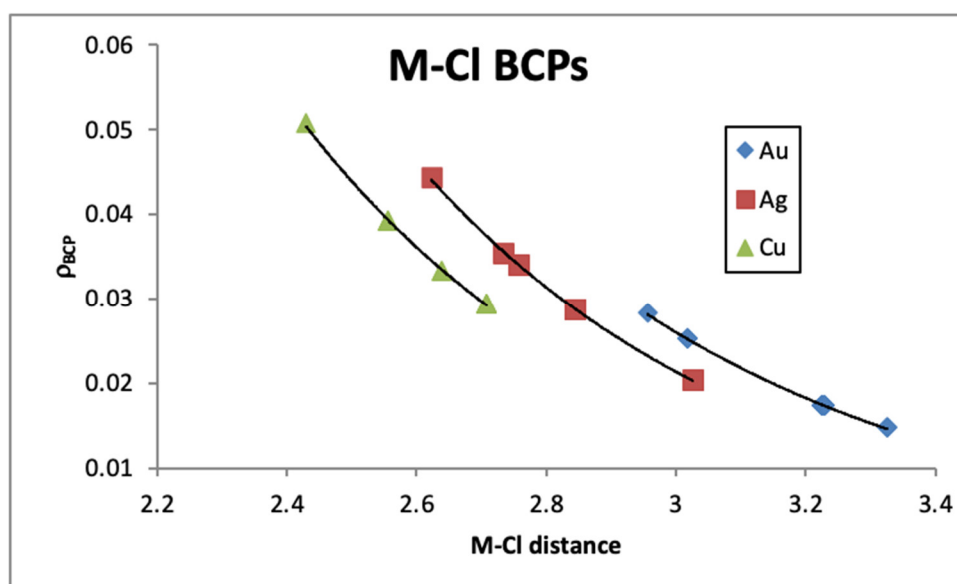

The exponential relationships show  $R^2$  values  $> 0.999$ .

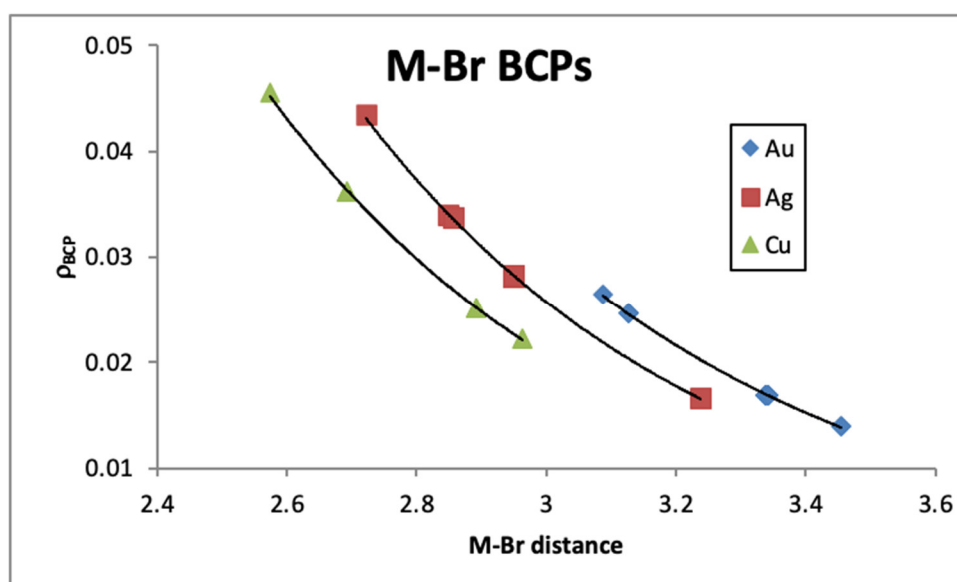

The exponential relationships show  $R^2$  values  $> 0.99$ .
